# Supplementary material for: Gravel threshold of motion: A state function of sediment transport disequilibrium?
Source: Copernicus journal article supplement (doi:10.5194/esurf-2015-52), 2016-01-19
Supplement: Supplementary file [file esurf-2015-52-AC5-supplement.pdf]

# 1 Gravel threshold of motion: A state function of sediment 2 transport disequilibrium?

3  
4 **Joel P. L. Johnson**

5 Department of Geological Sciences, The University of Texas at Austin

6 Correspondence to: [joelj@jsg.utexas.edu](mailto:joelj@jsg.utexas.edu)

## 8 **Abstract**

9 In most sediment transport models, a threshold variable dictates the shear stress at which non-  
10 negligible bedload transport begins. Previous work has demonstrated that nondimensional  
11 transport thresholds ( $\tau_c^*$ ) vary with many factors related not only to grain size and shape, but  
12 also with characteristics of the local bed surface and sediment transport rate ( $q_s$ ). I propose a  
13 new model in which  $q_s$ -dependent  $\tau_c^*$ , notated as  $\tau_{c(q_s)}^*$ , evolves as a power-law function of  
14 net erosion or deposition. In the model, net entrainment is assumed to progressively remove  
15 more mobile particles while leaving behind more stable grains, gradually increasing  $\tau_{c(q_s)}^*$  and  
16 reducing transport rates. Net deposition tends to fill in topographic lows, progressively  
17 leading to less stable distributions of surface grains, decreasing  $\tau_{c(q_s)}^*$  and increasing transport  
18 rates. Model parameters are calibrated based on laboratory flume experiments that explore  
19 transport disequilibrium. The  $\tau_{c(q_s)}^*$  equation is then incorporated into a simple  
20 morphodynamic model. The evolution of  $\tau_{c(q_s)}^*$  is a negative feedback on morphologic  
21 change, while also allowing reaches to equilibrate to sediment supply at different slopes.  
22 Finally,  $\tau_{c(q_s)}^*$  is interpreted to be an important but nonunique state variable for  
23 morphodynamics, in a manner consistent with state variables such as temperature in  
24 thermodynamics.

Deleted:

Formatted: Font: Italic

Deleted: characteristics of the flow and surrounding grains.

Formatted: Font: Italic, Subscript

Deleted: Both a conceptual model and flume experiments suggest that  $\tau_c^*$  should evolve as a function of local entrainment and deposition.

Deleted: preferentially

Deleted: s

Deleted:  $\tau_c^*$

Deleted:  $\tau_c^*$

Deleted: A new model is proposed for the temporal evolution of  $\tau_c^*$  as a power-law function of net erosion or deposition, which shares some similarities with the Exner equation.

Deleted:  $\tau_c^*$

Deleted: -evolution

Deleted:  $\tau_c^*$

Deleted: acts as

Deleted: s

Deleted:  $\tau_c^*$

Deleted: channel morphology

Deleted: the role that

Deleted: play

Deleted: describing the evolution of

Deleted: system

Deleted:

51 **1 Motivation**

52 Despite over a century of quantitative study (Gilbert, 1914), it often remains  
53 challenging to predict gravel transport rates to much better than an order of magnitude  
54 because of the complexity of grain interactions with the flow and the surrounding grains (e.g.,  
55 Schneider et al., 2015; Nitsche et al., 2011; Rickenmann, 2001; Wilcock and Crowe, 2003;  
56 Chen and Stone, 2008). Predictive models for complex systems often derive utility from their  
57 simplicity, as is the case with the widely-used Meyer-Peter and Müller (1948) transport  
58 equation, as modified by Wong and Parker (2006):

Deleted: coarse bedload

59 
$$q_s^* = 3.97(\tau^* - \tau_c^*)^{1.5} \quad \text{for} \quad \tau^* \geq \tau_c^* \quad (1)$$

60 where  $q_s^*$  is a nondimensional sediment transport rate per unit width,  $\tau^*$  is a nondimensional  
61 shear stress imparted by the fluid on the channel bed (a Shields stress), and  $\tau_c^*$  is the  
62 nondimensional threshold stress at which grains begin to move (a critical Shields stress).  
63 Variables are nondimensionalized as follows:

Deleted:

64 
$$q_s^* = \frac{q_s}{D \sqrt{\left(\frac{\rho_s}{\rho} - 1\right) g D}} \quad (2)$$

Deleted: ed

65 
$$\tau^* = \frac{\tau}{(\rho_s - \rho) g D} \quad (3)$$

66 where  $q_s$  is volume sediment transport rate per unit width ( $\text{m}^2/\text{s}$ ),  $D$  is grain diameter (m),  
67  $\rho_s$  is sediment density ( $\text{m}^3/\text{kg}$ ),  $\rho$  is water density ( $\text{m}^3/\text{kg}$ ),  $g$  is gravitational acceleration  
68 ( $\text{m}/\text{s}^2$ ), and  $\tau$  is shear stress (Pa). In principle, these nondimensionalizations should account  
69 for differences in grain size, fluid and sediment density and gravity, allowing meaningful  
70 comparisons of transport and stress across different conditions. For a given grain diameter  
71 (and constant  $\rho_s$ ,  $\rho$  and  $g$  assumed for terrestrial landscapes), the simplicity of Eq. (1) is  
72 that it predicts transport rate using just two variables,  $\tau^*$  (a function of flow strength) and  $\tau_c^*$   
73 (a function of many variables). In practice,  $\tau_c^*$  is often back-calculated from shear stress and  
74 bedload transport rate, essentially making it an empirical fitting parameter for a given  
75 transport model (e.g., Wong and Parker, 2006; Buffington and Montgomery, 1997). For  
76 example, using the original dataset of Meyer-Peter and Muller (1948),  $\tau^*$  and  $q_s^*$  give best-fit

Deleted:

Deleted:

Deleted: ~

Deleted:

Deleted: a particular sediment transport model.

Deleted:

Deleted: the

87  $\tau_c^*=0.0495$  for Eq. (1) (Wong and Parker, 2006). Other bedload transport models have been  
88 developed that do not use an absolute threshold stress below which transport is zero, but  
89 rather a “reference” stress that corresponds to a very low but non-zero transport rate (e.g.  
90 Parker, 1990; Wilcock and Crowe, 2003). For most applications the practical difference  
91 between threshold and reference stresses are negligible (Buffington and Montgomery, 1997).  
92 In the present work, threshold and reference stresses are used interchangeably.

**Deleted:** In practice,  $\tau_c^*$  can essentially be an empirical fitting parameter for a given transport model (e.g., Wong and Parker, 2006; Buffington and Montgomery, 1997).

**Deleted:**

93 Thresholds of motion for gravel often span an order of magnitude or more (Fig. 1).  
94 Variability in  $\tau_c^*$  greatly influences bedload flux predictions in mountain rivers because  
95 transport typically occurs close to thresholds conditions, even during large floods (Phillips et  
96 al., 2013; Parker et al., 1982; Parker and Klingeman, 1982). Previous work has demonstrated  
97 that a great many factors collectively cause  $\tau_c^*$  scatter (e.g., Buffington and Montgomery,  
98 1997; Kirchner et al., 1990). Slope can empirically explain 34% of the variability shown in  
99 Fig. 1 data. However, other variables including the strength of turbulent velocity fluctuations,  
100 and flow depth relative to bed roughness, also vary with reach slope and have been interpreted  
101 to influence  $\tau_c^*$  mechanistically (Lamb et al., 2008). In addition, thresholds can change  
102 temporally: using field data. Turowski et al. (2011) demonstrated that threshold discharges for  
103 the start and end of bedload transport could change by an order of magnitude during a given  
104 flood event.

**Deleted:** ; see caption for data sources

**Deleted:** s

**Deleted:** that can

**Deleted:** ; for example, s

**Deleted:** (e.g., Buffington and Montgomery, 1997; Kirchner et al., 1990; Lamb et al., 2008).

105 Although thresholds of motion may dynamically evolve over time, we suggest several  
106 reasons why an assumption of constant  $\tau_c^*$  remains ingrained in some studies. First, the  
107 traditional Shields diagram indicates that  $\tau_c^*$  is rather insensitive to particle Reynolds number  
108 once flow becomes hydraulically rough around grains (Buffington, 1999). Second, because  
109 the best estimate of a given variable is usually its average, there is a tendency to attribute  
110 variability to measurement noise and uncertainty, even when that variability may be real,  
111 understandable, and important to system dynamics (Jerolmack, 2011; Buffington and  
112 Montgomery, 1997; Chen and Stone, 2008). Third, a broadly applicable model for the  
113 temporal evolution of  $\tau_c^*$  has arguably not been developed, although progress has been made  
114 (Recking, 2012; Bunte et al., 2013; Wilcock and Crowe, 2003). Next in this section, I  
115 summarize previous work on  $\tau_c^*$  controls, suggest ways that evolving  $\tau_c^*$  may influence

126 gravel-bed river morphodynamics, and then propose specific hypotheses to be explored with a  
127 new model for  $\tau_c^*$  evolution.

### 128 1.1 Previous work: mechanistic controls on $\tau_c^*$

129 In order to review previous work in an organized manner, factors affecting  $\tau_c^*$  are  
130 categorized as (a) grain controls, (b) bed state controls, (c) discharge controls, and (d)  
131 sediment flux controls, while acknowledging that many specific factors are interrelated and  
132 can be classified in more than one category. The literature on thresholds of motion is vast; I  
133 highlight select papers while acknowledging that many contributions are not explicitly  
134 reviewed.

135 Grain controls are physical characteristics of individual clasts that influence  $\tau_c^*$ . In  
136 addition to diameter and density, these include shape and angularity (e.g., Prancevic and  
137 Lamb, 2015; Gogus and Defne, 2005). By controlling surface grain size, armoring acts as a  
138 grain control (e.g., Dietrich et al., 1989; Parker and Toro-Escobar, 2002). However, the grain  
139 size distribution (GSD) of the surrounding bed has also been shown to strongly influence  $\tau_c^*$ ;  
140 armoring can therefore also be a bed state control. In many mixed grain size transport models,  
141 hiding/exposure functions quantify the observation that grains smaller than the average bed  
142 surface tend to be relatively less mobile than expected based on diameter alone, while grains  
143 larger than average tend to be relatively more mobile than expected based on their diameter  
144 (e.g., Parker, 1990; Wilcock and Crowe, 2003). Spatial heterogeneity in surface GSDs,  
145 whether randomly distributed or sorted into patches, can also influence local  $\tau_c^*$  (Chen and  
146 Stone, 2008; Nelson et al., 2009). Mechanistically, contrasts in diameter between a grain and  
147 the surrounding bed affects pocket geometry. On rougher beds, grains tend to protrude less  
148 into the flow and therefore tend to be more stable (higher  $\tau_c^*$ ).

149 Sand content is a related GSD bed state control: increasing sand content of alluvial  
150 bed surfaces has been shown to decrease gravel thresholds of motion (e.g., Curran and  
151 Wilcock, 2005; Iseya and Ikeda, 1987; Jackson and Beschta, 1984). Wilcock and Crowe  
152 (2003) explicitly incorporated this sand dependence into their transport model:

$$153 \tau_{rm}^* = c_1 + c_2 e^{-c_3 F_s} \quad (4)$$

Formatted: Font: Not Bold

Formatted: Heading 2, Indent: First line: 0"

Deleted: Although interrelated,  $\tau_c^*$  influences can generally be classified as grain controls, "bed state" controls, and flow controls.

Deleted: grain controls

Deleted: (Chen and Stone, 2008; Nelson et al., 2009)

160 where  $\tau_{rm}^*$  is a reference stress (rather than an absolute threshold) for the geometric mean  
161 diameter of the bed surface GSD,  $F_s$  is the spatial fraction of sand on the bed surface, and  
162 constants  $c_1$ ,  $c_2$  and  $c_3$  were empirically calibrated from flume data to be 0.021, 0.015 and 20  
163 respectively. These values result in  $\tau_{rm}^*$  varying between 0.021 and 0.036, which is in the  
164 range of typical  $\tau_c^*$  (Figure 1). Subsequent work has shown that the effects described by Eq. 4  
165 are not unique to sand sizes only. Thresholds of motion for intermediate surface diameters  
166 (e.g.  $D_{50}$ ) can similarly be reduced by grains substantially smaller than the bed surface but  
167 larger than 2mm (Venditti et al., 2010; Sklar et al., 2009; Johnson et al., 2015).  
168 Mechanistically, the addition of sand or finer gravels smooths the bed surface by  
169 preferentially filling local topographic lows, which can affect pocket geometries (making it  
170 easier for larger grains to rotate out of a stable position), and also reduce local hydraulic  
171 roughness, increasing near-bed velocity and increasing drag on protruding grains.

172 Many studies have explored the bed state control of stabilizing structures formed by  
173 coarse grain clusters (e.g., Church et al., 1998; Strom and Papanicolaou, 2009). Other bed  
174 state controls include the degree of overlap, interlocking and imbrication among grains, and  
175 bed compaction or dilation (e.g., Parker, 1990; Wilcock and Crowe, 2003; Sanguinito and  
176 Johnson, 2012; Buscombe and Conley, 2012; Mao, 2012; Kirchner et al., 1990; Strom and  
177 Papanicolaou, 2009; Marquis and Roy, 2012; Powell and Ashworth, 1995; Richards and  
178 Clifford, 1991; Ockelford and Haynes, 2013). By combining experimental data and a  
179 numerical model, Measures and Tait (2008) show that increasing grain-scale bed roughness  
180 tends to shelter downstream grains, reducing entrainment. Mechanistically, these factors attest  
181 to how, even if grain size does not change, grains can move from less stable to more stable  
182 configurations. Coarse grain clusters can also enhance bed stability by increasing surface  
183 roughness, tending to deepen potential grain pockets.

184 Flow characteristics influencing  $\tau_c^*$  include particle Reynolds number, flow depth  
185 relative to grain size, the intensity of turbulence, the history of prior flow both above and  
186 below transport thresholds, and the partitioning of stress into form drag and skin friction (e.g.,  
187 Shvidchenko and Pender, 2000; Ockelford and Haynes, 2013; Schneider et al., 2015;  
188 Valyrakis et al., 2010; Celik et al., 2010). Most flow-dependent controls are not independent  
189 of the bed surface controls. For example, flow depths, turbulence and form drag depend on  
190 slope and bed roughness, while the stress history influences  $\tau_c^*$  by changing grain interlocking

Formatted: Font: Italic

Formatted: Font: Italic, Subscript

Deleted: Bed surface controls include the grain size distribution (GSD) of the surrounding bed,

Deleted: and

Deleted: , the protrusion of grains into the flow, the degree of coarse grain clustering, the bed roughness, and the reach slope

Deleted:

Deleted:

Deleted: However, m

200 and surface roughness. Mao (2012) showed that thresholds of motion and bed roughness both  
201 evolved during hydrograph rising and falling limbs, leading to bedload hysteresis.

202 Recent work also suggests that sediment transport can affect  $\tau_c^*$ , with higher rates of  
203 upstream supply corresponding to more mobile sediment and lower  $\tau_c^*$  (Recking, 2012; Bunte  
204 et al., 2013). The idea that transport rate influences  $\tau_c^*$  is an intriguing feedback and the focus  
205 of the present analysis because, by definition,  $\tau_c^*$  influences transport rate (Eq. 1).  
206 Mechanistically, mobile grains impacting stationary grains have been shown to dislodge and  
207 entrain grains into the flow (Ancey et al., 2008). Empirically, Bunte et al. (2013) interpreted  
208 that lower  $\tau_c^*$  corresponded to looser beds caused by higher rates of sediment supply from  
209 upstream, and noted that the stability of bed particles can be qualitatively assessed in the field  
210 while doing pebble counts. Yager et al. (2012b) demonstrated that in-channel sediment  
211 availability varied inversely with the degree of boulder protrusion, indicating preferential  
212 filling of topographic lows by mobile sediment.

213 Recking (2012) compared bed load monitoring records from steep natural channels  
214 (>5% slope) to differences in sediment supply interpreted from aerial photographs of  
215 surrounding hillslopes. Channels with higher supply rates had higher transport rates for a  
216 given shear stress, consistent with a dependence of transport thresholds on supply. While  
217 stating that deriving a threshold model “taking into account the sediment input as a parameter  
218 would be difficult”, Recking (2012) proposed quantitative bounds on reference stress for the  
219 end-member cases of very high sediment supply ( $\tau_{mss}^*$ ) and very low sediment supply ( $\tau_m^*$ ) in  
220 steep mountain channels:

$$221 \tau_{mss}^* = (5S + 0.06) \left( \frac{D_{84}}{D_{50}} \right)^{-1.5} \quad (5)$$

$$222 \tau_m^* = (5S + 0.06) \left( \frac{D_{84}}{D_{50}} \right)^{4.4\sqrt{S}-1.5} \quad (6)$$

223 It should be noted that these reference stress equations describe transport of the  $D_{84}$  grain size  
224 (rather than say  $D_{50}$ ), using a  $D_{84}$ -based bedload transport model (Recking, 2012).  
225 Importantly, the ratio  $D_{84}/D_{50}$  is included in Eq. 5 and 6 to represent surface armoring, which  
226 tends to vary with sediment supply (Dietrich et al., 1989), thus relating bed state controls to

**Formatted:** Indent: First line: 0.49"

**Deleted:** In addition, recent work suggests that the amount of sediment supplied from upstream

**Deleted:** s

**Deleted:** Sensitivity of  $\tau_c^*$  to sediment flux is not obviously classifiable as either a flow or a bed state control.

**Deleted:**

**Deleted:**

**Deleted:** This feedback is the focus of the present analysis.

**Formatted:** Indent: First line: 0"

235 supply-dependent bounds. Overall, this review of previous work suggests that numerous  
236 interrelated variables influence  $\tau_c^*$ , but also that many controls on  $\tau_c^*$  may share similar  
237 sensitivites to changing bed roughness and sediment supply. ↓

## 238 1.2 Morphodynamics and hypotheses

239 Feedback between channel morphology and bedload transport defines mountain river  
240 morphodynamics. The Exner equation of sediment mass conservation quantifies how  
241 transport changes correspond to topographic changes (Paola and Voller, 2005):

$$242 \frac{\partial z}{\partial t} = - \left( \frac{1}{1 - \lambda_p} \right) \frac{\partial q_s}{\partial x} \quad (7)$$

243 where  $z$  is bed elevation (vertical position),  $x$  is horizontal position,  $t$  is time, and  $\lambda_p$  is bed  
244 porosity. In this morphodynamic equation (presented for simplicity without an uplift or  
245 subsidence term), topographic equilibrium ( $\partial z / \partial t = 0$ ) is attained when the sediment flux into  
246 a reach equals the sediment flux out ( $\partial q_s / \partial x = 0$ ). Channel morphology has long been  
247 recognized to influence sediment transport. Of particular relevance to the present work, Stark  
248 and Stark (2001) proposed a landscape evolution model with a variable called channelization  
249 that is defined as representing “the ease with which sediment can flux through a channel  
250 reach”. Conceptually, channelization characterizes how changes in reach morphology  
251 influence local transport rate. However, channelization is an abstract unitless number that  
252 does not correspond physically to any measureable aspects of morphology. A fundamental  
253 feedback is imposed in the Stark and Stark (2001) model: channelization evolves through  
254 time as a function of both sediment flux and of itself, resulting in a differential equation. The  
255 combination of local slope and channelization tend to asymptote towards values such that  
256  $\partial q_s / \partial x = 0$ , i.e. transport equilibrium. For a given upstream sediment supply rate, a modeled  
257 reach can evolve to equilibrium at different slopes (for different corresponding values of  
258 channelization) because both slope and channelization affect transport rate. Interestingly, the  
259 above definition of channelization could also be applied to  $\tau_c^*$ . Because of its control on  
260 transport rates, changes in  $\tau_c^*$  should influence channel morphodynamics, both over human  
261 timescales (e.g., in response to natural and anthropogenic perturbations such as landslides,

**Deleted:** (Ancey et al., 2008) A constant  $\tau_c^*$  is commonly assumed for gravel transport calculations, perhaps for several reasons. First, the traditional Shields diagram indicates that  $\tau_c^*$  is rather insensitive to particle Reynolds number once flow becomes hydraulically rough around grains (Buffington, 1999). Second, a belief that  $\tau_c^*$  is fundamentally a material property of a grain rather than a bed state control also remains somewhat ingrained. Third, because the best estimate of a given variable is usually its average, there is a tendency to attribute variability to measurement noise and uncertainty, even when that variability may be real, its causes understandable, and its influence potentially important to system dynamics (Jerolmack, 2011; Buffington and Montgomery, 1997).

**Formatted:** Strong

**Deleted:** balance

**Deleted:** 4

**Formatted:** Indent: First line: 0"

**Deleted:**

**Deleted:** Sediment flux and bed elevation are functions of both position and time.

**Deleted:** n insightful

**Deleted:**

**Deleted:**

**Deleted:** ¶

**Deleted:**

287 floods, post-wildfire erosion, land use, changing climate) and longer timescales (landscape  
288 evolution).

289 The overall goal of the present work is to understand and model possible feedbacks  
290 among thresholds of motion, changes in transport rate, and the morphological evolution of  
291 channels. First, I hypothesize that variability in gravel  $\tau_c^*$  is physically meaningful, and that  
292 the implicit effects of multiple processes on  $\tau_c^*$  can collectively be accounted for in terms of  
293 sediment flux dependence. Second, because changes in alluvial channel morphology are  
294 strongly coupled with sediment flux (Eq. 7), I hypothesize that the evolution of  $\tau_c^*$  can  
295 implicitly model effects of evolving channel morphology.

296 The paper is organized as follows. First, I propose a conceptual model for how  $\tau_c^*$   
297 should evolve through time as a function of sediment flux (section 2.1), and then translate this  
298 model into equations (section 2.2). Next, I describe flume experiments on disequilibrium  
299 gravel transport (section 2.3), and use these experiments to empirically calibrate  $\tau_c^*$  model  
300 parameters (sections 3.1, 3.2). After that, effects of  $\tau_c^*$  evolution on river channel  
301 morphodynamics are explored using a simple model for river channel longitudinal profile  
302 development (section 3.3). Finally, I argue that  $\tau_c^*$  is one of many morphodynamic “state  
303 variables” that describe how river channels evolve in response to external forcing and internal  
304 feedbacks. analogous to state variables in thermodynamics (section 4.2).

## 305 2 Models and Methods

### 306 2.1 Conceptual framework for $\tau_c^*$ evolution

307 The  $\tau_c^*$  model proposed below is designed to be applicable at the reach scale, over  
308 timescales ranging from changing discharge during floods to the morphodynamic evolution of  
309 channels and surrounding landscapes. By definition, models are useful representations of  
310 reality because many complexities are omitted. Although recent work demonstrates a richness  
311 of threshold and transport behavior caused by turbulent velocity fluctuations and the statistical  
312 mechanics of particle populations over short timescales (e.g., Schmeeckle and Nelson, 2003;  
313 Diplas et al., 2008; Furbish et al., 2012), these dynamics are not explicitly considered or  
314 parameterized in my deterministic model formulation.

Deleted: elucidate

Deleted:

Deleted: A motivating hypothesis is

Deleted: both

Deleted:

Deleted: reflects changes in  $\tau_c^*$  as a predictable function of sediment flux. Another hypothesis is

Deleted: B

Deleted: 4

Deleted: also

Deleted:

Deleted: ¶

Deleted:

Deleted: a conceptual model

Deleted: for why

Deleted: depend on

Deleted: is presented

Deleted: followed by

Deleted:

Deleted: mixed grain size

Deleted: are used

Deleted: The experimental data are consistent with the Wilcock and Crowe (2003) hiding function that predicts transport rates for grain size mixtures. A simple morphodynamic model is then used to evaluate how evolving  $\tau_c^*$  influences timescales of channel profile evolution.

Deleted: in the discussion section

Deleted: is argued to be

Deleted: can

Deleted: . Comparisons are made

Deleted:

Deleted: ¶

Formatted: Font: Not Bold

Deleted:

Formatted: Font: Not Bold



349 Section 1.1 shows that a great many variables and processes influence  $\tau_c^*$ . While  
350 separate models for every isolated control on  $\tau_c^*$  would be informative, it would also be  
351 difficult to combine myriad process-specific models and still meaningfully predict the  
352 temporal evolution of  $\tau_c^*$  for the morphodynamic evolution of channels. Rather than being a  
353 process “splitter“, I approach the problem as a process “lumper“: I hypothesize that many  
354 factors affecting grain mobility share common underlying dependencies on net entrainment  
355 and net deposition.

Formatted: Not Highlight

356 Consistent with the form of most bedload transport equations (e.g. Eq. 1),  $\tau_c^*$  is  
357 defined as a particular Shields stress at which only the most mobile grains of that size become  
358 entrained. However, for a population of grains of a given size on the bed surface, there should  
359 actually be a distribution of  $\tau_c^*$ —noted here as a set of values  $\{\tau_c^*\}$ --because each individual  
360 grain has a particular pocket geometry and near-bed flow velocity at its unique location, and  
361 hence a somewhat different individual threshold. Gravel flux increases with discharge  
362 primarily because thresholds are gradually exceeded for increasing proportions of surface  
363 grains of a given size. For a given transport equation (e.g. Eq. 1), a particular  $\tau_c^*$  value from  
364 the lower tail of distribution  $\{\tau_c^*\}$  should best predict sediment flux. Conceptually, an  
365 underlying assumption is that net entrainment or net deposition changes the underlying  $\{\tau_c^*\}$   
366 distribution, and therefore changes the value of  $\tau_c^*$  that best predicts transport rates.

Deleted: For bed surface grains of a given size class,  $\tau_c^*$  actually represents the stress at which only the most mobile of those grains become entrained. Individual grains will each have a different threshold based on the pocket geometry and near-bed flow velocity at its particular location, resulting in  $\tau_c^*$  probability distributions when considering all similarly sized grains (Kirchner et al., 1990; Buffington et al., 1992). Gravel flux increases with discharge primarily because thresholds are gradually exceeded for increasing proportions of surface grains of a given size. When the sediment flux entering a reach— $q_{sin}$ —is balanced by the flux exiting— $q_{out}$ —it is assumed that the  $\tau_c^*$  probability distribution does not change over time, and that  $\tau_c^*$  remains constant.

367 In the case of a channel reach undergoing net erosion ( $q_{out} > q_{sin}$ ), the most mobile  
368 individual grains—i.e. the lowest  $\tau_c^*$  values in the  $\{\tau_c^*\}$  distribution--would preferentially be  
369 entrained first, while the grains remaining on the bed would tend to have higher thresholds.  
370 Therefore, I hypothesize that progressive erosion tends to entrain grains from increasingly  
371 more stable positions on the bed, gradually increasing  $\tau_c^*$ . Conversely, during net deposition  
372 ( $q_{out} \leq q_{sin}$ ), I assume that grains tend to preferentially deposit in more stable bed positions  
373 such as local topographic lows. Continued deposition would lead to grains being deposited in  
374 progressively less stable positions, gradually decreasing  $\tau_c^*$ . These hypothesized  $\tau_c^*$  changes  
375 represent averages for the population of grains; individual grains would exhibit great

Deleted: , so  $\partial q_s / \partial x > 0$   
Deleted: P  
Deleted: will  
Deleted:  
Deleted: will  
Deleted:  
Deleted:

396 variability. For example, during net deposition individual grains would also both deposit and  
397 be entrained from more and less stable positions, but grains would have a greater probability  
398 of remaining deposited in the more stable positions.

399 Mechanistically,  $\tau_c^*$  evolution would also be driven by changes in bed topography and  
400 roughness, grain clustering and stabilizing structures, compaction of the bed and interlocking  
401 of grains, etc. None of these physical variables are explicitly included in the model equations:  
402 instead their combined effects are assumed to vary with net erosion or deposition.  
403 Importantly, the amount by which  $\tau_c^*$  changes should also depend on the current state of the  
404 bed surface. For example, starting from a relatively rough and interlocked bed surface, net  
405 deposition would initially cause relatively substantial decreases in bed roughness as local  
406 low preferentially filled with loose grains, and relatively large corresponding decreases in  
407  $\tau_c^*$ . However, for a given surface GSD there must be physical limits for bed roughness and  
408 grain packing. If bed surface grains are already relatively loose, and mobile, additional  
409 deposition would cause less of a decrease in  $\tau_c^*$ , or no decrease at all if the bed is already as  
410 unstable for a given surface GSD as it can be. Thus, the change in  $\tau_c^*$  should also be a  
411 function of  $\tau_c^*$ . The combination of processes that cause changes in  $\tau_c^*$  also place physical  
412 limits on how high, and low,  $\tau_c^*$  can evolve.

413 These  $\tau_c^*$  dependencies describe negative transport feedbacks: net erosion  
414 progressively reduces rates of erosion by making grains harder to entrain, while net deposition  
415 progressively makes grains more mobile. Through these and other morphological feedbacks,  
416 it has long been recognized that channel reaches evolve towards steady-state configurations in  
417 which the sediment flux into a reach balances the flux exiting, leading to zero net erosion or  
418 deposition (Mackin, 1948). At this statistical steady state,  $\tau_c^*$  should also be at equilibrium,  
419 and in fact is a key part of reaching channel reach equilibrium. If  $\tau_c^*$  were still systematically  
420 evolving (e.g. from continued bed state changes), then transport rate through the reach would  
421 also change, perturbing the channel away from its statistical equilibrium.

**Deleted:** These changes describe negative transport feedbacks: net erosion progressively reduces rates of erosion by making grains harder to entrain, while net deposition progressively makes grains more mobile and less likely to be deposited. ¶  
T

**Deleted:**

**Deleted:**

**Deleted:** ly packed

**Deleted:** highly

**Deleted:** little additional

**Deleted:**

**Deleted:** On the other hand, initial deposition onto a stable bed would likely cause bigger reductions in  $\tau_c^*$  than subsequent deposition. Thus, the change in  $\tau_c^*$  should also be a function of  $\tau_c^*$ .

438 2.2  $\tau_{c(q_s)}^*$  model equations

439 While the above discussion makes the case that  $\tau_c^*$  inevitably evolves through time  
 440 due to a variety of interrelated factors, the new model proposed here is specifically in terms of  
 441 sediment flux. I use the notation  $\tau_{c(q_s)}^*$  to distinguish this specific model from more general  
 442 representations of thresholds of motion in other models and analyses. Because longitudinal  
 443 coordinate  $x$  increases downstream, net erosion in a reach is indicated by  $\partial q_s / \partial x > 0$  and net  
 444 deposition by  $\partial q_s / \partial x < 0$ . The following relations are proposed:

$$445 \frac{\partial \tau_{c(q_s)}^*}{\partial t} = \begin{cases} kB \left( \frac{\partial q_s}{\partial x} \right)^{\kappa_{ent}} & \text{if } \partial q_s / \partial x > 0 \\ -k(1-B) \left( \frac{\partial q_s}{\partial x} \right)^{\kappa_{dep}} & \text{if } \partial q_s / \partial x < 0 \end{cases} \quad (8)$$

$$446 B = \frac{\tau_{c \max}^* - \tau_{c(q_s)}^*}{\tau_{c \max}^* - \tau_{c \min}^*} \quad (9)$$

447 where  $\kappa_{ent}$  and  $\kappa_{dep}$  are dimensionless exponents corresponding to entrainment and  
 448 deposition, respectively, and  $k$  is a scaling factor. These three parameters will be empirically  
 449 fit to experiments.  $\tau_{c \min}^*$  and  $\tau_{c \max}^*$  represent bounds on how low or high  $\tau_{c(q_s)}^*$  can plausibly  
 450 evolve (assumed to be 0.02 and 0.35 respectively). Eq. (8) predicts that  $\tau_{c(q_s)}^*$  incrementally  
 451 decreases with net deposition, and incrementally increases during net erosion. “Feedback  
 452 factor”  $B$  has a value between 0 and 1 and makes Eq. (8) a differential equation. It scales the  
 453 incremental change in  $\tau_{c(q_s)}^*$  so that deposition on an already “loose” bed ( $\tau_{c(q_s)}^*$  close to  
 454  $\tau_{c \min}^*$ ) minimally decreases  $\tau_{c(q_s)}^*$ , but erosion causes a larger  $\tau_{c(q_s)}^*$  increase. Conversely, if  
 455  $\tau_{c(q_s)}^*$  is already high (close to  $\tau_{c \max}^*$ ), then erosion causes a much smaller  $\tau_{c(q_s)}^*$  change than  
 456 deposition. Finally, I note that representing  $\partial \tau_{c(q_s)}^* / \partial t$  as a function of  $\partial q_s / \partial x$  (Eq. 8) is  
 457 broadly analogous in form to Exner (Eq. 7).

**Deleted:** ¶  
 <#>Two additional points need to be made. First, natural sediment is a mixture of sizes. It is common to assume that a single representative grain size, such as the median ( $D_{50}$ ), adequately describes transport of the whole mixture. Second, “thresholds” can represent different things in different models. In Eq. (1),  $\tau_c^* = \tau_c^*$  represents a modeled transport rate of zero. In other models designed to predict measurable transport rates at very low shear stresses, a non-threshold “reference” stress is instead defined as the Shields stress at which  $q_s^*$  has a very low but specific nonzero value (Parker, 1990; Wilcock and Crowe, 2003). For many applications the practical difference between threshold and reference stresses are negligible (Buffington and Montgomery, 1997), and in the present work they are largely used interchangeably. ¶

**Formatted:** Font: Not Bold

**Formatted**

**Deleted:**  $\tau_c^*$  ...-evolution

**Formatted**

**Deleted:** deposition in a reach is indicated by  $\partial q_s / \partial x < 0$  ...nd local ...et deposition by

**Deleted:** ... .. (85)

**Formatted:** Highlight

**Deleted:** 6

**Formatted:** Highlight

**Deleted:** ...These three parameters will be empirically fit

536 A limitation of Eq. (8) is that, for dimensional consistency, the units of  $k$  vary with  
 537  $\kappa_{ent}$  and  $\kappa_{dep}$ . An improved equation replaces spatial changes in flux with spatial changes in  
 538 the thickness of deposited or eroded sediment:

$$539 \frac{\partial \tau_{c(q_s)}^*}{\partial t} = \begin{cases} kA_r B \left( \frac{\partial \theta_s}{\partial x} \right)^{\kappa_{ent}} & \text{if } \partial q_s / \partial x > 0 \\ -kA_r (1-B) \left( \frac{\partial \theta_s}{\partial x} \right)^{\kappa_{dep}} & \text{if } \partial q_s / \partial x < 0 \end{cases} \quad (10)$$

540  $\theta_s$  is the thickness of sediment deposited or eroded at a given location.  $\partial \theta_s / \partial x$  is a  
 541 dimensionless ratio representing spatial changes in erosion and deposition. In this case,  $k$  has  
 542 dimensions  $1/t$  and scales how quickly  $\tau_{c(q_s)}^*$  evolves.  $\theta_s$  can be calculated by integrating Eq.  
 543 (7) over time interval  $t_1$  to  $t_2$ :

$$544 \theta_s(t_2, x) - \theta_s(t_1, x) = \frac{1}{1-\lambda_p} \int_{t_1}^{t_2} \frac{\partial q_s(t, x)}{\partial x} dt \quad (11)$$

545 (recall that  $\int_a^b (\partial f(s, t) / \partial t) dt = f(s, b) - f(s, a)$  for a generic function  $f$ ). Using discrete flume  
 546 data,  $\theta_s$  is calculated over a measurement interval  $\Delta t$  as  $(1-\lambda_p)^{-1} (\overline{q_{sout}} - \overline{q_{sin}}) \Delta t / \Delta x$ , where  
 547  $\Delta x$  is the length of the flume and the sediment flux terms are averaged over  $\Delta t$ .

548  $A_r$  is a dimensionless armoring parameter, calculated in several ways in order to  
 549 explore whether predictions can be improved by explicitly including bed surface grain size or  
 550 bed roughness characteristics. Setting  $A_r = D_{50} / D_{84}$  (the reciprical of the Recking (2012)  
 551 armoring constraint in Eq. 5 and 6) means that incremental changes to  $\tau_{c(q_s)}^*$  are larger where  
 552  $D_{50}$  is relatively closer to  $D_{84}$ . Setting  $A_r = 2D_{50} / (D_{84} - D_{16})$  suggests that  $\tau_{c(q_s)}^*$  changes  
 553 should be larger when intermediate diameters are large relative to a measure of the  
 554 normalized width of the bed surface GSD. I also try  $A_r = D_{50} / \sigma$ , where  $\sigma$  is bed surface  
 555 roughness.  $A_r = D_{50} / \sigma$  suggests that, relative to topographic lows and highs, large grains  
 556 cause bigger  $\tau_{c(q_s)}^*$  changes than small grains. Finally,  $A_r$  is simply set to 1 in some  
 557 calculations below.

Deleted: 5

Deleted: ly

Deleted:

Deleted: 7

Deleted:  $A_r$  is an optional dimensionless armoring parameter, described further below.  $\theta_s$

Deleted: ; it has dimensions of length

Deleted:  $\tau_c^*$

Deleted: 4

Deleted: 8

Deleted: While  $A_r$  is set to 1 for many calculations below, the parameter is

Deleted: Recking et al. (2012)

Formatted: Font: Italic

Formatted: Font: Italic, Subscript

Formatted: Font: Italic

Formatted: Font: Italic, Subscript

Deleted: included in order to explore whether other metrics of relative surface grain size variability or bed roughness improve predictions. For example, the rate at which  $\tau_c^*$  changes might depend on grain size relative to bed surface roughness ( $\sigma$ ), i.e.  $A_r = D_{50} / \sigma$ . Setting  $A_r = D_{50} / \sigma$  suggests that, relative to topographic lows and highs, large range cause bigger  $\tau_c^*$  changes than small grains.

579 2.3 Experimental design

580 The flume experiments used to calibrate  $k$ ,  $\mathcal{K}_{ent}$  and  $\mathcal{K}_{dep}$  were designed to explore  
 581 feedback during disequilibrium transport in gravel-bed rivers. Fig. 2 shows how transport  
 582 rates, surface  $D_{50}$  and bed slope evolved in response to fine gravel pulses. Johnson et al.  
 583 (2015) provide details of the experimental conditions and how they scale to natural conditions  
 584 most consistent with step-pool development, and so the summary here is brief. Four  
 585 experiments were conducted in a small flume 4 m long and 10 cm wide. Experiments 1 and 4  
 586 were done at 8% initial slope, and 2 and 3 at 12% initial slope; slopes subsequently evolved  
 587 fairly little during morphological adjustment (Fig. 2c). Water discharge was held constant  
 588 throughout to better isolate the influence of sediment supply changes on transport. Sediment  
 589 transported out of the flume was caught in a downstream basket, sieved and weighed. Overall  
 590 sediment diameters ranged from 0.45 to 40 mm; these sizes were sorted and painted different  
 591 colors based on five size classes with  $D_{50} = 2.4, 4.5, 8.0, 15.4,$  and  $27.2$  mm ( $D_{16} = 2.0, 3.4,$   
 592  $6.7, 12.4,$  and  $24.0$  mm;  $D_{84} = 2.8, 5.7, 10.3, 19.7,$  and  $31.3$  mm, respectively). Surface GSDs  
 593 were measured using image analysis of colored bed surface grains during the experiments.  
 594 Bed topography was measured using a triangulating laser, and bed roughness ( $\sigma$ ) was  
 595 calculated from longitudinal topographic swaths as the standard deviation of detrended bed  
 596 elevations. Water surface elevations were measured using an ultrasonic distance sensor, and  
 597 water depths were calculated by subtracting bed elevations. Total shear stress ( $\tau$ ) was  
 598 calculated assuming steady uniform flow when spatially averaged over the flume:

599 
$$\tau = \rho g h S \quad (12)$$

600 where  $h$  is water depth corrected for sidewall effects following the method of Wong and  
 601 Parker (2006), and  $S$  is water surface slope.

602 The experiments started with mixed-size sediment screeded flat. Initially, all surface  
 603 sizes were observed to be mobile (and therefore above thresholds of motion). At the  
 604 beginning no sediment was fed into the upstream end ( $q_{seed} = 0$ ), and the bed responded by  
 605 coarsening, roughening and gradually stabilizing as transport rates dropped by  $\approx 3$  orders of  
 606 magnitude (Fig. 2a). After this initial stabilization, a step-function pulse of the finest gravel  
 607 size ( $D_{50} = 2.4$  mm) was fed into the flume at  $q_{seed} = 1000$  g/min, representing an idealization  
 608 of a landslide, debris flow, post-wildfire erosion, or anthropogenic gravel augmentation that  
 609 would suddenly supply sediment finer than the existing bed surface. The feed rate was chosen

Formatted: Font: Not Bold

Deleted: The flume experiments used to calibrate  $k$ ,  $\mathcal{K}_{ent}$  and  $\mathcal{K}_{dep}$  explore how fine gravel pulses influence the morphodynamics of step-pool like channels.

Formatted: Font: Italic

Formatted: Font: Italic, Subscript

Deleted:

Deleted:

Deleted: over different time intervals

Deleted: Sediment was

Deleted: median diameters

Formatted: Font: Italic

Formatted: Font: Italic, Subscript

Formatted: Font: Italic

Formatted: Font: Italic, Subscript

Deleted:

Deleted: 9

Deleted:

Deleted: grain

Deleted: some net erosion. The bed

Deleted: stabilized

Deleted: and

Deleted: to be very low

Deleted: bed

Deleted: , or similar process

Deleted: a prolonged pulse of

629 to be similar to the high initial transport rates (Fig. 2a), while not so high as to inhibit  
 630 morphodynamic feedback by fully burying the existing bed surface. Initially some deposition  
 631 occurred on the bed, but the channel adjusted rapidly, by both entraining coarser bed surface  
 632 grains and transporting most of the finer supplied gravel, so that the outlet transport rate  
 633 ( $q_{out}$ ) approximately matched  $q_{sin}$ . After that the sediment supply pulse  $q_{sin}$  was again  
 634 dropped to zero, and the bed gradually restabilized. Johnson et al. (2015) explained in detail  
 635 how bed roughness evolved, and how the addition of finer gravels ultimately caused surface  
 636 coarsening (Fig. 2b). Unbalanced transport rates into and out of the flume demonstrate  
 637 disequilibrium conditions (Fig. 2a), although transport evolved towards equilibrium.

Deleted: t

Deleted: , asymptotically approaching though not quite attaining equilibrium transport ( $q_{out} \approx 0$ ) during the remainder of each experiment.

Formatted: Heading 2, Indent: First line: 0"

Deleted: ¶

Formatted: Font: Not Bold

Deleted: As described above,  $\tau_c^*$  is often calculated by fitting a sediment transport model to data.

Deleted: Experimental shear stresses and GSDs provide all of the variables needed to evaluate the "Surface-based Transport Model for Mixed-Size Sediment" of

## 638 2.4 The Wilcock and Crowe (2003) transport model

639 To quantify thresholds of motion from these experimental data (Fig. 2) requires a  
 640 transport model. The Wilcock and Crowe (2003) "Surface-based Transport Model for Mixed-  
 641 Size Sediment", abbreviated as W&CM, is used for two main reasons. First, the model can, at  
 642 least in principle, account for the effects of changing surface GSD on  $\tau_c^*$ . Second, the model  
 643 should also be able to account for possible effects of sand and fine gravel abundance on  
 644 thresholds of motion (Eq. 4). By using the W&CM to isolate and remove GSD effects,  
 645 experimentally-constrained thresholds of motion can then be used to evaluate the proposed  
 646  $\tau_{c(q_s)}^*$  functions (Eq. 8-11). A secondary goal is to evaluate how well the W&CM predicts  
 647 disequilibrium transport at steeper slopes and lower water depths than Wilcock and Crowe  
 648 (2003) used in their own steady-state experiments.

Deleted: A

Deleted: can

Deleted: in the present experiments, which used

Deleted: reach

Deleted: and

Deleted: relative to GSDs compared to experiments of

Deleted: In addition, disequilibrium transport was intentionally quantified during supply perturbations that caused net deposition or erosion. In contrast, the experiments Wilcock and Crowe (2003) used to calibrate their model intentionally reflected steady-state transport.

Deleted: central

Deleted:  $\tau_{rs50}$

Formatted: Font: Not Italic

Deleted: The nondimensional equivalent is  $\tau_{rs50}^*$  (Eq. 3). Rather than being an actual threshold (i.e.,  $\tau_c^*$ ),

Deleted: 10

Deleted:

649 A key variable in the W&CM is  $\tau_{rs50}^*$ , the nondimensional reference stress for the  
 650 median surface grain size ( $D_{s50}$ ).  $\tau_{rs50}^*$  corresponds to a very low transport rate of  $W_i^* = 0.002$ .  
 651  $W_i^*$  is a nondimensional bedload transport rate for grain size class  $i$ ,

$$652 W_i^* = \left( \frac{\rho_s}{\rho} - 1 \right) \frac{g q_{bi}}{F_i u_\tau^3} \quad (13)$$

653 where  $q_{bi}$  is the volumetric transport rate per unit channel width of grains of size  $i$ ,  $F_i$  is the  
 654 fraction of size  $i$  on the bed surface, and  $u_\tau$  is shear velocity ( $u_\tau = \sqrt{\tau/\rho}$ ). Wilcock and  
 655 Crowe (2003) presented an empirical relationship between transport and shear stress:

$$W_i^* = \begin{cases} 0.002 \left( \frac{\tau}{\tau_{ri}} \right)^{7.5} & \text{for } \tau/\tau_{ri} < 1.35 \\ 14 \left( 1 - \frac{0.894}{\left( \frac{\tau}{\tau_{ri}} \right)^{0.5}} \right)^{4.5} & \text{for } \tau/\tau_{ri} \geq 1.35 \end{cases} \quad (14)$$

684 where  $\tau_{ri}$  is a dimensional reference stress for size class  $i$ , with dimensionless equivalent  $\tau_{ri}^*$   
 685 (Eq. 3). A “hiding function” determines how nondimensional reference stresses vary with  
 686 grain size:

$$\frac{\tau_{ri}^*}{\tau_{rs50}^*} = \left( \frac{D_i}{D_{s50}} \right)^{b-1} \quad (15)$$

688 The hiding function exponent  $b$  is calculated as

$$b = \frac{0.67}{1 + e^{(1.5-D_i)/D_{s50}}} \quad (16)$$

690 Note that Eq. (16) is slightly modified from the exact Wilcock and Crowe (2003) version by  
 691 replacing  $D_{sm}$  (the geometric mean surface diameter) with  $D_{s50}$ , to more simply use just one  
 692 measure of the central tendency of the surface GSD.

### 693 3 Results

694 In this section, the W&CM is used to calculate best-fit thresholds of motion. Next, the  
 695  $\tau_{c(q_s)}^*$  model is shown to predict the experimentally-constrained  $\tau_{rs50}^*$  trends after calibrating  
 696 several parameters. Finally, the influence of  $\tau_{c(q_s)}^*$  on morphodynamics is explored using a  
 697 simple model for gravel-bed river profile evolution.

#### 698 3.1 Best-fit $\tau_{rs50}^*$ and hiding functions

699 The experimental data are used to determine  $W_i^*$  (Eq. 13) and  $\tau_{ri}^*$  for each of the five  
 700 grain size classes (Eq. 14). Best-fit  $\tau_{rs50}^*$  is then calculated in two ways. In the first approach,  
 701  $b$  is calculated using Eq. (16), and  $\tau_{rs50}^*$  and 95% confidence intervals are estimated using  
 702 nonlinear multiple regression in Matlab (Fig. 3, “W&CM fit”). Importantly, the temporal

Deleted: 11

Deleted: 12

Deleted: H

Deleted: 13

Deleted: the W&CM  $b$  relation was

Deleted: The additional dependence of  $\tau_{rs50}^*$  on surface sand fractions in this model will be addressed below.¶

Deleted: Johnson et al. (2015){Johnson, 2015 #4610}

Formatted: Normal, Indent: First line: 0.5"

Deleted: ¶  
 Experimental data and  $b$

Formatted: Font: Not Bold

Deleted: ,

Formatted: Font: Not Bold

Deleted: Transport rates, surface grain size, and reach slopes evolved during the experiments as the flume beds initially stabilized, then responded to the pulse of sediment supply, and finally restabilized (Fig. 2). Johnson et al. (2015) explained in detail how the addition of gravels finer than the stabilized bed surface ultimately caused further surface coarsening. Relevant to the present analysis, transport rates in and out of the flume are not always balanced (Fig. 2a), although transport evolves towards this equilibrium condition. ¶

Formatted: Indent: First line: 0.49"

Deleted: 0

Deleted: then

Deleted: 1

Deleted: simply

Deleted: 13

Deleted: . N

Deleted: (

Deleted: )

Deleted: is then used for best-fit parameter estimation of  $\tau_{rs50}^*$  and 95% confidence intervals for each experimental time step

Deleted: A key point to emphasize is that e



736 evolution of best-fit  $\tau_{rs50}^*$  is not explained by grain size changes, because the W&CM already  
737 accounts for the effects of surface GSD (Fig. 3).

738 While  $b$  varies with relative grain size in the W&CM (Eq. 16), other proposed hiding  
739 functions have found (or assumed) that a single  $b$  value applies to different grain sizes, at least  
740 for a given set of flow and surface conditions (Parker, 1990; Buscombe and Conley, 2012).

741 My second approach for estimating  $\tau_{rs50}^*$  explores whether the results are sensitive to the  
742 particular form of Eq. (16). Rather than Eq. (16), nonlinear multiple regression was used to  
743 estimate both  $b$  and  $\tau_{rs50}^*$  in Eq. (15), with separate regressions for each time step (Fig. 3). The  
744 temporal evolution of experimental  $\tau_{rs50}^*$  is generally comparable for the two different  
745 approaches (Fig. 3).

746 Interestingly, Fig. 4 shows that the hiding function exponents determined using the  
747 nonlinear multiple regressions for  $b$  and  $\tau_{rs50}^*$  are consistent with Eq. (16) of Wilcock and  
748 Crowe (2003). In spite of substantial scatter there is a slope break which corresponds to a  
749 change in  $b$  for surface grains smaller and larger than the median, suggesting that the W&CM  
750 reasonably can describe hiding and exposure relations among grains in steeper channels and  
751 for shallower flow depths than used in the Wilcock and Crowe (2003) experiments.

### 752 3.2 Calibration of $\tau_{c(q_s)}$ model parameters

753 Fig. 5 compares experimentally-constrained thresholds of motion to several predictions  
754 of these trends. First, I test whether surface sand fraction (Eq. 4) can explain the evolution of  
755  $\tau_{rs50}^*$  (Curran and Wilcock, 2005; Wilcock and Crowe, 2003). As described in section 1.1, the  
756 effect of finer grains on thresholds of motion of coarser grains is not limited to sand sizes  
757 alone (Venditti et al., 2010; Sklar et al., 2009; Johnson et al., 2015). In the Johnson et al.  
758 (2015) experiments, the finest grain size class has  $D_{50}=2.4$  mm,  $D_{16}=2.0$  mm,  $D_{84}=2.8$  mm.  
759 Setting  $F_s$  equal to the surface fraction of this size class, a nonlinear multiple regression of Eq.  
760 (4) to all four experiments together yielded a poor although statistically significant fit to the  
761 data ( $R^2=0.13$ ;  $p=3 \times 10^{-5}$ ;  $c_1=0.097 \pm 0.04$ ,  $c_2=0.103 \pm 0.11$ , and  $c_3=5.6 \pm 11$ ), confirming that  
762 surface grain size changes alone cannot explain observed  $\tau_{rs50}^*$  patterns (Fig. 5, "Sand

Deleted: xperimental ...rain size changes do not explain (...)

Deleted: Also note that a form drag correction was not done; transport was calculated in terms of total stress (Eq. 9; section 5.5).

Formatted: Highlight

Deleted: hiding function exponent ... varies with relative (...)

Deleted: The ... second approach for estimating  $\tau_{rs50}^*$  ... (...)

Formatted

Deleted: Although the 95% confidence intervals tend to be larger because both  $b$  and  $\tau_{rs50}^*$  were estimated rather than just  $\tau_{rs50}^*$ , the temporal evolution of experimental  $\tau_{rs50}^*$  ... (...)

Deleted: these experiments are ... consistent with Eq. (16) ... (...)

Deleted: (Eq. 13)... Fig. 4 shows data points determined ... (...)

Formatted: Font: Not Bold

Deleted:  $\tau_{rs50}^*$  ...-evolution (...)

Formatted: Indent: First line: 0.4"

Deleted: the experiment and W&CM-based calculation of  $\tau_{rs50}^*$  ... to several predictions of these trends. (...)

Deleted: a sand fraction dependence is explored.

Formatted

Deleted: A unique aspect of the W&CM not described above is that changes in surface sand fraction could cause temporal evolution of  $\tau_{rs50}^*$ . In particular, Wilcock and Crowe (2003) proposed that  $\tau_{rs50}^*$  varied systematically from 0.036 with no surface sand to 0.021 with abundant surface sand:¶

$$\tau_{rs50}^* = c_1 + c_2 e^{-c_3 F_s} \quad \dots \quad (14) \quad ¶$$

where  $F_s$  is the fraction of sand on the bed surface, and constants  $c_1$ ,  $c_2$  and  $c_3$  were empirically found by them to be 0.021, 0.015 and 20 respectively (for simplicity, the geometric mean reference stress was again replaced in their original equation with  $\tau_{rs50}^*$ ). Subsequent work has shown that thresholds of motion can similarly be reduced by grains substantially smaller than the bed surface but larger than sand (Venditti et al., 2010; Sklar et al., 2009; Johnson et al., 2015), suggesting that the "sand fraction" effect could also be modeled for grains larger than 2 mm. ¶ In the present experiments, the surface fraction of actual sand (<2 mm) was very small. However, because grains larger than sand but smaller than the average bed surface may also enhance mobility, we evaluate whether Eq. (14) can explain the experimentally-constrained variations in  $\tau_{rs50}^*$ . Using the surface fraction of grains < 2.8 mm (representing the smallest grain size class in the experiments)

Deleted: 1



867 fraction"). Note that I have assumed for simplicity that  $\tau_{rs50}^* \equiv \tau_{rm}^*$ , i.e. substituting the surface  
 868  $D_{50}$  for the geometric mean surface diameter in Eq. (4).  
 869 Various  $\tau_{c(q_s)}^*$  models provide better fits to experimentally-constrained  $\tau_{rs50}^*$  (Fig. 5;  
 870 Eq. 10). Models with  $A_r=1$  are shown using a single set of model parameters for all four  
 871 experiments ("collective best fit",  $k=0.17$ ,  $\kappa_{dep}=0.20$ ,  $\kappa_{ent}=0.40$ ), and also the best fit for each  
 872 experiment separately. The best-fit overall model has  $R^2=0.69$ , suggesting statistically that  
 873 effects of supply and transport disequilibrium can explain over 2/3 of the variability in  $\tau_{rs50}^*$   
 874 (Table 1). Note that  $\tau_{c(q_s)}^*$  and  $\tau_{rs50}^*$  are assumed to be interchangeable. Because Eq. (8) and  
 875 (10) are differential equations, best-fit parameters could not be calculated using nonlinear  
 876 multiple regressions. Instead, I use a brute-force approach of incrementally stepping through a  
 877 wide range of  $k$ ,  $\kappa_{dep}$  and  $\kappa_{ent}$ , and finding the combination of parameters that give the  
 878 smallest root-mean-square deviation (RMSD). These calculations started at  $\tau_{rs50}^*=0.036$  at  
 879  $t=0$ , which is consistent with the experiments, and also is the  $\tau_{rs50}^*$  proposed by Wilcock and  
 880 Crowe (2003) in the absence of sand dependence.

881 Interestingly, model fits using  $A_r = D_{50}/\sigma$  are not substantially different from  $A_r=1$ ,  
 882 and  $R^2=0.69$  is the same (Fig. 5). Table 1 includes additional regressions for  $A_r = D_{50}/D_{84}$   
 883 and  $A_r = 2D_{50}/(D_{84} - D_{16})$ . These fits overlap almost perfectly with those shown on Fig. 5.  
 884 As explained in section 1.1,  $A_r$  should account for surface GSD and bed topography  
 885 influences on thresholds. The fact that regressions are not improved by including these  
 886 variables may suggest that transport disequilibrium is a more important control on threshold  
 887 evolution over a broad range of surface GSD and bed roughness. Parameters estimated for  
 888 dimensional  $\partial q_s/\partial x$  (Eq. 8) indicate that the dimensionally balanced model performs equally  
 889 well (Table 1). Because these variants do not substantially improve  $\tau_{c(q_s)}^*$  model fits, we use  
 890 the simplest dimensionally consistent model (Eq. 10 with  $A_r=1$ ) in the analysis below.

Formatted: English (United Kingdom)

Deleted: My proposed various  $\tau_{rs50}^*$  -evolution

Deleted:

Deleted: ...Table 1 includes three ...ditional regression

Formatted

Deleted: fits overlap almost completely with those already shown.  $A_r = D_{50}/D_{s84}$  was tried, because the inverse ratio  $D_{s84}/D_{s50}$  represents the degree of armoring in the analysis of  $\tau_c^*$  supply dependence by Recking (2012).  

$$A_r = 2D_{s50}/(D_{s84} - D_{s16})$$

Deleted: was also tried as a measure of the normalized GSD width. Finally, p...arameters were ...stimated for

952 3.3 Influence of  $\tau_{c(q_s)}^*$  on morphodynamics

953 Next, an idealized morphodynamic model demonstrates how the proposed  $\tau_{c(q_s)}^*$   
 954 relations influence the evolution of channel profiles, focusing on reach slopes and timescales  
 955 of adjustment. Because the modeling goal is to isolate and understand effects of evolving  
 956  $\tau_{c(q_s)}^*$ , the underlying model is arguably the simplest reasonable representation of  
 957 morphodynamic feedback. Inspired by Parker (2005), the model describes a channel reach in  
 958 which slope evolves through aggradation and degradation. The downstream boundary  
 959 elevation is fixed (constant base level). Sediment transport and bed elevation are modeled  
 960 using Eq. (1) (substituting  $\tau_{c(q_s)}^*$  for  $\tau_c^*$  as needed) and Eq. (7) with a single grain diameter  
 961 ( $D$ ). Unit water discharge  $q_w$  is similarly held constant for simplicity. Upstream sediment  
 962 supply rate ( $q_{sfeed}$ ) is imposed, and is varied to drive channels to new steady states.  
 963 Relationships among flow depth, depth-averaged velocity and discharge are imposed by  
 964 assuming that hydraulic roughness remains constant, parameterized though a Darcy-Weisbach  
 965 hydraulic friction coefficient:

966 
$$f = \frac{8gq_w S}{U^3} \quad (17)$$

967 For a given discharge this allows both  $U$  and  $h$  to be determined:

968 
$$U = \frac{q_w}{h} \quad (18)$$

969 
$$h = q_w^{2/3} \left( \frac{f}{8gS} \right)^{1/3} \quad (19)$$

970 Two model variations are compared: in the “Exner-only” morphodynamic model,  $\tau_c^*$   
 971 is a constant. In the “Exner+ $\tau_{c(q_s)}^*$ ” variant,  $\tau_{c(q_s)}^*$  evolves through time following Eq. (10). At  
 972 equilibrium, channel slope can be predicted for both model variants (and substituting  $\tau_{c(q_s)}^*$   
 973 for  $\tau_c^*$  where appropriate) by combining Eq. (1), (2), (12) and (19):

974 
$$S_{eq} = \frac{2.83}{q_w} \left( \frac{g}{f} \right)^{1/2} D^{3/2} \left( \frac{\rho_s}{\rho} - 1 \right)^{3/2} \left[ \left( \frac{q_s^*}{3.97} \right)^{2/3} + \tau_c^* \right]^{3/2} \quad (20)$$

- Formatted: Font: Not Bold
- Deleted:  $\tau_c^*$
- Formatted: Font: Not Bold
- Deleted: evolution
- Deleted: Morphodynamic model development
- Deleted:  $\tau_c^*$
- Deleted: reach
- Deleted:
- Deleted:  $\tau_c^*$
- Deleted:
- Deleted: {Parker, 2005 #4623}
- Deleted: G. Parker’s Morphodynamics e-book,
- Deleted:
- Deleted: ¶
- Formatted: Highlight
- Deleted:
- Deleted: in simulations below
- Deleted:
- Deleted: 15
- Deleted: 16
- Deleted: 17
- Deleted: Although not presented, simulations were also done in which the relation between  $U$  and  $h$  was determined by instead holding Froude number ( $Fr = U/\sqrt{gh}$ ) constant (Grant, 1997). While  $f$  changes systematically with slope in this scenario, resulting trends in reach slope adjustment and response timescales are substantively the same as shown below for constant  $f$ , suggesting little sensitivity to the underlying hydraulic closure assumptions. ¶
- Deleted:
- Deleted: held
- Deleted:  $\tau_c^*$
- Deleted:  $\tau_c^*$
- Deleted: 7
- Deleted:
- Deleted: 9
- Formatted: Not Highlight
- Deleted: 7
- Deleted:
- Deleted: 18

1011 For a given discharge, Eq. (20) indicates that both sediment supply and the threshold of  
1012 motion influence steady-state morphology (slope).

Deleted: 18

1013 Away from equilibrium, rates of change of bed elevation along a river profile should  
1014 depend not only on the sediment flux at a given channel cross section, but also on the average  
1015 velocity at which grains move downstream. This control has occasionally been ignored in  
1016 previous models of profile evolution. In my model, it is crudely incorporated by assuming that  
1017 average bedload velocity is a consistent fraction of water velocity, broadly consistent with  
1018 previous findings that bedload velocities are proportional to shear velocity (e.g., Martin et al.,  
1019 2012). The modeling timestep is set to be equal to the time it takes sediment to move from  
1020 one model node (bed location) to the next, and is adjusted during simulations. While this  
1021 approach makes the temporal evolution of channel changes internally consistent within the  
1022 model, timescales for model response will still be much shorter than actual adjustment times  
1023 in field settings because flood intermittency is not included (so the model as implemented is  
1024 always at a constant flood discharge). In addition, the upstream sediment supply is imposed in  
1025 the model, while in natural settings hillslope-floodplain-channel coupling could greatly affect  
1026  $q_{sfeed}$  over time if significant aggradation or downcutting took place.

Deleted: change

Deleted: morphological

1027 Table 2 provides parameters used for morphodynamic modeling. Although the highly  
1028 simplified model is not intended for quantitative field comparisons, variables  $D$  ( $D_{50}=50$  mm),  
1029  $f_c(0.1)$ , and  $q_w$  ( $1 \text{ m}^2/\text{s}$ ) were chosen to be broadly consistent with a moderate ( $\approx 2$ -3 year peak  
1030 discharge recurrence interval) bedload-transporting flood in Reynolds Creek, Idaho (Olinde  
1031 and Johnson, 2015). Reynolds creek is a snowmelt-dominated channel with reach slopes that  
1032 vary widely from  $\sim 0.005$  to  $0.07$ . In an instrumented reach with a slope of  $0.02$ , Olinde (2015)  
1033 used RFID-tagged tracers and channel-spanning RFID antennas to measure  $\tau_{rs50}^* \approx 0.06$ . A  
1034 constant  $\tau_c^*=0.06$  is used for the Exner-only models, while  $\tau_{c(q_s)}^*=0.06$  is used as the initial  
1035 condition for Exner+ $\tau_{c(q_s)}^*$  models. Field constraints on upstream sediment feed rates were not  
1036 available, and so  $q_{sfeed}$  values were chosen to provide reasonable model slopes. Exponents  
1037  $\kappa_{dep}$  and  $\kappa_{ent}$  used the experimental calibrations, while  $k$  were chosen so that changes in  $\tau_c^*$   
1038 occurred over the same range of timescales as topographic adjustments, to better illustrate the  
1039 interplay of variables in morphodynamic evolution (Table 2).

Deleted:

Deleted: ,

Deleted:

Deleted:

Deleted:

Deleted: only

Deleted:  $\tau_c^*$

Deleted:  $\tau_c^*$

Deleted: with evolving  $\tau_c^*$

Deleted: U

Deleted: ( $q_{sfeed}$ )

Deleted: constrained by field data

Deleted: ed

Deleted:

1057 3.3.1 Morphodynamic model results

1058 Fig. 6 and 7 compare how longitudinal profiles respond to an increase in sediment  
1059 supply, for both the Exner-only (constant  $\tau_c^*$ ) and Exner+ $\tau_{c(q_s)}^*$  models. The initial condition  
1060 is a channel at equilibrium ( $q_{sout}=q_{sfeed}$ ). At  $t=0$ , sediment supply is increased by a factor 5.  
1061 The Exner+ $\tau_{c(q_s)}^*$  model aggrades to a new equilibrium slope that is lower than the Exner-only  
1062 model. This occurs because deposition ( $\partial q_s / \partial x < 0$ ) causes  $\tau_{c(q_s)}^*$  to decrease over time,  
1063 progressively increasing transport efficiency (i.e., higher transport rates at a lower slope)  
1064 compared to constant  $\tau_c^*=0.06$  (Fig. 7). Feedback causes the reverse effect for a decrease in  
1065  $q_{sfeed}$ :  $\tau_{c(q_s)}^*$  progressively increases as slope decreases, leading to channel re-equilibration  
1066 both sooner and at a higher slope (Fig. 7).

1067 An equilibrium timescale ( $t_{eq}$ ) is measured here as the amount of time it takes from a  
1068 supply perturbation ( $t=0$  in these models) to the slope adjusting to be within 0.0001 of its  
1069 equilibrium slope (Eq. 20). In Fig. 7,  $t_{eq}$  are substantially longer for the Exner-only models  
1070 than for the Exner+ $\tau_{c(q_s)}^*$  models. For Exner+ $\tau_{c(q_s)}^*$ , an increase in  $q_{sfeed}$  leads to aggradation,  
1071 in turn increasing local  $q_s^*$  by both increasing slope and also decreasing  $\tau_{c(q_s)}^*$  (Eq. 1, 10).  
1072 Both factors adjusting enable equilibrium to be reached sooner.

1073 Over a  $q_{sfeed}$  range of two orders of magnitude, equilibrium slopes change less for the  
1074 Exner+ $\tau_{c(q_s)}^*$  model than for Exner-only (Fig. 8a). The ratio of these equilibrium slopes  
1075 illustrates the magnitude of the change, where “ $S_{eq}$  ratio” is  $S_{eq}$  for Exner+ $\tau_{c(q_s)}^*$  divided by  
1076 Exner-only  $S_{eq}$  (Fig. 8b). An order-of-magnitude decrease in  $q_{sfeed}$  caused Exner+ $\tau_{c(q_s)}^*$   $S_{eq}$  to  
1077 be roughly 24% - 36% larger than Exner-only  $S_{eq}$ . An order-of-magnitude increase in  $q_{sfeed}$   
1078 caused Exner+ $\tau_{c(q_s)}^*$  to be roughly 20% smaller than the constant- $\tau_c^*$  model. Calculations are  
1079 also shown for several values of scaling factor  $k$ . A larger  $k$  means that  $\tau_{c(q_s)}^*$  increases or  
1080 decreases more rapidly for a given amount of aggradation or degradation (Eq. 10), which in  
1081 general enables a new equilibrium to be reached with a smaller change in slope.

Deleted: .  
Deleted: s...how longitudinal profiles respond to an ...  
Formatted: Indent: First line: 0.5"

Deleted: having ...he slope adjusting to be within 0.0001 ...

Deleted: Fig. 8a confirms, o...ver a  $q_{sfeed}$  range of two ...

Formatted: Not Highlight  
Deleted: 7  
Formatted: Highlight  
Deleted:

1145 Equilibrium timescales are quite sensitive to  $k$  as well as to sediment supply rate (Fig  
 1146 8c). Similar to the  $S_{eq}$  ratio, the “ $t_{eq}$  ratio” is  $t_{eq}$  for Exner+  $\tau_{c(q_s)}^*$  divided by  $t_{eq}$  for the Exner-  
 1147 only model (Fig. 8d). There is an asymmetry in equilibrium times for aggradation vs.  
 1148 degradation; in general the difference between Exner-only and Exner+  $\tau_{c(q_s)}^*$  is somewhat  
 1149 smaller during bed aggradation, and the difference decreases with increasing  $q_{sfeed}$ .  
 1150 Interestingly, the highest  $k$  (2.8E-5) results in a threshold-like response where the  $t_{eq}$  ratio  
 1151 rapidly increases from roughly 0.01 to 0.8 (Fig. 8d). This change occurred because  $\tau_{c(q_s)}^*$   
 1152 “bottomed out”, i.e. reached its minimum possible value ( $\tau_{c(q_s)}^* \approx \tau_{cmin}^* = 0.02$ ) before the  
 1153 equilibrium slope had been reached (Fig. 8e). At that point,  $\tau_{c(q_s)}^*$  could no longer act as a  
 1154 buffer to reduce slope changes, and it took much longer to reach an equilibrium slope.

1155 Finally, Fig. 9 shows that the spatial as well as temporal evolution of  $\tau_{c(q_s)}^*$  can  
 1156 influence river profiles. The models are the same as in Fig. 6. At  $t=0$ , the feed rate into the  
 1157 upstream-most node ( $q_{sfeed}$ ) increases by a factor of 5. Therefore, the upstream end feels the  
 1158 supply perturbation both sooner and more strongly than downstream nodes. Aggradation from  
 1159 the supply perturbation increases upstream slopes first. In the Exner-only model, downstream  
 1160 slopes gradually catch up. Because  $\tau_c^*$  stays constant, every location along the channel  
 1161 eventually asymptotes to the single slope required to transport the new  $q_{sfeed}$  at the given  
 1162 discharge (Fig. 9a). However, for evolving thresholds, enhanced upstream aggradation caused  
 1163 upstream  $\tau_{c(q_s)}^*$  to decrease both more rapidly and to lower values than downstream nodes.  
 1164 Spatial differences in  $\tau_{c(q_s)}^*$  persisted at equilibrium, resulting in spatial variations in  
 1165 equilibrium slope (Exner+  $\tau_{c(q_s)}^*$ ; Fig. 9b, 9c).

#### 1166 4 Discussion

1167 In this section, the dependence of  $\tau_{c(q_s)}^*$  on sediment supply is compared to previous  
 1168 work.  $\tau_{c(q_s)}^*$  evolution is identified as a negative feedback on morphologic change that can  
 1169 impart a memory of previous channel “states” to the system. Finally,  $\tau_{c(q_s)}^*$  is interpreted as a  
 1170 channel state variable, analogous to temperature in thermodynamics.

Deleted:  $\tau_c^*$  ..., ... $t_{eq}$  ... ived by  $t_{eq}$  for the Exner-only

Deleted:  $\tau_c^*$  ... can influence river profiles.

Formatted

Deleted: node 1, 0 km

Formatted

Deleted: Thus ...herefore, the upstream end feels the flu

Deleted:  $\tau_c^*$  ... on sediment supply is compared to previo

1215 ~~As described in section 1.1, previous work on sediment supply-dependent thresholds~~  
 1216 ~~of motion includes Recking (2012), who proposed high sediment supply ( $\tau_{mss}^*$ ; Eq. 5) and low~~  
 1217 ~~sediment supply ( $\tau_m^*$ ; Eq. 6) bounds on thresholds of motion. Fig. 10 shows how these~~  
 1218 ~~relations compare to the experimentally-constrained  $\tau_{rs50}^*$ . It should be noted again that these~~  
 1219 ~~bounds were calibrated to the  $D_{84}$  grain size rather than  $D_{50}$  (Recking, 2012). While the actual~~  
 1220 ~~values are therefore not expected to be equivalent,  $\tau_{mss}^*$  and  $\tau_m^*$  do tend to bound  $\tau_{rs50}^*$ . The~~  
 1221 ~~low-supply bound  $\tau_m^*$  is roughly 2-4 times larger than the experimental constraints. The high-~~  
 1222 ~~supply bound  $\tau_{mss}^*$  is similar in magnitude to  $\tau_{rs50}^*$  and predicts the decrease during the feed~~  
 1223 ~~period. The (linear) correlation between  $\tau_{mss}^*$  and  $\tau_{rs50}^*$  is weak ( $R^2=0.13$ ) although statistically~~  
 1224 ~~significant ( $p=3E-5$ ). Nonetheless, given that threshold of motion uncertainties are typically~~  
 1225 ~~large, Eq. (5) arguably provides a surprisingly good independent prediction of our~~  
 1226 ~~experimental disequilibrium transport data, based on experimental slope,  $D_{84}$  and  $D_{50}$ .~~

1227 ~~The  $\tau_{c(q_s)}^*$  model is consistent with previous interpretations that high sediment supply~~  
 1228 ~~corresponds to low thresholds of motion, and vice-versa (Recking, 2012; Bunte et al., 2013).~~  
 1229 ~~In the  $\tau_{c(q_s)}^*$  model (Eq. 10), an increase in upstream sediment supply that causes net~~  
 1230 ~~aggradation will lower  $\tau_{c(q_s)}^*$ , unless  $\tau_{c(q_s)}^*$  has already reached its lower physical limit ( $\tau_{c\min}^*$ ).~~  
 1231 ~~Conversely, a decrease in supply that causes net erosion will increase  $\tau_{c(q_s)}^*$ , unless  $\tau_{c(q_s)}^*$  is~~  
 1232 ~~already high ( $\approx \tau_{c\max}^*$ ). However, while the  $\tau_{c(q_s)}^*$  model can thus explain an inverse relation~~  
 1233 ~~between supply and thresholds of motion, it is worth noting that Eq. (8) and (10) describe a~~  
 1234 ~~subtly different feedback:  $\tau_{c(q_s)}^*$  does not directly increase or decrease with supply, but rather~~  
 1235 ~~with the history of sediment supply changes relative to transport capacity over time. If  $q_{sin}$~~   
 1236 ~~equals  $q_{sout}$ ,  $\tau_{c(q_s)}^*$  could remain constant regardless of whether  $q_{sin}$  is high or low.~~

#### 1237 4.1 Negative feedback and asymmetric approaches to equilibrium

1238 The evolution of  $\tau_{c(q_s)}^*$  acts as a negative feedback because it reduces the  
 1239 morphodynamic response to perturbations. Reach slopes and  $\tau_{c(q_s)}^*$  both change in the  
 1240 direction that brings transport back towards equilibrium, allowing smaller slope changes to

- Deleted: <#>Comparison to previous work¶
- Formatted: Indent: First line: 0.5"
- Deleted: .
- Deleted: compared long-term bed load monitoring record ...
- Deleted: reference stresses parameters
- Deleted: describe transport of
- Deleted: (
- Deleted: ) using a different transport model
- Deleted: Nonetheless,  $\tau_{mss}^*$  and  $\tau_m^*$  were shown to be ...
- Deleted:
- Deleted: low
- Deleted: 3
- Deleted:
- Deleted: While
- Deleted: , t
- Deleted:
- Deleted: 19
- Deleted:
- Deleted: ¶
- Formatted: Indent: First line: 0.49"
- Formatted: Not Highlight
- Deleted: W
- Deleted:  $\tau_c^*$
- Deleted: -evolution
- Deleted: is
- Deleted: not inconsistent with high sediment supply rates ...
- Deleted: 5
- Deleted: 7
- Deleted: say
- Deleted: something
- Deleted: different
- Deleted:  $\tau_c^*$
- Deleted:  $\tau_c^*$
- Deleted: will
- Deleted:
- Formatted: Font: Not Bold
- Deleted:  $\tau_c^*$
- Deleted:  $\tau_c^*$

1305 accomodate supply changes (Fig. 6, 7, 8a,b, 9). However, as with other buffered systems,  
 1306 there is a limit to how large of a perturbation can be accommodated by  $\tau_{c(q_s)}^*$  (as illustrated by  
 1307  $k=2.8E-5$  in Fig. 8c,d,e). The amount of possible  $\tau_{c(q_s)}^*$  change depends on how close  $\tau_{c(q_s)}^*$  is  
 1308 to  $\tau_{c_{min}}^*$  or  $\tau_{c_{max}}^*$  (Eq. 9). When changes in  $\tau_{c(q_s)}^*$  are negligible but transport and morphology  
 1309 are not equilibrated, then the time to equilibrium ( $t_{eq}$ ) increases because only channel  
 1310 morphology can adjust (Fig. 8c, d, e).

1311 The experiments suggest that  $\tau_{c(q_s)}^*$  changes faster in response to aggradation than  
 1312 degradation (Fig. 2, 5). This asymmetry is expressed in the best-fit exponents:  $\kappa_{dep}$  is smaller  
 1313 than  $\kappa_{ent}$  for all scenarios tested (Table 1). Note that because  $\partial\theta_s/\partial x$  is much smaller than 1  
 1314 (i.e., spatial changes in bed elevation are small compared to the horizontal distance the change  
 1315 is measured over), the smaller exponent ( $\kappa_{dep}$ ) corresponds to a larger change in  $\tau_{c(q_s)}^*$  for a  
 1316 given  $\partial\theta_s/\partial x$  (Eq. 10). For a given increment of sediment thickness ( $\theta_s$ ), aggradation is  
 1317 more efficient at decreasing  $\tau_{c(q_s)}^*$  than degradation is at increasing  $\tau_{c(q_s)}^*$ . Future work is  
 1318 required to explore how specific physical processes vary during net deposition or erosion and  
 1319 lead to asymmetry in  $\tau_{c(q_s)}^*$  change. Still, a tentative hypothesis linking bed roughness and  
 1320  $\tau_{c(q_s)}^*$  change asymmetry is that during deposition, clasts tend to deposit preferentially in  
 1321 topographic lows, because these tend to be the most sheltered locations, and simply because  
 1322 of the direction of gravity. Preferentially filling in lows tends to decrease bed roughness, in  
 1323 turn reducing topographic sheltering and hydraulic friction and increasing near-bed flow  
 1324 velocities. All of these factors decrease  $\tau_{c(q_s)}^*$ . However, erosion does not simply have an  
 1325 opposite but symmetric effect on bed topography as deposition. Clasts are not preferentially  
 1326 eroded from topographic lows, as these locations tend to remain the most sheltered. Instead,  
 1327 the process of increasing bed roughness during erosion is more complex and results from the  
 1328 more gradual development of stabilizing structures around keystone, as grains are rearranged  
 1329 locally to positions where they protrude into the flow but remain stable due to interlocking  
 1330 with surrounding grains. Thus, roughness reduction and enhancement should not equally  
 1331 sensitive to net erosion or deposition. Mao (2012) showed that bed roughness evolved at  
 1332 different rates during symmetric rising and falling limbs of hydrographs, influencing gravel

- Deleted:  $\tau_c^*$
- Deleted:
- Deleted:  $\tau_c^*$
- Deleted: the
- Deleted:  $\tau_c^*$
- Deleted: the threshold boundaries, i.e.
- Deleted: 5, 7
- Deleted:  $\tau_c^*$
- Deleted: no longer possible (or are asymptotically small
- Deleted: )
- Deleted:  $\tau_c^*$
- Deleted:
- Deleted:  $\tau_c^*$
- Deleted: 7
- Deleted:
- Deleted: Thus
- Deleted:  $\tau_c^*$
- Deleted:  $\tau_c^*$
- Deleted: , for a given increment of sediment thickness ( $\theta_s$ )

1352 transport hysteresis. Bed roughness due to sand ripple and dune evolution has also been  
1353 shown to increase and decrease at different rates during hydrograph rising and falling limbs,  
1354 leading to hysteresis in a transport system that is not threshold dominated (Martin and  
1355 Jerolmack, 2013).

1356 In Fig. 8c, the Exner+ $\tau_{c(q_s)}^*$  model indicates that equilibrium timescales are longer for  
1357 aggradation ( $q_{sfeed} / \text{initial } q_{sfeed} > 1$ ) than for degradation. At first glance this seems to  
1358 contradict the argument that aggradation is more efficient at decreasing  $\tau_{c(q_s)}^*$ . The  
1359 explanation is that the equilibrium timescale does not *only* depend on the exponents, but also  
1360 on how much total aggradation or degradation occurs to attain equilibrium. Slope changed  
1361 more during aggradation than degradation for these particular Exner+ $\tau_{c(q_s)}^*$  models, even  
1362 though  $\tau_{c(q_s)}^*$  also tended to change more during aggradation than degradation (Fig. 8a, 8e).

1363 In the experiments, average slopes changed very little in response to changes in  
1364 sediment supply and transport disequilibrium, while grain size and bed surface roughness  
1365 changed much more (Fig. 2; bed roughness is presented in detail in Johnson et al., 2015).  
1366 Because the W&CM accounted for surface grain size changes in determining experimental  
1367  $\tau_{rs50}^*$  (Fig. 3), bed roughness and various unquantified mechanisms (such as grain  
1368 interlocking) are interpreted to have physically caused the  $\tau_{rs50}^*$  evolution. What does this  
1369 suggest for  $k$ , which scales how much  $\tau_{c(q_s)}^*$  changes for a given amount of aggradation or  
1370 degradation? The best-fit  $k$  was  $2.83E-3 \text{ s}^{-1}$ , which reflects the rapid adjustment of  
1371 experimental  $\tau_{c(q_s)}^*$  compared to slope changes (Fig. 5, Table 1, Eq 10). In contrast, the  
1372 morphodynamic modeling used  $k$  values adjusted to be 2 to 3 orders of magnitude smaller, so  
1373 that the response to a perturbation in supply would involve non-negligible changes in slope  
1374 (the only morphologic variable in the simple morphodynamic model) as well as in  $\tau_{c(q_s)}^*$ .  
1375 Higher values of  $k$  in the morphodynamic model cause  $\tau_{c(q_s)}^*$  to adjust more rapidly and slope  
1376 to adjust less (Fig. 8).

1377 An implication of  $\tau_{c(q_s)}^*$  evolving with reach morphodynamics is that local channel  
1378 form can retain “memories” of previous conditions, which can influence local responses to  
1379 subsequent forcing. In Fig. 9b and 9c, an increase in supply led to the temporal and spatial

Deleted: But why then does

Deleted: indicate

Deleted: for t

Deleted:  $\tau_c^*$

Deleted: ,

Deleted: ?

Deleted: , and how quickly sediment enters or exits the reach to enable that aggradation or degradation

Deleted: More s

Deleted: occurred

Deleted:  $\tau_c^*$

Deleted: (Fig. 8a)

Deleted:  $\tau_c^*$

Deleted: by

Deleted: (Fig. 2)

Deleted: were accounted for (by the W&CM)

Deleted: (presented in detail in Johnson et al., 2015)

Deleted: other

Deleted:

Deleted:  $\tau_c^*$

Deleted: to the collective experiments

Deleted:  $\tau_c^*$

Deleted:  $\tau_c^*$

Deleted:  $\tau_c^*$

Formatted: Not Highlight

Deleted: 7

Formatted: Highlight

Deleted:

Deleted:  $\tau_c^*$

Deleted:

Deleted:  $\tau_c^*$

Deleted:

Deleted:

Deleted: <#>Memory, morphologic variability, and Reynolds Creek¶

Deleted:  $\tau_c^*$

Deleted:



1412 evolution of  $\tau_{c(q_s)}^*$ , which in turn caused spatial variations in equilibrium slope. Upstream  
 1413 reaches acted as filters of the supply perturbation to downstream reaches. In nature, spatially  
 1414 and temporally-averaged morphodynamic equilibrium will reflect “channel-forming”  
 1415 discharges and a representative sediment supply from upstream, but floods, local supply  
 1416 perturbations and history add to spatial variability in both  $\tau_{c(q_s)}^*$  and morphology. I also  
 1417 acknowledge that the model parameters were calibrated to flume experiments at steep 8% and  
 1418 12% slopes with a GSD that includes scaled boulders (Table 1; Johnson et al., 2015); future  
 1419 work is required to determine how the surface GSD influences the strength of  $\tau_{c(q_s)}^*$  evolution,  
 1420 and how well the model predicts  $\tau_{c(q_s)}^*$  changes in lower slope gravel-bed rivers.

#### 1421 4.2 State variable framework for modeling morphodynamics

1422 Next, I argue that  $\tau_{c(q_s)}^*$  should be redefined as a state variable (or state function) for  
 1423 gravel-bed channels, and outline a possible state variable approach for modeling the  
 1424 morphodynamic evolution of channels. The term “bed state” has long been informally used to  
 1425 describe collective aspects of local channel morphology, such as surface GSD and armoring  
 1426 and clustering, that change with relative ease and influence transport rates (e.g., Church,  
 1427 2006; Gomez and Church, 1989). Although explicitly defining  $\tau_{c(q_s)}^*$  evolution and related  
 1428 feedbacks in terms of state and path variables appears to be novel (to my knowledge), channel  
 1429 morphodynamics have long been implicitly described using similar ideas. For example,  
 1430 Phillips (2007) presented a qualitative conceptual model of landscape evolution in terms of  
 1431 improbable system states, arguing that although deterministic process “laws” act on  
 1432 topography, the actual outcome (i.e., any particular landscape) depends on initial conditions  
 1433 and in particular is sensitive to history. Many other works have similarly generalized complex  
 1434 channel process and response feedbacks to understand morphodynamics (e.g., Fonstad, 2003;  
 1435 Phillips, 2011, 2009; Chin and Phillips, 2007; Phillips, 1991; Stark and Stark, 2001; Yanites  
 1436 and Tucker, 2010).

1437 State variables are integral to many disciplines, including control systems engineering  
 1438 and thermodynamics. Thermodynamic state variables include temperature, pressure, enthalpy  
 1439 and entropy. By definition state variables are path-independent (Oxtoby et al., 2015). For  
 1440 example, temperature ( $T$ ) describes the amount of thermal energy per unit of a material. A

- Deleted:  $\tau_c^*$
- Deleted:
- Deleted: (here, “reach” refers to a small fraction of the total modeled longitudinal distance)
- Deleted: In contrast, slope variability developed during the transient adjustment period when  $\tau_c^*$  remained constant, but all reaches evolved to the same equilibrium slope required to transport the new supply (Fig. 9a). ¶ Natural river channels inevitably exhibit morphologic variability at reach scales. For example, although the longitudinal profile of Reynolds Creek appears smoothly concave over a spatial scale of 10 km (Fig. 11a), there is substantial slope variability when calculated for 100 m reaches (Fig. 11b). This 100 m averaging scale was chosen for the following analysis because it is sufficiently large to plausibly be used for landscape evolution modeling, while small enough to capture slope variability along a profile. ¶
- Deleted: local
- Deleted:  $\tau_c^*$
- Deleted: function
- Formatted: Font: Not Bold
- Deleted:  $\tau_c^*$
- Deleted: is an important
- Deleted: function
- Deleted:
- Deleted: describing  $\tau_c^*$
- Deleted: river
- Deleted: function
- Deleted: may
- Deleted: t
- Deleted: Phillips (2007)
- Deleted: his approach is in many ways conceptually
- Deleted: and form
- Deleted: and the importance of history
- Deleted: ,
- Deleted: and similar to
- Deleted: that describe and
- Deleted: morphology
- Deleted: or state functions
- Deleted:
- Deleted: For example,
- Deleted: are some of the many thermodynamic state
- Deleted:

1543 change in temperature depends only on the initial and final states (i.e.,  $\Delta T = T_2 - T_1$ ), but does  
 1544 not depend on the path, i.e. the history of temperatures between times  $t_2$  and  $t_1$ . In contrast,  
 1545 heat--the flow (transfer) of thermal energy--is a path variable (or process variable), not a state  
 1546 variable. Heat flow between bodies is both controlled by and changes the temperature of those  
 1547 bodies, but the amount of total heat transferred does depend on the path. Three other points  
 1548 about state variables are relevant to morphodynamics. First, state variables are rarely  
 1549 independent of one another. For example, Gibbs free energy is a state variable calculated from  
 1550 temperature, enthalpy and entropy (Hemond and Fechner, 2014). Second, although state  
 1551 variables are technically only defined at equilibrium, in practice they are useful for  
 1552 understanding gradually evolving systems (e.g., Kleidon, 2010). Third, the evolution of  
 1553 systems involving multiple state variables are usually described with coupled differential  
 1554 equations.

**Deleted:** of the material ...depends only on its ...he initial (...)

**Deleted:** traditional ...ate functions ...ariables are (...)

**Deleted:**

1555 Channel morphodynamics can be described by a similar framework of state and path  
 1556 variables. Analogous to heat, the cumulative discharges of both water and sediment are path  
 1557 variables that drive bed state evolution. Channel morphology can be described by numerous  
 1558 bed state variables, including but not limited to surface GSD, slope, width, depth, bed  
 1559 roughness, surface grain clustering, interlocking, overlap and imbrication, and finally  $\tau_{c(q_s)}^*$ .  
 1560 Analogous to temperature, I explicitly define  $\tau_{c(q_s)}^*$  as a state variable. The amount of change  
 1561 change in  $\tau_{c(q_s)}^*$  from time  $t_1$  to  $t_2$  does not depend on the progression of values in between.  
 1562 However, the amount of sediment transported between  $t_1$  and  $t_2$  does depend on the history of  
 1563  $\tau_{c(q_s)}^*$ , and also influences the history of  $\tau_{c(q_s)}^*$  (Eq. 8. 10).

**Deleted:** could ...an be described by a similar framework (...)

**Formatted:** Highlight

1564 Entropy is the state variable perhaps used most often to characterize channel systems  
 1565 (e.g., Chin and Phillips, 2007; Leopold and Langbein, 1962; Rodriguez-Iturbe and Rinaldo,  
 1566 1997). Entropy can provide a closure for underconstrained sets of equations, by assuming that  
 1567 geomorphic systems inherently maximize their entropy at equilibrium (Kleidon, 2010; Chiu,  
 1568 1987). A limitation of some maximum-entropy landscape models is that physically-based  
 1569 surface processes are not always explicitly modeled, making them less useful for predicting  
 1570 landscape responses to environmental perturbations, even if they can create reasonable  
 1571 equilibrium morphologies (Paik and Kumar, 2010). In contrast to entropy, state variable  $\tau_{c(q_s)}^*$   
 1572 has a clear process-based meaning.

**Deleted:** It is worth noting that e

**Deleted:** is often used to...an provide a closure for (...)

**Deleted:** results difficult to validate and...hem less usefu (...)

**Deleted:** function variable  $\tau^*$   $\tau^*$  (...)

1626 I suggest that landscape evolution models could incorporate subgrid-scale channel  
 1627 feedbacks by treating  $\tau_{c(q_i)}^*$  as a state variable. Conceptually, the  $\tau_{c(q_i)}^*$  model “lumps”  
 1628 processes related to multiple bed state variables (sections 1.1, 2.1). Similarly, because many  
 1629 channel state variables influence transport and therefore are not independent of  $\tau_{c(q_i)}^*$ , I  
 1630 hypothesize that aspects of morphology can be implicitly subsumed into evolving  $\tau_{c(q_i)}^*$  for  
 1631 modeling purposes, because  $\tau_{c(q_i)}^*$  captures essential feedbacks over spatial and temporal  
 1632 scales of interest. This is similar to the channelization approach of Stark and Stark (2001).

### 1633 4.3 Form drag vs. parsimony

1634 Calculations of best-fit  $\tau_{rs50}^*$  and transport rates used total shear stress (Eq. 12), rather  
 1635 than partitioning stress into form drag and a lower effective stress for calculating transport  
 1636 rates (skin friction). Although not a state variable, form drag is physically justifiable because  
 1637 larger clasts that protrude higher into the flow (e.g. stable boulders) tend to account for a  
 1638 disproportionate amount of the total stress through drag, turbulence generation and pressure  
 1639 gradients. Form drag corrections have been incorporated into many transport models to enable  
 1640 reasonable transport rates to be calculated using  $\tau_c^*$  values typical of systems without form  
 1641 drag (e.g., Rickenmann and Recking, 2011; David et al., 2011; Yager et al., 2012a).  
 1642 Conversely, another common approach (and that taken here) is simply to use higher  $\tau_c^*$  (e.g.,  
 1643 Bunte et al., 2013; Lenzi et al., 2006), consistent with acknowledging that  $\tau_c^*$  can be a  
 1644 physically meaningful fitting parameter to predict transport. Using field data, Schneider et al.  
 1645 (2015) recently compared gravel transport predictions based on (a) form drag corrections and  
 1646 (b) higher reference stresses. For the most part, they found that both approaches could provide  
 1647 similar accuracy. They also noted that “uncertainties in predicted transport rates remain huge  
 1648 (up to roughly 3 orders of magnitude)” (Schneider et al., 2015), and suggested that factors  
 1649 including supply effects may account for remaining discrepancies. Although beyond the scope  
 1650 of the present analysis, form drag effects could be separated from best-fit  $\tau_{rs50}^*$  by using a  
 1651 calculated skin friction stress rather than total stress. However, doing so would add extra  
 1652 uncertainty to the shear stresses, while still not directly accounting for effects of sediment

**Deleted:** How could a state function framework improve morphodynamic modeling and incorporate subgrid-scale channel feedbacks into broader landscape evolution models? Simplicity is important: the most insight is often gained by using the simplest possible model that can still capture essential feedbacks over spatial and temporal scales of interest. As described in the introduction, previous work has shown that  $\tau_c^*$  is influenced by many characteristics of the surrounding bed surface.

**Deleted:** In other words,  $\tau_c^*$

**Deleted:** is closely

**Deleted:** other

**Formatted:** Font: Italic

**Deleted:**

**Deleted:** It would probably be impractical to develop or apply a “complete”  $\tau_c^*$  model that explicitly incorporated separate state variables for multiple known controls on  $\tau_c^*$ .

Instead, the  $\tau_c^*$  evolution equation (Eq. 5, 7) attempts to strike a balance between predicting process in a physically justifiable (but empirically calibrated) way, while remaining broadly applicable. It could similarly be impractical to apply a “complete” reach-scale morphodynamic model that explicitly parameterized myriad feedbacks using every corresponding bed state variable. Instead

**Deleted:** bed

**Formatted:** Font: Italic

**Deleted:** actually

**Deleted:**  $\tau_c^*$

**Deleted:**  $\tau_c^*$

**Deleted:** For example, in the {Johnson, 2015 #4610@-author-year} experiments the bed responded to transport disequilibrium primarily by changing roughness but not slope. However, roughness was not an explicit, separate variable in the best-fit  $\tau_{rs50}^*$  calculations. Instead, some effects of evolving roughness and other bed state controls (imbrication, clustering) on transport rates became implicitly accounted for in the experimentally calibrated  $\tau_{rs50}^*$  ( $\approx \tau_c^*$ ). The best-fit model parameters ( $k$ ,  $K_{dep}$ ,  $K_{ent}$ ; Eq. 7; Table 1) would presumably change if a separate differential equation was developed to explicitly [...]

**Formatted:** Font: Not Bold

**Deleted:** 9

**Deleted:** used

**Deleted:** on steep channel gravel transport

**Deleted:** either

**Deleted:**

1712 supply. Implicitly subsuming form drag into  $\tau_{c(q_s)}^*$  arguably provides a simpler and more  
1713 parsimonious approach for modeling transport and morphodynamics.

## 1714 5 Conclusions

1715 I propose a new model in which feedback causes  $\tau_{c(q_s)}^*$ , the nondimensional critical shear  
1716 stress for gravel transport, to evolve through time as a function of sediment transport  
1717 disequilibrium (Eq. 8, 10). Net erosion tends to increase local  $\tau_{c(q_s)}^*$  (reducing transport rates),  
1718 while net deposition tends to decrease  $\tau_{c(q_s)}^*$  (increasing transport rates). Laboratory flume  
1719 experiments described by Johnson et al. (2015) are used to evaluate the proposed  $\tau_{c(q_s)}^*$   
1720 model. The experiments intentionally explored disequilibrium bedload transport and  
1721 morphodynamic adjustment. Thresholds of motion were back-calculated from the  
1722 experimental data using the Wilcock and Crowe (2003) model for mixed grain size transport.  
1723 I also show that the Wilcock and Crowe (2003) hiding function is consistent with our  
1724 experimental data, supporting its applicability to steep channels.

1725 After empirically calibrating three model parameters, the  $\tau_{c(q_s)}^*$  model—a differential  
1726 equation—can explain nearly 70% of the variability in experimental thresholds of motion. I  
1727 then incorporate  $\tau_{c(q_s)}^*$  into a simple morphodynamic model for channel profile evolution.  
1728 Changes in  $\tau_{c(q_s)}^*$  are negative feedbacks on morphodynamic response, because not only slope  
1729 but also  $\tau_{c(q_s)}^*$  evolve when perturbed.

1730 Finally,  $\tau_{c(q_s)}^*$  is redefined to be a state variable for fluvial channels. State functions and  
1731 path functions are fundamental to many disciplines such as thermodynamics, because they  
1732 allow the evolution of systems to be calculated. The same should be true for  
1733 morphodynamics. Conceptualizing landscape evolution models in terms of feedbacks among  
1734 evolving state variables and path functions may improve our ability to predict landscape  
1735 responses to land use, climate change and tectonic forcing.

## 1737 Acknowledgements

Deleted:  $\tau_c^*$

Deleted: Flume data and a corresponding model demonstrate that nondimensional critical shear stress ( $\tau_c^*$ )

Deleted: s

Formatted: Not Highlight

Deleted:  $\tau_c^*$

Deleted:  $\tau_c^*$

Deleted: This  $\tau_c^*$  dependence on sediment supply relative to transport capacity can plausibly explain much of the ~order-of-magnitude variability almost inevitably observed in transport threshold data (Fig. 1). This view contrasts with

Deleted: Flume experiments measured sediment transport

Deleted: , to back-calculate both hiding function exponent

Deleted: T

Deleted: provides a good prediction of our

Deleted: (including different exponents for relatively sm

Deleted: A new differential equation is proposed for

Deleted: fitting

Deleted: is

Deleted:  $\tau_c^*$ -evolution

Deleted:

Deleted:  $\tau_c^*$ .

Deleted: We

Deleted: the  $\tau_c^*$ -evolution equation

Deleted: slope

Deleted:  $\tau_c^*$

Deleted:  $\tau_c^*$

Deleted:

Deleted: Evolving  $\tau_c^*$  also reduces response timescales,

Deleted:  $\tau_c^*$

Deleted: interpreted

Deleted:

Deleted: channels; sediment transport is to heat as  $\tau_c^*$  is

Deleted: More broadly, c

Deleted: morphodynamic and

Deleted:

1808 I thank Alex Aronovitz for conducting the flume experiments, Wonsuck Kim for aiding in the  
 1809 experimental design, Lindsay Olinde for helpful discussions, and Mike Lamb and Jeff  
 1810 Prancevic for sharing their  $\tau_c^*$  compilation. I also thank Jens Turowski, two anonymous  
 1811 reviewers and AE Daniel Parsons for constructive feedback. Support came from NSF grant  
 1812 EAR-1053508.

1813

1814 **Appendix 1. List of variables**

1815  $A_r$  Dimensionless parameter for incorporating grain size or roughness ratios in  
 1816 Eq. (10) [1]

1817  $b$  Dimensionless hiding function exponent; either described by Eq. (16) or fit as  
 1818 a single value [1]

1819  $B$  Dimensionless “feedback factor”; Eq. (9) [1]

1820  $c_1, c_2, c_3$  Dimensionless empirical constants in Eq. (4) [1]

1821  $D$  Grain diameter, for model cases with a single size only [L]

1822  $D_{50}$  Median grain diameter [L]

1823  $D_{s50}$  Median grain diameter of bed surface [L]

1824  $D_i$  Grain diameter of size class  $i$  [L]

1825  $f$  Darcy-Weisbach hydraulic friction coefficient; Eq. (17) [1]

1826  $Fr$  Froude number [1]

1827  $F_i$  Areal fraction of grain size class  $i$  on the bed surface; Eq. 13 [1]

1828  $F_s$  Areal fraction of sand on the bed surface; Eq. 4 [1]

1829  $g$  Gravitational acceleration [ $LT^{-2}$ ]

1830  $h$  Water depth [L]

1831  $\kappa_{dep}$  Exponent for net deposition in  $\tau_c^*$ -evolution models; Eq. (8), (10). [1]

1832  $\kappa_{ent}$  Exponent for net erosion in  $\tau_c^*$ -evolution models; Eq. (8), (10). [1]

Deleted: .

Deleted: .

Deleted: .

Deleted: Reynolds Creek analysis and

Deleted: .

Deleted: .

Deleted: data

Deleted:

Deleted: the kind-hearted reviewers and editor.

Deleted:

Deleted:

Deleted:

Deleted: 7

Deleted: 13

Deleted: 6

Deleted: 1

Deleted: 5

Deleted: 0

Deleted: 1

Deleted: 5

Deleted: 7

Deleted: 5

Deleted: 7

|      |                   |                                                                                   |
|------|-------------------|-----------------------------------------------------------------------------------|
| 1856 | $k$               | Scaling factor for $\tau_c^*$ evolution. Dimensions are [1/T] for Eq. (10)        |
| 1857 | $\lambda_p$       | Bed porosity [1]                                                                  |
| 1858 | $q_{bi}$          | Volume sediment flux per unit width of size class $i$ in Wilcock and Crowe        |
| 1859 |                   | (2003); Eq. 13 [L <sup>2</sup> /T]                                                |
| 1860 | $q_s$             | Volume sediment flux per unit width [L <sup>2</sup> /T]                           |
| 1861 | $q_s^*$           | Nondimensional volume sediment flux; Eq. (1) [1]                                  |
| 1862 | $q_{sin}$         | Sediment flux entering a channel bed area (reach) of interest [L <sup>2</sup> /T] |
| 1863 | $q_{sout}$        | Sediment flux exiting a channel bed area (reach) of interest [L <sup>2</sup> /T]  |
| 1864 | $q_{sfeed}$       | Sediment flux entering upstream end of overall model domain [L <sup>2</sup> /T]   |
| 1865 | $q_w$             | Volume water discharge per unit width [L <sup>2</sup> /T]                         |
| 1866 | $\rho$            | Water density [M/L <sup>3</sup> ]                                                 |
| 1867 | $\rho_s$          | Sediment density [M/L <sup>3</sup> ]                                              |
| 1868 | $S$               | Water surface slope [1]                                                           |
| 1869 | $S_{eq}$          | Water surface slope when reach is at equilibrium [1]                              |
| 1870 | $\sigma$          | Bed roughness, measured here as the standard deviation of detrended bed           |
| 1871 |                   | elevations [L]                                                                    |
| 1872 | $\theta_s$        | Thickness of sediment deposited or eroded in a time interval; Eq. (10) [L]        |
| 1873 | $t$               | Time [T]                                                                          |
| 1874 | $t_{eq}$          | Equilibrium timescale for morphological adjustment [T]                            |
| 1875 | $\tau$            | Shear stress; Eq. (3), (12) [MT <sup>-2</sup> L <sup>-1</sup> ]                   |
| 1876 | $\tau^*$          | Shields stress (nondimensional shear stress) [1]                                  |
| 1877 | $\tau_c^*$        | Critical Shields stress (nondimensional critical shear stress); Eq. (1) [1]       |
| 1878 | $\tau_{c(q_s)}^*$ | Critical Shields stress in new threshold evolution model; Eq. (8), (10) [1]       |

Deleted: 7

Deleted: 0

Deleted: 7

|      |                  |                                                                                    |
|------|------------------|------------------------------------------------------------------------------------|
| 1882 | $\tau_{c\max}^*$ | Imposed maximum bound for $\tau_{c(q_s)}^*$ in Eq. (9) [1]                         |
| 1883 | $\tau_{c\min}^*$ | Imposed minimum bound for $\tau_{c(q_s)}^*$ in Eq. (9) [1]                         |
| 1884 | $\tau_{mss}^*$   | High sediment supply nondimensional reference stress end-member bound in           |
| 1885 |                  | Recking (2012) transport model; Eq. (5) [1]                                        |
| 1886 | $\tau_m^*$       | Low sediment supply nondimensional reference stress end-member bound in            |
| 1887 |                  | (Recking, 2012) transport model; Eq. (6) [1]                                       |
| 1888 | $\tau_{ri}^*$    | Reference Shields stress for size class $i$ , from Wilcock and Crowe (2003) (Eq.   |
| 1889 |                  | 15) [1]                                                                            |
| 1890 | $\tau_{rm}^*$    | Reference Shields stress for geometric mean surface diameter, Eq. (4) [1]          |
| 1891 | $\tau_{rs50}^*$  | Nondimensional reference Shields stress for surface grains of size $D_{s50}$ , Eq. |
| 1892 |                  | (15) [1]                                                                           |
| 1893 | $U$              | Depth-averaged water velocity, Eq. (17), (18) [L]                                  |
| 1894 | $u_\tau$         | Shear velocity; Eq. (13) [L/T]                                                     |
| 1895 | $x$              | Position measured horizontally (distance along channel) [L]                        |
| 1896 | $z$              | Position measured vertically (bed elevation)[L]                                    |
| 1897 | $W_i^*$          | Nondimensional bedload transport rate for grain size class $i$ , in Wilcock and    |
| 1898 |                  | Crowe (2003), Eq. (13), (14) [1]                                                   |
| 1899 | W&CM             | Abbreviation for Wilcock and Crowe (2003) transport model.                         |

1900

### 1901 Captions

1902 Figure 1. Threshold of motion data from both field and experimental studies. A power law  
1903 regression to these data gives  $R^2=0.34$ , indicating that a majority of the variability is not  
1904 explained by slope alone. Dotted lines indicate common range of  $\tau_c^*=0.03$  to 0.06 often  
1905 assumed for modeling transport, although measured data fall well out of this range. Data have  
1906 been additionally filtered to only include  $D_{50} > 2$  mm (i.e. gravel) and slopes between 0.002  
1907 and 0.2. Data were compiled and provided by Prancevic and Lamb (2015), based in part on

Deleted:  $\tau_c^*$

Deleted: 5

Deleted: , (7)

Deleted:  $\tau_c^*$

Deleted: 5

Deleted: , (7)

Deleted: 19

Deleted: 20

Formatted: Indent: Left: 0", Hanging: 0.98"

Deleted: 0

Deleted:

Deleted:

Deleted:

Deleted:

1921 Buffington and Montgomery (1997), with additional data from Olinde (2015) and Lenzi et al.  
1922 (2006).

Deleted:

1923  
1924 Figure 2. Flume experiment data (Johnson et al., 2015). a. Sediment transport rate in ( $Q_{sfeed}$ )  
1925 and out of the flume. The upstream sediment supply rate was zero other than during the  $Q_{sfeed}$   
1926 period. Experiment 1 was run for a longer duration than the others but shows similar trends.  
1927 Note that the outlet  $Q_s$  adjusts much faster to match the increase in supply than it does to  
1928 decrease during periods of no input. b. Median bed surface grain diameters decreased during  
1929 the feed of finer gravel, and then increase beyond their previous stable bed. c. Flume-averaged  
1930 bed slopes changed relatively little even as transport rates and  $D_{50}$  changed greatly in response  
1931 to initial bed stabilizing and supply perturbations.

Deleted:

Deleted:

Deleted:

Deleted:

1932  
1933 Figure 3.  $\tau_{rs50}^*$  fits to the experimental data with the W&CM. , “W&CM fit” uses Eq. (16) to  
1934 calculate hiding function exponent b, while “Power-law fit” calculates a best-fit b along with  
1935  $\tau_{rs50}^*$ . Error bars give 95% confidence intervals on  $\tau_{rs50}^*$  based on the regressions; although  
1936 uncertainty can be broad the trends are clear and consistent. Shaded area indicates times of  
1937 fine gravel addition (sediment feed) in each experiment.

Deleted:

Deleted: 3

Deleted:

Deleted:

Deleted:

1938  
1939 Figure 4. Data points are based on power-law fits to exponent  $b$ . The W&CM hiding function  
1940 (Eq. 16) does a good job matching the data, although it was not fit to these points. The first 6  
1941 measurements of each experiment (roughly the first 10 minutes) were excluded because of  
1942 large scatter associated with the greatest bed instability. The axes reflect the left and right  
1943 hand sides of Eq. (15), but uses dimensional stresses to be consistent with plots shown in  
1944 Wilcock and Crowe (2003).

Formatted: Font: Italic

Deleted: 3

Deleted:

Deleted:

Deleted: plot

Deleted: 2

Deleted: although the plot

1945  
1946 Figure 5. Best-fit models (Eq. 4, 8 and 10) compared to experimental constraints. The periods  
1947 of upstream sediment supply ( $Q_{sfeed}$ ) are indicated by the grey boxes for each experiment.

Deleted:

Deleted: 7 and

Deleted: 4

1948



1968 Figure 6. Profile evolution, comparing the morphodynamic responses of models with and  
 1969 without threshold evolution. The initial condition is an equilibrium channel with  $\tau_{c(q_s)}^* = 0.06$ ,  
 1970 upstream sediment supply  $q_s = 1e-3 \text{ m}^2/\text{s}$ , and an initial equilibrium slope of 0.0147. Sediment  
 1971 supply is increased 5x at  $t=0$ . Lines are each 5 model days apart, and indicate the evolution to  
 1972 a new transport equilibrium.

Deleted:  
 Deleted:  
 Deleted:  $\tau_c^*$   
 Deleted:  
 Formatted: Font: Italic  
 Deleted:  
 Deleted:

1974 Figure 7. Slope and critical shear stress evolution, for sediment supply increases (which  
 1975 correspond to Fig. 6 models) and decreases by factors of 5. As in figure 6,  $t=0$  corresponds to  
 1976 an equilibrium condition where the initial slope and initial threshold are consistent with the  
 1977 initial upstream sediment supply. Slope and  $\tau_{c(q_s)}^*$  were averaged over nodes 3-10, leaving out  
 1978 the first and last two nodes because of minor model boundary effects.

Deleted:  
 Formatted: Font: Italic  
 Deleted:  
 Deleted:  $\tau_c^*$   
 Deleted:

1980 Figure 8. Morphodynamic model sensitivity to sediment supply perturbations and  $k$ . All  
 1981 models started at the same equilibrium condition as shown in Fig. 6 and 7. a. Slope  
 1982 adjustment, normalized by the initial equilibrium slope. The correspondence of Eq. 20 and the  
 1983 morphodynamic model calculations demonstrate that the models did asymptotically attain  
 1984 equilibrium slopes. b.  $S_{eq}$  ratio is the ratio of equilibrium slopes of the Exner+ $\tau_{c(q_s)}^*$  model  
 1985 divided by  $S_{eq}$  for the Exner-only model, to show the relative affect that that  $\tau_c^*$  evolution has  
 1986 on equilibrium slopes. c. Equilibrium timescales for model adjustment. d.  $t_{eq}$  ratio is the ratio  
 1987 of  $t_{eq}$  for the Exner+ $\tau_{c(q_s)}^*$  model divided by  $t_{eq}$  for the Exner-only model. Values are lower  
 1988 than 1, indicating that the  $\tau_c^*$  evolution has a large influence on equilibrium timescales. e.  
 1989 Evolution of  $\tau_{c(q_s)}^*$ .

Deleted:  
 Deleted:  
 Deleted: 17  
 Deleted:  
 Deleted:  $\tau_c^*$   
 Deleted:  
 Deleted:  $\tau_c^*$   
 Deleted:  
 Deleted:  $\tau_c^*$   
 Deleted:  
 Deleted:  
 Deleted:  
 Deleted:  
 Deleted:  
 Deleted:

1991 Figure 9. Spatial and temporal evolution of morphodynamic slopes, for the same models  
 1992 shown in Fig. 6. Slope is initially at equilibrium and responds to the 5x increase in upstream  
 1993 sediment supply at  $t=0$ . a. The Exner-only model initially has spatial slope variability, but  
 1994 evolves to a uniform new equilibrium slope. b, c. In the Exner+ $\tau_{c(q_s)}^*$  model, spatial variability  
 1995 in both slope and  $\tau_{c(q_s)}^*$  persist even at equilibrium.

Formatted: Font: Italic  
 Deleted:  
 Deleted:  
 Deleted:  
 Deleted:  
 Deleted:  
 Deleted: with evolving  $\tau_c^*$   
 Deleted:  $\tau_c^*$  variability  
 Deleted:

2025  
2026  
2027  
2028  
2029  
2030  
2031

Figure 10. Comparison of experimental and best-fit model constraints on  $\tau_{rs50}^*$ , compared to proposed constraints for  $D_{84}$  reference stress bounds for low and high sediment supply from Recking (2012).

**Deleted:**

**Formatted:** Font: Italic

**Formatted:** Font: Italic, Subscript

**Deleted:** Figure 11. Comparison of Reynolds creek and  $\tau_c^*$  data compilation predictions using Eq. (18) and (21). a. Longitudinal profile based on airborne Lidar (Olinde, 2015). Upstream end (distance=0) is an arbitrary location along the channel (a bridge). Data gap at 730 m is a gauging station weir; the slope steepens downstream of the weir where the valley becomes constricted by bedrock, although the bed remains almost entirely alluvial. b. Slopes calculated (averaged) over 100 m reaches, illustrating reach-scale slope variability. c. Histogram of  $\tau_c^*$  compilation (data shown in Fig. 1), compared to  $\tau_c^*$  calculated using Eq. (21), based on Reynolds Creek 100 m slopes (panel b), and assuming  $q_w=1$  m<sup>2</sup>/s,  $Q_s^*=2e-3$ , and  $f=0.1$ . d. Similar calculation as panel c, but using Eq. 18 to solve for slope as a function of  $\tau_c^*$  from the Fig. 1 data compilation, and compared to panel b slopes.

2051 **References**

- 2052 Ancey, C., Davison, A. C., Bohm, T., Jodeau, M., and Frey, P.: Entrainment and motion of  
2053 coarse particles in a shallow water stream down a steep slope, *Journal of Fluid Mechanics*,  
2054 595, 83-114, doi:10.1017/s0022112007008774, 2008.
- 2055 Buffington, J. M., and Montgomery, D. R.: A systematic analysis of eight decades of incipient  
2056 motion studies, with special reference to gravel-bedded rivers, *Water Resources Research*, 33,  
2057 1993-2029, doi:10.1029/97wr03190, 1997.
- 2058 Buffington, J. M.: The legend of A. F. Shields, *Journal of Hydraulic Engineering-Asce*, 125,  
2059 376-387, doi:10.1061/(asce)0733-9429(1999)125:4(376), 1999.
- 2060 Bunte, K., Abt, S. R., Swingle, K. W., Cenderelli, D. A., and Schneider, J. M.: Critical  
2061 Shields values in coarse-bedded steep streams, *Water Resources Research*, 49, 7427-7447,  
2062 doi:10.1002/2012wr012672, 2013.
- 2063 Buscombe, D., and Conley, D. C.: Effective shear stress of graded sediments, *Water*  
2064 *Resources Research*, 48, 13, doi:10.1029/2010wr010341, 2012.
- 2065 Celik, A. O., Diplas, P., Dancey, C. L., and Valyrakis, M.: Impulse and particle dislodgement  
2066 under turbulent flow conditions, *Physics of Fluids*, 22, doi:10.1063/1.3385433, 2010.
- 2067 Chen, L., and Stone, M. C.: Influence of bed material size heterogeneity on bedload transport  
2068 uncertainty, *Water Resources Research*, 44, doi:10.1029/2006wr005483, 2008.
- 2069 Chin, A., and Phillips, J. D.: The self-organization of step-pools in mountain streams,  
2070 *Geomorphology*, 83, 346-358, doi:10.1016/j.geomorph.2006.02.021, 2007.
- 2071 Chiu, C. L.: Entropy and Probability Concepts in Hydraulics, *Journal of Hydraulic*  
2072 *Engineering*, 113, 583-599, doi:doi:10.1061/(ASCE)0733-9429(1987)113:5(583), 1987.
- 2073 Church, M., Hassan, M. A., and Wolcott, J. F.: Stabilizing self-organized structures in gravel-  
2074 bed stream channels: Field and experimental observations, *Water Resources Research*, 34,  
2075 3169-3179, doi:10.1029/98wr00484, 1998.
- 2076 Church, M.: Bed material transport and the morphology of alluvial river channels, *Annual*  
2077 *Review of Earth and Planetary Sciences*, 34, 325-354,  
2078 doi:10.1146/annurev.earth.33.092203.122721, 2006.
- 2079 Curran, J. C., and Wilcock, P. R.: Effect of sand supply on transport rates in a gravel-bed  
2080 channel, *Journal of Hydraulic Engineering-Asce*, 131, 961-967, doi:10.1061/(asce)0733-  
2081 9429(2005)131:11(961), 2005.
- 2082 David, G. C. L., Wohl, E., Yochum, S. E., and Bledsoe, B. P.: Comparative analysis of bed  
2083 resistance partitioning in high-gradient streams, *Water Resources Research*, 47,  
2084 doi:10.1029/2010wr009540, 2011.
- 2085 Dietrich, W. E., Kirchner, J. W., Ikeda, H., and Iseya, F.: Sediment supply and the  
2086 development of the coarse surface-layer in gravel-bedded rivers, *Nature*, 340, 215-217,  
2087 doi:10.1038/340215a0, 1989.
- 2088 Diplas, P., Dancey, C. L., Celik, A. O., Valyrakis, M., Greer, K., and Akar, T.: The Role of  
2089 Impulse on the Initiation of Particle Movement Under Turbulent Flow Conditions, *Science*,  
2090 322, 717-720, doi:10.1126/science.1158954, 2008.

2091 Fonstad, M. A.: Spatial variation in the power of mountain streams in the Sangre de Cristo  
2092 Mountains, New Mexico, *Geomorphology*, 55, 75-96, doi:10.1016/s0169-555x(03)00133-8,  
2093 2003.

2094 Furbish, D. J., Haff, P. K., Roseberry, J. C., and Schmeeckle, M. W.: A probabilistic  
2095 description of the bed load sediment flux: 1. Theory, *J. Geophys. Res.-Earth Surf.*, 117, 21,  
2096 doi:10.1029/2012jf002352, 2012.

2097 Gilbert, G. K.: The transportation of debris by running water, United States Geological  
2098 Survey Professional Paper, 86, 1914.

2099 Gogus, M., and Defne, Z.: Effect of shape on incipient motion of large solitary particles,  
2100 *Journal of Hydraulic Engineering-Asce*, 131, 38-45, doi:10.1061/(asace)0733-  
2101 9429(2005)131:1(38), 2005.

2102 Gomez, B., and Church, M.: An assessment of bed load sediment transport formulae for  
2103 gravel rivers, *Water Resources Research*, 25, 1161-1186, doi:10.1029/WR025i006p01161,  
2104 1989.

2105 Hemond, H. F., and Fechner, E. J.: *Chemical fate and transport in the environment*, Elsevier,  
2106 2014.

2107 Iseya, F., and Ikeda, H.: Pulsations in Bedload Transport Rates Induced by a Longitudinal  
2108 Sediment Sorting - a Flume Study Using Sand and Gravel Mixtures, *Geogr. Ann. Ser. A-  
2109 Phys. Geogr.*, 69, 15-27, 1987.

2110 Jackson, W. L., and Beschta, R. L.: Influences of increased sand delivery on the morphology  
2111 of sand and gravel channels, *JAWRA Journal of the American Water Resources Association*,  
2112 20, 527-533, doi:10.1111/j.1752-1688.1984.tb02835.x, 1984.

2113 Jerolmack, D. J.: Causes and effects of noise in landscape dynamics, *Eos, Transactions  
2114 American Geophysical Union*, 92, 385-386, doi:10.1029/2011EO440001, 2011.

2115 Johnson, J. P. L., Aronovitz, A. C., and Kim, W.: Coarser and rougher: Effects of fine gravel  
2116 pulses on experimental step-pool channel morphodynamics, *Geophys. Res. Lett.*, 42, 8432-  
2117 8440, doi:10.1002/2015gl066097, 2015.

2118 Kirchner, J. W., Dietrich, W. E., Iseya, F., and Ikeda, H.: The Variability of Critical Shear-  
2119 Stress, Friction Angle, and Grain Protrusion in Water-Worked Sediments, *Sedimentology*, 37,  
2120 647-672, doi:10.1111/j.1365-3091.1990.tb00627.x, 1990.

2121 Kleidon, A.: A basic introduction to the thermodynamics of the Earth system far from  
2122 equilibrium and maximum entropy production, *Philos. Trans. R. Soc. B-Biol. Sci.*, 365, 1303-  
2123 1315, doi:10.1098/rstb.2009.0310, 2010.

2124 Lamb, M. P., Dietrich, W. E., and Venditti, J. G.: Is the critical Shields stress for incipient  
2125 sediment motion dependent on channel-bed slope?, *Journal of Geophysical Research*, 113,  
2126 F02008, doi:10.1029/2007jf000831, 2008.

2127 Lenzi, M. A., Mao, L., and Comiti, F.: When does bedload transport begin in steep boulder-  
2128 bed streams?, *Hydrological Processes*, 20, 3517-3533, doi:10.1002/hyp.6168, 2006.

2129 Leopold, L. B., and Langbein, W. B.: *The concept of entropy in landscape evolution*, US  
2130 Government Printing Office Washington, DC, USA, 1962.

2131 Mackin, J. H.: Concept of the graded river, *Geol. Soc. Am. Bull.*, 101, 1373-1388, 1948.

2132 Mao, L. C.: The effect of hydrographs on bed load transport and bed sediment spatial  
2133 arrangement, *J. Geophys. Res.-Earth Surf.*, 117, doi:10.1029/2012jf002428, 2012.

2134 Marquis, G. A., and Roy, A. G.: Using multiple bed load measurements: Toward the  
2135 identification of bed dilation and contraction in gravel-bed rivers, *J. Geophys. Res.-Earth*  
2136 *Surf.*, 117, 16, doi:10.1029/2011jf002120, 2012.

2137 Martin, R. L., Jerolmack, D. J., and Schumer, R.: The physical basis for anomalous diffusion  
2138 in bed load transport, *J. Geophys. Res.-Earth Surf.*, 117, 18, doi:10.1029/2011jf002075, 2012.

2139 Martin, R. L., and Jerolmack, D. J.: Origin of hysteresis in bed form response to unsteady  
2140 flows, *Water Resources Research*, 49, 1314-1333, doi:10.1002/wrcr.20093, 2013.

2141 Measures, R., and Tait, S.: Quantifying the role of bed surface topography in controlling  
2142 sediment stability in water-worked gravel deposits, *Water Resources Research*, 44,  
2143 doi:10.1029/2006wr005794, 2008.

2144 Meyer-Peter, E., and Müller, R.: Formulas for bed-load transport, *Proceedings, Second*  
2145 *Congress, International Association for Hydraulic Structures Research, Stockholm*, 39-64,  
2146 1948.

2147 Nelson, P. A., Venditti, J. G., Dietrich, W. E., Kirchner, J. W., Ikeda, H., Iseya, F., and Sklar,  
2148 L. S.: Response of bed surface patchiness to reductions in sediment supply, *J. Geophys. Res.-*  
2149 *Earth Surf.*, 114, doi:10.1029/2008jf001144, 2009.

2150 Nitsche, M., Rickenmann, D., Turowski, J. M., Badoux, A., and Kirchner, J. W.: Evaluation  
2151 of bedload transport predictions using flow resistance equations to account for macro-  
2152 roughness in steep mountain streams, *Water Resources Research*, 47,  
2153 doi:10.1029/2011wr010645, 2011.

2154 Ockelford, A.-M., and Haynes, H.: The impact of stress history on bed structure, *Earth*  
2155 *Surface Processes and Landforms*, 38, 717-727, doi:10.1002/esp.3348, 2013.

2156 Olinde, L.: Displacement and entrainment behavior of bedload clasts in mountain streams,  
2157 Ph.D., Geological Sciences, The University of Texas at Austin, Austin, Texas, 139 pp., 2015.

2158 Olinde, L., and Johnson, J. P. L.: Using RFID and accelerometer-embedded tracers to  
2159 measure probabilities of bed load transport, step lengths, and rest times in a mountain stream,  
2160 *Water Resources Research*, 51, 7572-7589, doi:10.1002/2014wr016120, 2015.

2161 Oxtoby, D., Gillis, H., and Butler, L.: *Principles of modern chemistry*, Cengage Learning,  
2162 2015.

2163 Paik, K., and Kumar, P.: Optimality approaches to describe characteristic fluvial patterns on  
2164 landscapes, *Philos. Trans. R. Soc. B-Biol. Sci.*, 365, 1387-1395, doi:10.1098/rstb.2009.0303,  
2165 2010.

2166 Paola, C., and Voller, V. R.: A generalized Exner equation for sediment mass balance, *J.*  
2167 *Geophys. Res.-Earth Surf.*, 110, F04014, doi:10.1029/2004JF000274., 2005.

2168 Parker, G., and Klingeman, P. C.: On Why Gravel Bed Streams Are Paved, *Water Resources*  
2169 *Research*, 18, 1409-1423, doi:10.1029/WR018i005p01409, 1982.

2170 Parker, G., Klingeman, P. C., and McLean, D. G.: Bedload size distribution in paved gravel-  
2171 bed streams, *American Society of Civil Engineers, Journal of Hydraulics Division*, 108, 1757-  
2172 1760, 1982.

2173 Parker, G.: Surface-based bedload transport relation for gravel rivers, *Journal of Hydraulic*  
2174 *Research*, 28, 417-436, doi:10.1080/00221689009499058, 1990.

2175 Parker, G., and Toro-Escobar, C. M.: Equal mobility of gravel in streams: The remains of the  
2176 day, *Water Resources Research*, 38, doi:10.1029/2001wr000669, 2002.

2177 Phillips, C. B., Martin, R. L., and Jerolmack, D. J.: Impulse framework for unsteady flows  
2178 reveals superdiffusive bed load transport, *Geophys. Res. Lett.*, 40, 1328-1333,  
2179 doi:10.1002/grl.50323, 2013.

2180 Phillips, J. D.: Multiple modes of adjustment in unstable river channel cross-sections, *Journal*  
2181 *of Hydrology*, 123, 39-49, doi:10.1016/0022-1694(91)90067-R, 1991.

2182 Phillips, J. D.: The perfect landscape, *Geomorphology*, 84, 159-169,  
2183 doi:10.1016/j.geomorph.2006.01.039, 2007.

2184 Phillips, J. D.: Changes, perturbations, and responses in geomorphic systems, *Progress in*  
2185 *Physical Geography*, 33, 17-30, doi:10.1177/0309133309103889, 2009.

2186 Phillips, J. D.: Emergence and pseudo-equilibrium in geomorphology, *Geomorphology*, 132,  
2187 319-326, doi:10.1016/j.geomorph.2011.05.017, 2011.

2188 Powell, D. M., and Ashworth, P. J.: Spatial pattern of flow competence and bed-load transport  
2189 in a divided gravel-bed river, *Water Resources Research*, 31, 741-752,  
2190 doi:10.1029/94wr02273, 1995.

2191 Prancevic, J. P., and Lamb, M. P.: Unraveling bed slope from relative roughness in initial  
2192 sediment motion, *J. Geophys. Res.-Earth Surf.*, 120, 474-489, doi:10.1002/2014jf003323,  
2193 2015.

2194 Recking, A.: Influence of sediment supply on mountain streams bedload transport,  
2195 *Geomorphology*, 175, 139-150, doi:10.1016/j.geomorph.2012.07.005, 2012.

2196 Richards, K., and Clifford, N.: Fluvial geomorphology: structured beds in gravelly rivers,  
2197 *Progress in Physical Geography*, 15, 407-422, doi:10.1177/030913339101500404, 1991.

2198 Rickenmann, D.: Comparison of bed load transport in torrents and gravel bed streams, *Water*  
2199 *Resources Research*, 37, 3295-3305, doi:10.1029/2001WR000319, 2001.

2200 Rickenmann, D., and Recking, A.: Evaluation of flow resistance in gravel-bed rivers through  
2201 a large field data set, *Water Resources Research*, 47, doi:10.1029/2010wr009793, 2011.

2202 Rodriguez-Iturbe, I., and Rinaldo, A.: *Fractal River Networks: Chance and Self-*  
2203 *Organization*, Cambridge University Press, New York, 1997.

2204 Sanguinito, S., and Johnson, J.: Quantifying gravel overlap and dislodgement forces on  
2205 natural river bars: implications for particle entrainment, *Earth Surface Processes and*  
2206 *Landforms*, 37, 134-141, doi:10.1002/esp.2237, 2012.

2207 Schmeeckle, M. W., and Nelson, J. M.: Direct numerical simulation of bedload transport  
2208 using a local, dynamic boundary condition, *Sedimentology*, 50, 279-301, doi:10.1046/j.1365-  
2209 3091.2003.00555.x, 2003.

2210 Schneider, J. M., Rickenmann, D., Turowski, J. M., Bunte, K., and Kirchner, J. W.:  
2211 Applicability of bed load transport models for mixed-size sediments in steep streams  
2212 considering macro-roughness, *Water Resources Research*, 51, 5260-5283,  
2213 doi:10.1002/2014wr016417, 2015.

2214 Shvidchenko, A. B., and Pender, G.: Flume study of the effect of relative depth on the  
2215 incipient motion of coarse uniform sediments, *Water Resources Research*, 36, 619-628,  
2216 doi:10.1029/1999wr900312, 2000.

2217 Sklar, L. S., Fadde, J., Venditti, J. G., Nelson, P., Wyzga, M. A., Cui, Y. T., and Dietrich, W.  
2218 E.: Translation and dispersion of sediment pulses in flume experiments simulating gravel  
2219 augmentation below dams, *Water Resources Research*, 45, doi:10.1029/2008wr007346, 2009.

2220 Stark, C. P., and Stark, G. J.: A channelization model of landscape evolution, *American*  
2221 *Journal of Science*, 301, 486-512, doi:10.2475/ajs.301.4-5.486, 2001.

2222 Strom, K. B., and Papanicolaou, A. N.: Occurrence of cluster microforms in mountain rivers,  
2223 *Earth Surface Processes and Landforms*, 34, 88-98, doi:10.1002/esp.1693, 2009.

2224 Turowski, J. M., Badoux, A., and Rickenmann, D.: Start and end of bedload transport in  
2225 gravel-bed streams, *Geophys. Res. Lett.*, 38, L04401, doi:10.1029/2010gl046558, 2011.

2226 Valyrakis, M., Diplas, P., Dancey, C. L., Greer, K., and Celik, A. O.: Role of instantaneous  
2227 force magnitude and duration on particle entrainment, *J. Geophys. Res.-Earth Surf.*, 115,  
2228 doi:10.1029/2008jf001247, 2010.

2229 Venditti, J. G., Dietrich, W. E., Nelson, P. A., Wyzga, M. A., Fadde, J., and Sklar, L.:  
2230 Mobilization of coarse surface layers in gravel-bedded rivers by finer gravel bed load, *Water*  
2231 *Resour. Res.*, 46, doi:10.1029/2009wr008329, 2010.

2232 Wilcock, P. R., and Crowe, J. C.: Surface-based transport model for mixed-size sediment,  
2233 *Journal of Hydraulic Engineering-Asce*, 129, 120-128, doi:10.1061/(asce)0733-  
2234 9429(2003)129:2(120), 2003.

2235 Wong, M., and Parker, G.: Reanalysis and Correction of Bed-Load Relation of Meyer-Peter  
2236 and Müller Using Their Own Database, *Journal of Hydraulic Engineering*, 132, 1159-1168,  
2237 doi:doi:10.1061/(ASCE)0733-9429(2006)132:11(1159), 2006.

2238 Yager, E. M., Dietrich, W. E., Kirchner, J. W., and McArdell, B. W.: Prediction of sediment  
2239 transport in step-pool channels, *Water Resources Research*, 48, doi:10.1029/2011wr010829,  
2240 2012a.

2241 Yager, E. M., Turowski, J. M., Rickenmann, D., and McArdell, B. W.: Sediment supply,  
2242 grain protrusion, and bedload transport in mountain streams, *Geophys. Res. Lett.*, 39,  
2243 doi:10.1029/2012gl051654, 2012b.

2244 Yanites, B. J., and Tucker, G. E.: Controls and limits on bedrock channel geometry, *J.*  
2245 *Geophys. Res.-Earth Surf.*, 115, 17, doi:10.1029/2009jf001601, 2010.

2246
