# Supplementary material for: Gravel threshold of motion: A state function of sediment transport disequilibrium?
Source: Copernicus journal article supplement (doi:10.5194/esurf-2015-52), 2016-01-19
Supplement: Supplementary file [file esurf-2015-52-AC6-supplement.pdf]

# 1 Gravel threshold of motion: A state function of sediment 2 transport disequilibrium?

3

4 **Joel P. L. Johnson**

5 Department of Geological Sciences, The University of Texas at Austin

6 Correspondence to: [joelj@jsg.utexas.edu](mailto:joelj@jsg.utexas.edu)

7

## 8 **Abstract**

9 In most sediment transport models, a threshold variable dictates the shear stress at which non-  
10 negligible bedload transport begins. Previous work has demonstrated that nondimensional  
11 transport thresholds ( $\tau_c^*$ ) vary with many factors related not only to grain size and shape, but  
12 also with characteristics of the local bed surface and sediment transport rate ( $q_s$ ). I propose a  
13 new model in which  $q_s$ -dependent  $\tau_c^*$ , notated as  $\tau_{c(q_s)}^*$ , evolves as a power-law function of  
14 net erosion or deposition. In the model, net entrainment is assumed to progressively remove  
15 more mobile particles while leaving behind more stable grains, gradually increasing  $\tau_{c(q_s)}^*$  and  
16 reducing transport rates. Net deposition tends to fill in topographic lows, progressively  
17 leading to less stable distributions of surface grains, decreasing  $\tau_{c(q_s)}^*$  and increasing transport  
18 rates. Model parameters are calibrated based on laboratory flume experiments that explore  
19 transport disequilibrium. The  $\tau_{c(q_s)}^*$  equation is then incorporated into a simple  
20 morphodynamic model. The evolution of  $\tau_{c(q_s)}^*$  is a negative feedback on morphologic  
21 change, while also allowing reaches to equilibrate to sediment supply at different slopes.  
22 Finally,  $\tau_{c(q_s)}^*$  is interpreted to be an important but nonunique state variable for  
23 morphodynamics, in a manner consistent with state variables such as temperature in  
24 thermodynamics.

25

## 26 1 Motivation

27 Despite over a century of quantitative study (Gilbert, 1914), it often remains  
28 challenging to predict gravel transport rates to much better than an order of magnitude  
29 because of the complexity of grain interactions with the flow and the surrounding grains (e.g.,  
30 Schneider et al., 2015; Nitsche et al., 2011; Rickenmann, 2001; Wilcock and Crowe, 2003;  
31 Chen and Stone, 2008). Predictive models for complex systems often derive utility from their  
32 simplicity, as is the case with the widely-used Meyer-Peter and Müller (1948) transport  
33 equation, as modified by Wong and Parker (2006):

$$34 \quad q_s^* = 3.97(\tau^* - \tau_c^*)^{1.5} \quad \text{for} \quad \tau^* \geq \tau_c^* \quad (1)$$

35 where  $q_s^*$  is a nondimensional sediment transport rate per unit width,  $\tau^*$  is a nondimensional  
36 shear stress imparted by the fluid on the channel bed (a Shields stress), and  $\tau_c^*$  is the  
37 nondimensional threshold stress at which grains begin to move (a critical Shields stress).  
38 Variables are nondimensionalized as follows:

$$39 \quad q_s^* = \frac{q_s}{D \sqrt{\left(\frac{\rho_s}{\rho} - 1\right) g D}} \quad (2)$$

$$40 \quad \tau^* = \frac{\tau}{(\rho_s - \rho) g D} \quad (3)$$

41 where  $q_s$  is volume sediment transport rate per unit width ( $\text{m}^2/\text{s}$ ),  $D$  is grain diameter (m),  
42  $\rho_s$  is sediment density ( $\text{m}^3/\text{kg}$ ),  $\rho$  is water density ( $\text{m}^3/\text{kg}$ ),  $g$  is gravitational acceleration  
43 ( $\text{m}/\text{s}^2$ ), and  $\tau$  is shear stress (Pa). In principle, these nondimensionalizations should account  
44 for differences in grain size, fluid and sediment density and gravity, allowing meaningful  
45 comparisons of transport and stress across different conditions. For a given grain diameter  
46 (and constant  $\rho_s$ ,  $\rho$  and  $g$  assumed for terrestrial landscapes), the simplicity of Eq. (1) is  
47 that it predicts transport rate using just two variables,  $\tau^*$  (a function of flow strength) and  $\tau_c^*$   
48 (a function of many variables). In practice,  $\tau_c^*$  is often back-calculated from shear stress and  
49 bedload transport rate, essentially making it an empirical fitting parameter for a given  
50 transport model (e.g., Wong and Parker, 2006; Buffington and Montgomery, 1997). For  
51 example, using the original dataset of Meyer-Peter and Muller (1948),  $\tau^*$  and  $q_s^*$  give best-fit

52  $\tau_c^*=0.0495$  for Eq. (1) (Wong and Parker, 2006). Other bedload transport models have been  
53 developed that do not use an absolute threshold stress below which transport is zero, but  
54 rather a “reference” stress that corresponds to a very low but non-zero transport rate (e.g.  
55 Parker, 1990; Wilcock and Crowe, 2003). For most applications the practical difference  
56 between threshold and reference stresses are negligible (Buffington and Montgomery, 1997).  
57 In the present work, threshold and reference stresses are used interchangeably.

58         Thresholds of motion for gravel often span an order of magnitude or more (Fig. 1).  
59 Variability in  $\tau_c^*$  greatly influences bedload flux predictions in mountain rivers because  
60 transport typically occurs close to thresholds conditions, even during large floods (Phillips et  
61 al., 2013; Parker et al., 1982; Parker and Klingeman, 1982). Previous work has demonstrated  
62 that a great many factors collectively cause  $\tau_c^*$  scatter (e.g., Buffington and Montgomery,  
63 1997; Kirchner et al., 1990). Slope can empirically explain 34% of the variability shown in  
64 Fig. 1 data. However, other variables including the strength of turbulent velocity fluctuations,  
65 and flow depth relative to bed roughness, also vary with reach slope and have been interpreted  
66 to influence  $\tau_c^*$  mechanistically (Lamb et al., 2008). In addition, thresholds can change  
67 temporally: using field data, Turowski et al. (2011) demonstrated that threshold discharges for  
68 the start and end of bedload transport could change by an order of magnitude during a given  
69 flood event.

70         Although thresholds of motion may dynamically evolve over time, we suggest several  
71 reasons why an assumption of constant  $\tau_c^*$  remains ingrained in some studies. First, the  
72 traditional Shields diagram indicates that  $\tau_c^*$  is rather insensitive to particle Reynolds number  
73 once flow becomes hydraulically rough around grains (Buffington, 1999). Second, because  
74 the best estimate of a given variable is usually its average, there is a tendency to attribute  
75 variability to measurement noise and uncertainty, even when that variability may be real,  
76 understandable, and important to system dynamics (Jerolmack, 2011; Buffington and  
77 Montgomery, 1997; Chen and Stone, 2008). Third, a broadly applicable model for the  
78 temporal evolution of  $\tau_c^*$  has arguably not been developed, although progress has been made  
79 (Recking, 2012; Bunte et al., 2013; Wilcock and Crowe, 2003). Next in this section, I  
80 summarize previous work on  $\tau_c^*$  controls, suggest ways that evolving  $\tau_c^*$  may influence

81 gravel-bed river morphodynamics, and then propose specific hypotheses to be explored with a  
82 new model for  $\tau_c^*$  evolution.

### 83 1.1 Previous work: mechanistic controls on $\tau_c^*$

84 In order to review previous work in an organized manner, factors affecting  $\tau_c^*$  are  
85 categorized as (a) grain controls, (b) bed state controls, (c) discharge controls, and (d)  
86 sediment flux controls, while acknowledging that many specific factors are interrelated and  
87 can be classified in more than one category. The literature on thresholds of motion is vast; I  
88 highlight select papers while acknowledging that many contributions are not explicitly  
89 reviewed.

90 Grain controls are physical characteristics of individual clasts that influence  $\tau_c^*$ . In  
91 addition to diameter and density, these include shape and angularity (e.g., Prancevic and  
92 Lamb, 2015; Gogus and Defne, 2005). By controlling surface grain size, armoring acts as a  
93 grain control (e.g., Dietrich et al., 1989; Parker and Toro-Escobar, 2002). However, the grain  
94 size distribution (GSD) of the surrounding bed has also been shown to strongly influence  $\tau_c^*$ ;  
95 armoring can therefore also be a bed state control. In many mixed grain size transport models,  
96 hiding/exposure functions quantify the observation that grains smaller than the average bed  
97 surface tend to be relatively less mobile than expected based on diameter alone, while grains  
98 larger than average tend to be relatively more mobile than expected based on their diameter  
99 (e.g., Parker, 1990; Wilcock and Crowe, 2003). Spatial heterogeneity in surface GSDs,  
100 whether randomly distributed or sorted into patches, can also influence local  $\tau_c^*$  (Chen and  
101 Stone, 2008; Nelson et al., 2009). Mechanistically, contrasts in diameter between a grain and  
102 the surrounding bed affects pocket geometry. On rougher beds, grains tend to protrude less  
103 into the flow and therefore tend to be more stable (higher  $\tau_c^*$ ).

104 Sand content is a related GSD bed state control: increasing sand content of alluvial  
105 bed surfaces has been shown to decrease gravel thresholds of motion (e.g., Curran and  
106 Wilcock, 2005; Iseya and Ikeda, 1987; Jackson and Beschta, 1984). Wilcock and Crowe  
107 (2003) explicitly incorporated this sand dependence into their transport model:

$$108 \tau_{rm}^* = c_1 + c_2 e^{-c_3 F_s} \quad (4)$$

109 where  $\tau_{rm}^*$  is a reference stress (rather than an absolute threshold) for the geometric mean  
110 diameter of the bed surface GSD,  $F_s$  is the spatial fraction of sand on the bed surface, and  
111 constants  $c_1$ ,  $c_2$  and  $c_3$  were empirically calibrated from flume data to be 0.021, 0.015 and 20  
112 respectively. These values result in  $\tau_{rm}^*$  varying between 0.021 and 0.036, which is in the  
113 range of typical  $\tau_c^*$  (Figure 1). Subsequent work has shown that the effects described by Eq. 4  
114 are not unique to sand sizes only. Thresholds of motion for intermediate surface diameters  
115 (e.g.  $D_{50}$ ) can similarly be reduced by grains substantially smaller than the bed surface but  
116 larger than 2mm (Venditti et al., 2010; Sklar et al., 2009; Johnson et al., 2015).  
117 Mechanistically, the addition of sand or finer gravels smooths the bed surface by  
118 preferentially filling local topographic lows, which can affect pocket geometries (making it  
119 easier for larger grains to rotate out of a stable position), and also reduce local hydraulic  
120 roughness, increasing near-bed velocity and increasing drag on protruding grains.

121 Many studies have explored the bed state control of stabilizing structures formed by  
122 coarse grain clusters (e.g., Church et al., 1998; Strom and Papanicolaou, 2009). Other bed  
123 state controls include the degree of overlap, interlocking and imbrication among grains, and  
124 bed compaction or dilation (e.g., Parker, 1990; Wilcock and Crowe, 2003; Sanguinito and  
125 Johnson, 2012; Buscombe and Conley, 2012; Mao, 2012; Kirchner et al., 1990; Strom and  
126 Papanicolaou, 2009; Marquis and Roy, 2012; Powell and Ashworth, 1995; Richards and  
127 Clifford, 1991; Ockelford and Haynes, 2013). By combining experimental data and a  
128 numerical model, Measures and Tait (2008) show that increasing grain-scale bed roughness  
129 tends to shelter downstream grains, reducing entrainment. Mechanistically, these factors attest  
130 to how, even if grain size does not change, grains can move from less stable to more stable  
131 configurations. Coarse grain clusters can also enhance bed stability by increasing surface  
132 roughness, tending to deepen potential grain pockets.

133 Flow characteristics influencing  $\tau_c^*$  include particle Reynolds number, flow depth  
134 relative to grain size, the intensity of turbulence, the history of prior flow both above and  
135 below transport thresholds, and the partitioning of stress into form drag and skin friction (e.g.,  
136 Shvidchenko and Pender, 2000; Ockelford and Haynes, 2013; Schneider et al., 2015;  
137 Valyrakis et al., 2010; Celik et al., 2010). Most flow-dependent controls are not independent  
138 of the bed surface controls. For example, flow depths, turbulence and form drag depend on  
139 slope and bed roughness, while the stress history influences  $\tau_c^*$  by changing grain interlocking

140 and surface roughness. Mao (2012) showed that thresholds of motion and bed roughness both  
141 evolved during hydrograph rising and falling limbs, leading to bedload hysteresis.

142 Recent work also suggests that sediment transport can affect  $\tau_c^*$ , with higher rates of  
143 upstream supply corresponding to more mobile sediment and lower  $\tau_c^*$  (Recking, 2012; Bunte  
144 et al., 2013). The idea that transport rate influences  $\tau_c^*$  is an intriguing feedback and the focus  
145 of the present analysis because, by definition,  $\tau_c^*$  influences transport rate (Eq. 1).  
146 Mechanistically, mobile grains impacting stationary grains have been shown to dislodge and  
147 entrain grains into the flow (Ancey et al., 2008). Empirically, Bunte et al. (2013) interpreted  
148 that lower  $\tau_c^*$  corresponded to looser beds caused by higher rates of sediment supply from  
149 upstream, and noted that the stability of bed particles can be qualitatively assessed in the field  
150 while doing pebble counts. Yager et al. (2012b) demonstrated that in-channel sediment  
151 availability varied inversely with the degree of boulder protrusion, indicating preferential  
152 filling of topographic lows by mobile sediment.

153 Recking (2012) compared bed load monitoring records from steep natural channels  
154 (>5% slope) to differences in sediment supply interpreted from aerial photographs of  
155 surrounding hillslopes. Channels with higher supply rates had higher transport rates for a  
156 given shear stress, consistent with a dependence of transport thresholds on supply. While  
157 stating that deriving a threshold model “taking into account the sediment input as a parameter  
158 would be difficult“, Recking (2012) proposed quantitative bounds on reference stress for the  
159 end-member cases of very high sediment supply ( $\tau_{mss}^*$ ) and very low sediment supply ( $\tau_m^*$ ) in  
160 steep mountain channels:

$$161 \quad \tau_{mss}^* = (5S + 0.06) \left( \frac{D_{84}}{D_{50}} \right)^{-1.5} \quad (5)$$

$$162 \quad \tau_m^* = (5S + 0.06) \left( \frac{D_{84}}{D_{50}} \right)^{4.4\sqrt{S}-1.5} \quad (6)$$

163 It should be noted that these reference stress equations describe transport of the  $D_{84}$  grain size  
164 (rather than say  $D_{50}$ ), using a  $D_{84}$ -based bedload transport model (Recking, 2012).  
165 Importantly, the ratio  $D_{84}/D_{50}$  is included in Eq. 5 and 6 to represent surface armoring, which  
166 tends to vary with sediment supply (Dietrich et al., 1989), thus relating bed state controls to

167 supply-dependent bounds. Overall, this review of previous work suggests that numerous  
168 interrelated variables influence  $\tau_c^*$ , but also that many controls on  $\tau_c^*$  may share similar  
169 sensitivities to changing bed roughness and sediment supply.

## 170 **1.2 Morphodynamics and hypotheses**

171 Feedback between channel morphology and bedload transport defines mountain river  
172 morphodynamics. The Exner equation of sediment mass conservation quantifies how  
173 transport changes correspond to topographic changes (Paola and Voller, 2005):

$$174 \quad \frac{\partial z}{\partial t} = - \left( \frac{1}{1 - \lambda_p} \right) \frac{\partial q_s}{\partial x} \quad (7)$$

175 where  $z$  is bed elevation (vertical position),  $x$  is horizontal position,  $t$  is time, and  $\lambda_p$  is bed  
176 porosity. In this morphodynamic equation (presented for simplicity without an uplift or  
177 subsidence term), topographic equilibrium ( $\partial z / \partial t = 0$ ) is attained when the sediment flux into  
178 a reach equals the sediment flux out ( $\partial q_s / \partial x = 0$ ). Channel morphology has long been  
179 recognized to influence sediment transport. Of particular relevance to the present work, Stark  
180 and Stark (2001) proposed a landscape evolution model with a variable called *channelization*  
181 that is defined as representing “the ease with which sediment can flux through a channel  
182 reach”. Conceptually, channelization characterizes how changes in reach morphology  
183 influence local transport rate. However, channelization is an abstract unitless number that  
184 does not correspond physically to any measurable aspects of morphology. A fundamental  
185 feedback is imposed in the Stark and Stark (2001) model: channelization evolves through  
186 time as a function of both sediment flux and of itself, resulting in a differential equation. The  
187 combination of local slope and channelization tend to asymptote towards values such that  
188  $\partial q_s / \partial x = 0$ , i.e. transport equilibrium. For a given upstream sediment supply rate, a modeled  
189 reach can evolve to equilibrium at different slopes (for different corresponding values of  
190 channelization) because both slope and channelization affect transport rate. Interestingly, the  
191 above definition of channelization could also be applied to  $\tau_c^*$ . Because of its control on  
192 transport rates, changes in  $\tau_c^*$  should influence channel morphodynamics, both over human  
193 timescales (e.g., in response to natural and anthropogenic perturbations such as landslides,

194 floods, post-wildfire erosion, land use, changing climate) and longer timescales (landscape  
195 evolution).

196 The overall goal of the present work is to understand and model possible feedbacks  
197 among thresholds of motion, changes in transport rate, and the morphological evolution of  
198 channels. First, I hypothesize that variability in gravel  $\tau_c^*$  is physically meaningful, and that  
199 the implicit effects of multiple processes on  $\tau_c^*$  can collectively be accounted for in terms of  
200 sediment flux dependence. Second, because changes in alluvial channel morphology are  
201 strongly coupled with sediment flux (Eq. 7), I hypothesize that the evolution of  $\tau_c^*$  can  
202 implicitly model effects of evolving channel morphology.

203 The paper is organized as follows. First, I propose a conceptual model for how  $\tau_c^*$   
204 should evolve through time as a function of sediment flux (section 2.1), and then translate this  
205 model into equations (section 2.2). Next, I describe flume experiments on disequilibrium  
206 gravel transport (section 2.3), and use these experiments to empirically calibrate  $\tau_c^*$  model  
207 parameters (sections 3.1, 3.2). After that, effects of  $\tau_c^*$  evolution on river channel  
208 morphodynamics are explored using a simple model for river channel longitudinal profile  
209 development (section 3.3). Finally, I argue that  $\tau_c^*$  is one of many morphodynamic “state  
210 variables” that describe how river channels evolve in response to external forcing and internal  
211 feedbacks, analagous to state variables in thermodynamics (section 4.2).

## 212 **2 Models and Methods**

### 213 **2.1 Conceptual framework for $\tau_c^*$ evolution**

214 The  $\tau_c^*$  model proposed below is designed to be applicable at the reach scale, over  
215 timescales ranging from changing discharge during floods to the morphodynamic evolution of  
216 channels and surrounding landscapes. By definition, models are useful representations of  
217 reality because many complexities are omitted. Although recent work demonstrates a richness  
218 of threshold and transport behavior caused by turbulent velocity fluctuations and the statistical  
219 mechanics of particle populations over short timescales (e.g., Schmeeckle and Nelson, 2003;  
220 Diplas et al., 2008; Furbish et al., 2012), these dynamics are not explicitly considered or  
221 parameterized in my deterministic model formulation.



222 Section 1.1 shows that a great many variables and processes influence  $\tau_c^*$ . While  
223 separate models for every isolated control on  $\tau_c^*$  would be informative, it would also be  
224 difficult to combine myriad process-specific models and still meaningfully predict the  
225 temporal evolution of  $\tau_c^*$  for the morphodynamic evolution of channels. Rather than being a  
226 process “splitter“, I approach the problem as a process “lumper“: I hypothesize that many  
227 factors affecting grain mobility share common underlying dependencies on net entrainment  
228 and net deposition.

229 Consistent with the form of most bedload transport equations (e.g. Eq. 1),  $\tau_c^*$  is  
230 defined as a particular Shields stress at which only the most mobile grains of that size become  
231 entrained. However, for a population of grains of a given size on the bed surface, there should  
232 actually be a distribution of  $\tau_c^*$ —notated here as a set of values  $\{\tau_c^*\}$ --because each individual  
233 grain has a particular pocket geometry and near-bed flow velocity at its unique location, and  
234 hence a somewhat different individual threshold. Gravel flux increases with discharge  
235 primarily because thresholds are gradually exceeded for increasing proportions of surface  
236 grains of a given size. For a given transport equation (e.g. Eq. 1), a particular  $\tau_c^*$  value from  
237 the lower tail of distribution  $\{\tau_c^*\}$  should best predict sediment flux. Conceptually, an  
238 underlying assumption is that net entrainment or net deposition changes the underlying  $\{\tau_c^*\}$   
239 distribution, and therefore changes the value of  $\tau_c^*$  that best predicts transport rates.

240 In the case of a channel reach undergoing net erosion ( $q_{sout} > q_{sin}$ ), the most mobile  
241 individual grains—i.e. the lowest  $\tau_c^*$  values in the  $\{\tau_c^*\}$  distribution--would preferentially be  
242 entrained first, while the grains remaining on the bed would tend to have higher thresholds.  
243 Therefore, I hypothesize that progressive erosion tends to entrain grains from increasingly  
244 more stable positions on the bed, gradually increasing  $\tau_c^*$ . Conversely, during net deposition  
245 ( $q_{sout} < q_{sin}$ ), I assume that grains tend to preferentially deposit in more stable bed positions  
246 such as local topographic lows. Continued deposition would lead to grains being deposited in  
247 progressively less stable positions, gradually decreasing  $\tau_c^*$ . These hypothesized  $\tau_c^*$  changes  
248 represent averages for the population of grains; individual grains would exhibit great  
249 variability. For example, during net deposition individual grains would also both deposit and

250 be entrained from more and less stable positions, but grains would have a greater probability  
251 of remaining deposited in the more stable positions.

252 Mechanistically,  $\tau_c^*$  evolution would also be driven by changes in bed topography and  
253 roughness, grain clustering and stabilizing structures, compaction of the bed and interlocking  
254 of grains, etc. None of these physical variables are explicitly included in the model equations;  
255 instead their combined effects are assumed to vary with net erosion or deposition.  
256 Importantly, the amount by which  $\tau_c^*$  changes should also depend on the current state of the  
257 bed surface. For example, starting from a relatively rough and interlocked bed surface, net  
258 deposition would initially cause relatively substantial decreases in bed roughness as local  
259 lows preferentially filled with loose grains, and relatively large corresponding decreases in  
260  $\tau_c^*$ . However, for a given surface GSD there must be physical limits for bed roughness and  
261 grain packing. If bed surface grains are already relatively loose and mobile, additional  
262 deposition would cause less of a decrease in  $\tau_c^*$ , or no decrease at all if the bed is already as  
263 unstable for a given surface GSD as it can be. Thus, the change in  $\tau_c^*$  should also be a  
264 function of  $\tau_c^*$ . The combination of processes that cause changes in  $\tau_c^*$  also place physical  
265 limits on how high, and low,  $\tau_c^*$  can evolve.

266 These  $\tau_c^*$  dependencies describe negative transport feedbacks: net erosion  
267 progressively reduces rates of erosion by making grains harder to entrain, while net deposition  
268 progressively makes grains more mobile. Through these and other morphological feedbacks,  
269 it has long been recognized that channel reaches evolve towards steady-state configurations in  
270 which the sediment flux into a reach balances the flux exiting, leading to zero net erosion or  
271 deposition (Mackin, 1948). At this statistical steady state,  $\tau_c^*$  should also be at equilibrium,  
272 and in fact is a key part of reaching channel reach equilibrium. If  $\tau_c^*$  were still systematically  
273 evolving (e.g. from continued bed state changes), then transport rate through the reach would  
274 also change, perturbing the channel away from its statistical equilibrium.

## 275 2.2 $\tau_{c(q_s)}^*$ model equations

276 While the above discussion makes the case that  $\tau_c^*$  inevitably evolves through time  
277 due to a variety of interrelated factors, the new model proposed here is specifically in terms of

278 sediment flux. I use the notation  $\tau_{c(q_s)}^*$  to distinguish this specific model from more general  
 279 representations of thresholds of motion in other models and analyses. Because longitudinal  
 280 coordinate  $x$  increases downstream, net erosion in a reach is indicated by  $\partial q_s / \partial x > 0$  and net  
 281 deposition by  $\partial q_s / \partial x < 0$ . The following relations are proposed:

$$282 \quad \frac{\partial \tau_{c(q_s)}^*}{\partial t} = \begin{cases} kB \left( \left| \frac{\partial q_s}{\partial x} \right| \right)^{\kappa_{ent}} & \text{if } \partial q_s / \partial x > 0 \\ -k(1-B) \left( \left| \frac{\partial q_s}{\partial x} \right| \right)^{\kappa_{dep}} & \text{if } \partial q_s / \partial x < 0 \end{cases} \quad (8)$$

$$283 \quad B = \frac{\tau_{c \max}^* - \tau_{c(q_s)}^*}{\tau_{c \max}^* - \tau_{c \min}^*} \quad (9)$$

284 where  $\kappa_{ent}$  and  $\kappa_{dep}$  are dimensionless exponents corresponding to entrainment and  
 285 deposition, respectively, and  $k$  is a scaling factor. These three parameters will be empirically  
 286 fit to experiments.  $\tau_{c \min}^*$  and  $\tau_{c \max}^*$  represent bounds on how low or high  $\tau_{c(q_s)}^*$  can plausibly  
 287 evolve (assumed to be 0.02 and 0.35 respectively). Eq. (8) predicts that  $\tau_{c(q_s)}^*$  incrementally  
 288 decreases with net deposition, and incrementally increases during net erosion. “Feedback  
 289 factor”  $B$  has a value between 0 and 1 and makes Eq. (8) a differential equation. It scales the  
 290 incremental change in  $\tau_{c(q_s)}^*$  so that deposition on an already “loose” bed ( $\tau_{c(q_s)}^*$  close to  
 291  $\tau_{c \min}^*$ ) minimally decreases  $\tau_{c(q_s)}^*$ , but erosion causes a larger  $\tau_{c(q_s)}^*$  increase. Conversely, if  
 292  $\tau_{c(q_s)}^*$  is already high (close to  $\tau_{c \max}^*$ ), then erosion causes a much smaller  $\tau_{c(q_s)}^*$  change than  
 293 deposition. Finally, I note that representing  $\partial \tau_{c(q_s)}^* / \partial t$  as a function of  $\partial q_s / \partial x$  (Eq. 8) is  
 294 broadly analogous in form to Exner (Eq. 7).

295 A limitation of Eq. (8) is that, for dimensional consistency, the units of  $k$  vary with  
 296  $\kappa_{ent}$  and  $\kappa_{dep}$ . An improved equation replaces spatial changes in flux with spatial changes in  
 297 the thickness of deposited or eroded sediment:

$$298 \quad \frac{\partial \tau_{c(q_s)}^*}{\partial t} = \begin{cases} kA_r B \left( \left| \frac{\partial \theta_s}{\partial x} \right| \right)^{\kappa_{ent}} & \text{if } \partial q_s / \partial x > 0 \\ -kA_r (1-B) \left( \left| \frac{\partial \theta_s}{\partial x} \right| \right)^{\kappa_{dep}} & \text{if } \partial q_s / \partial x < 0 \end{cases} \quad (10)$$

299  $\theta_s$  is the thickness of sediment deposited or eroded at a given location.  $\partial\theta_s/\partial x$  is a  
 300 dimensionless ratio representing spatial changes in erosion and deposition. In this case,  $k$  has  
 301 dimensions  $1/t$  and scales how quickly  $\tau_{c(q_s)}^*$  evolves.  $\theta_s$  can be calculated by integrating Eq.  
 302 (7) over time interval  $t_1$  to  $t_2$ :

$$303 \quad \theta_s(t_2, x) = z(t_2, x) - z(t_1, x) = \frac{1}{1 - \lambda_p} \int_{t_1}^{t_2} \frac{\partial q_s(t, x)}{\partial x} dt \quad (11)$$

304 (recall that  $\int_a^b (\partial f(s, t)/\partial t) dt = f(s, b) - f(s, a)$  for a generic function  $f$ ). Using discrete flume  
 305 data,  $\theta_s$  is calculated over a measurement interval  $\Delta t$  as  $(1 - \lambda_p)^{-1} (\overline{q_{sout}} - \overline{q_{sin}}) \Delta t / \Delta x$ , where  
 306  $\Delta x$  is the length of the flume and the sediment flux terms are averaged over  $\Delta t$ .

307  $A_r$  is a dimensionless armoring parameter, calculated in several ways in order to  
 308 explore whether predictions can be improved by explicitly including bed surface grain size or  
 309 bed roughness characteristics. Setting  $A_r = D_{50}/D_{84}$  (the reciprocal of the Recking (2012)  
 310 armoring constraint in Eq. 5 and 6) means that incremental changes to  $\tau_{c(q_s)}^*$  are larger where  
 311  $D_{50}$  is relatively closer to  $D_{84}$ . Setting  $A_r = 2D_{50}/(D_{84} - D_{16})$  suggests that  $\tau_{c(q_s)}^*$  changes  
 312 should be larger when intermediate diameters are large relative to a measure of the  
 313 normalized width of the bed surface GSD. I also try  $A_r = D_{50}/\sigma$ , where  $\sigma$  is bed surface  
 314 roughness.  $A_r = D_{50}/\sigma$  suggests that, relative to topographic lows and highs, large grains  
 315 cause bigger  $\tau_{c(q_s)}^*$  changes than small grains. Finally,  $A_r$  is simply set to 1 in some  
 316 calculations below.

### 317 2.3 Experimental design

318 The flume experiments used to calibrate  $k$ ,  $\kappa_{ent}$  and  $\kappa_{dep}$  were designed to explore  
 319 feedback during disequilibrium transport in gravel-bed rivers. Fig. 2 shows how transport  
 320 rates, surface  $D_{50}$  and bed slope evolved in response to fine gravel pulses. Johnson et al.  
 321 (2015) provide details of the experimental conditions and how they scale to natural conditions  
 322 most consistent with step-pool development, and so the summary here is brief. Four  
 323 experiments were conducted in a small flume 4 m long and 10 cm wide. Experiments 1 and 4  
 324 were done at 8% initial slope, and 2 and 3 at 12% initial slope; slopes subsequently evolved

325 fairly little during morphological adjustment (Fig. 2c). Water discharge was held constant  
326 throughout to better isolate the influence of sediment supply changes on transport. Sediment  
327 transported out of the flume was caught in a downstream basket, sieved and weighed. Overall  
328 sediment diameters ranged from 0.45 to 40 mm; these sizes were sorted and painted different  
329 colors based on five size classes with  $D_{50} = 2.4, 4.5, 8.0, 15.4,$  and  $27.2$  mm ( $D_{16} = 2.0, 3.4,$   
330  $6.7, 12.4,$  and  $24.0$  mm;  $D_{84} = 2.8, 5.7, 10.3, 19.7,$  and  $31.3$  mm, respectively). Surface GSDs  
331 were measured using image analysis of colored bed surface grains during the experiments.  
332 Bed topography was measured using a triangulating laser, and bed roughness ( $\sigma$ ) was  
333 calculated from longitudinal topographic swaths as the standard deviation of detrended bed  
334 elevations. Water surface elevations were measured using an ultrasonic distance sensor, and  
335 water depths were calculated by subtracting bed elevations. Total shear stress ( $\tau$ ) was  
336 calculated assuming steady uniform flow when spatially averaged over the flume:

$$337 \quad \tau = \rho g h S \quad (12)$$

338 where  $h$  is water depth corrected for sidewall effects following the method of Wong and  
339 Parker (2006), and  $S$  is water surface slope.

340 The experiments started with mixed-size sediment screeded flat. Initially, all surface  
341 sizes were observed to be mobile (and therefore above thresholds of motion). At the  
342 beginning no sediment was fed into the upstream end ( $q_{sfeed} = 0$ ), and the bed responded by  
343 coarsening, roughening and gradually stabilizing as transport rates dropped by  $\approx 3$  orders of  
344 magnitude (Fig. 2a). After this initial stabilization, a step-function pulse of the finest gravel  
345 size ( $D_{50}=2.4$  mm) was fed into the flume at  $q_{sfeed}=1000$  g/min, representing an idealization  
346 of a landslide, debris flow, post-wildfire erosion, or anthropogenic gravel augmentation that  
347 would suddenly supply sediment finer than the existing bed surface. The feed rate was chosen  
348 to be similar to the high initial transport rates (Fig. 2a), while not so high as to inhibit  
349 morphodynamic feedback by fully burying the existing bed surface. Initially some deposition  
350 occurred on the bed, but the channel adjusted rapidly, by both entraining coarser bed surface  
351 grains and transporting most of the finer supplied gravel, so that the outlet transport rate  
352 ( $q_{sout}$ ) approximately matched  $q_{sin}$ . After that the sediment supply pulse  $q_{sin}$  was again  
353 dropped to zero, and the bed gradually restabilized. Johnson et al. (2015) explained in detail  
354 how bed roughness evolved, and how the addition of finer gravels ultimately caused surface

355 coarsening (Fig. 2b). Unbalanced transport rates into and out of the flume demonstrate  
 356 disequilibrium conditions (Fig. 2a), although transport evolved towards equilibrium.

#### 357 2.4 The Wilcock and Crowe (2003) transport model

358 To quantify thresholds of motion from these experimental data (Fig. 2) requires a  
 359 transport model. The Wilcock and Crowe (2003) “Surface-based Transport Model for Mixed-  
 360 Size Sediment”, abbreviated as W&CM, is used for two main reasons. First, the model can, at  
 361 least in principle, account for the effects of changing surface GSD on  $\tau_c^*$ . Second, the model  
 362 should also be able to account for possible effects of sand and fine gravel abundance on  
 363 thresholds of motion (Eq. 4). By using the W&CM to isolate and remove GSD effects,  
 364 experimentally-constrained thresholds of motion can then be used to evaluate the proposed  
 365  $\tau_{c(q_s)}^*$  functions (Eq. 8-11). A secondary goal is to evaluate how well the W&CM predicts  
 366 disequilibrium transport at steeper slopes and lower water depths than Wilcock and Crowe  
 367 (2003) used in their own steady-state experiments.

368 A key variable in the W&CM is  $\tau_{rs50}^*$ , the nondimensional reference stress for the  
 369 median surface grain size ( $D_{s50}$ ).  $\tau_{rs50}^*$  corresponds to a very low transport rate of  $W_i^*=0.002$ .  
 370  $W_i^*$  is a nondimensional bedload transport rate for grain size class  $i$ ,

$$371 \quad W_i^* = \left( \frac{\rho_s}{\rho} - 1 \right) \frac{g q_{bi}}{F_i u_\tau^3} \quad (13)$$

372 where  $q_{bi}$  is the volumetric transport rate per unit channel width of grains of size  $i$ ,  $F_i$  is the  
 373 fraction of size  $i$  on the bed surface, and  $u_\tau$  is shear velocity ( $u_\tau = \sqrt{\tau/\rho}$ ). Wilcock and  
 374 Crowe (2003) presented an empirical relationship between transport and shear stress:

$$375 \quad W_i^* = \begin{cases} 0.002 \left( \frac{\tau}{\tau_{ri}} \right)^{7.5} & \text{for } \tau/\tau_{ri} < 1.35 \\ 14 \left( 1 - \frac{0.894}{\left( \frac{\tau}{\tau_{ri}} \right)^{0.5}} \right)^{4.5} & \text{for } \tau/\tau_{ri} \geq 1.35 \end{cases} \quad (14)$$

376 where  $\tau_{ri}$  is a dimensional reference stress for size class  $i$ , with dimensionless equivalent  $\tau_{ri}^*$   
 377 (Eq. 3). A “hiding function” determines how nondimensional reference stresses vary with  
 378 grain size:

$$379 \quad \frac{\tau_{ri}^*}{\tau_{rs50}^*} = \left( \frac{D_i}{D_{s50}} \right)^{b-1} \quad (15)$$

380 The hiding function exponent  $b$  is calculated as

$$381 \quad b = \frac{0.67}{1 + e^{(1.5 - D_i/D_{s50})}} \quad (16)$$

382 Note that Eq. (16) is slightly modified from the exact Wilcock and Crowe (2003) version by  
 383 replacing  $D_{sm}$  (the geometric mean surface diameter) with  $D_{s50}$ , to more simply use just one  
 384 measure of the central tendency of the surface GSD.

### 385 **3 Results**

386 In this section, the W&CM is used to calculate best-fit thresholds of motion. Next, the  
 387  $\tau_{c(q_s)}^*$  model is shown to predict the experimentally-constrained  $\tau_{rs50}^*$  trends after calibrating  
 388 several parameters. Finally, the influence of  $\tau_{c(q_s)}^*$  on morphodynamics is explored using a  
 389 simple model for gravel-bed river profile evolution.

#### 390 **3.1 Best-fit $\tau_{rs50}^*$ and hiding functions**

391 The experimental data are used to determine  $W_i^*$  (Eq. 13) and  $\tau_{ri}^*$  for each of the five  
 392 grain size classes (Eq. 14). Best-fit  $\tau_{rs50}^*$  is then calculated in two ways. In the first approach,  
 393  $b$  is calculated using Eq. (16), and  $\tau_{rs50}^*$  and 95% confidence intervals are estimated using  
 394 nonlinear multiple regression in Matlab (Fig. 3, “W&CM fit”). Importantly, the temporal  
 395 evolution of best-fit  $\tau_{rs50}^*$  is not explained by grain size changes, because the W&CM already  
 396 accounts for the effects of surface GSD (Fig. 3).

397 While  $b$  varies with relative grain size in the W&CM (Eq. 16), other proposed hiding  
 398 functions have found (or assumed) that a single  $b$  value applies to different grain sizes, at least  
 399 for a given set of flow and surface conditions (Parker, 1990; Buscombe and Conley, 2012).  
 400 My second approach for estimating  $\tau_{rs50}^*$  explores whether the results are sensitive to the

401 particular form of Eq. (16). Rather than Eq. (16), nonlinear multiple regression was used to  
402 estimate both  $b$  and  $\tau_{rs50}^*$  in Eq. (15), with separate regressions for each time step (Fig. 3). The  
403 temporal evolution of experimental  $\tau_{rs50}^*$  is generally comparable for the two different  
404 approaches (Fig. 3).

405 Interestingly, Fig. 4 shows that the hiding function exponents determined using the  
406 nonlinear multiple regressions for  $b$  and  $\tau_{rs50}^*$  are consistent with Eq. (16) of Wilcock and  
407 Crowe (2003). In spite of substantial scatter there is a slope break which corresponds to a  
408 change in  $b$  for surface grains smaller and larger than the median, suggesting that the W&CM  
409 reasonably can describe hiding and exposure relations among grains in steeper channels and  
410 for shallower flow depths than used in the Wilcock and Crowe (2003) experiments.

### 411 3.2 Calibration of $\tau_{c(q_s)}^*$ model parameters

412 Fig. 5 compares experimentally-constrained thresholds of motion to several predictions  
413 of these trends. First, I test whether surface sand fraction (Eq. 4) can explain the evolution of  
414  $\tau_{rs50}^*$  (Curran and Wilcock, 2005; Wilcock and Crowe, 2003). As described in section 1.1, the  
415 effect of finer grains on thresholds of motion of coarser grains is not limited to sand sizes  
416 alone (Venditti et al., 2010; Sklar et al., 2009; Johnson et al., 2015). In the Johnson et al.  
417 (2015) experiments, the finest grain size class has  $D_{50}=2.4$  mm,  $D_{16}=2.0$  mm,  $D_{84}=2.8$  mm.  
418 Setting  $F_s$  equal to the surface fraction of this size class, a nonlinear multiple regression of Eq.  
419 (4) to all four experiments together yielded a poor although statistically significant fit to the  
420 data ( $R^2=0.13$ ;  $p=3 \times 10^{-5}$ ;  $c_1=0.097 \pm 0.04$ ,  $c_2=0.103 \pm 0.11$ , and  $c_3=5.6 \pm 11$ ), confirming that  
421 surface grain size changes alone cannot explain observed  $\tau_{rs50}^*$  patterns (Fig. 5, “Sand  
422 fraction”). Note that I have assumed for simplicity that  $\tau_{rs50}^* = \tau_{rm}^*$ , i.e. substituting the surface  
423  $D_{50}$  for the geometric mean surface diameter in Eq. (4).

424 Various  $\tau_{c(q_s)}^*$  models provide better fits to experimentally-constrained  $\tau_{rs50}^*$  (Fig. 5;  
425 Eq. 10). Models with  $A_r=1$  are shown using a single set of model parameters for all four  
426 experiments (“collective best fit”,  $k=0.17$ ,  $\kappa_{dep}=0.20$ ,  $\kappa_{ent}=0.40$ ), and also the best fit for each  
427 experiment separately. The best-fit overall model has  $R^2=0.69$ , suggesting statistically that  
428 effects of supply and transport disequilibrium can explain over 2/3 of the variability in  $\tau_{rs50}^*$



429 (Table 1). Note that  $\tau_{c(q_s)}^*$  and  $\tau_{rs50}^*$  are assumed to be interchangeable. Because Eq. (8) and  
 430 (10) are differential equations, best-fit parameters could not be calculated using nonlinear  
 431 multiple regressions. Instead, I use a brute-force approach of incrementally stepping through a  
 432 wide range of  $k$ ,  $\kappa_{dep}$  and  $\kappa_{ent}$ , and finding the combination of parameters that give the  
 433 smallest root-mean-square deviation (RMSD). These calculations started at  $\tau_{rs50}^*=0.036$  at  
 434  $t=0$ , which is consistent with the experiments, and also is the  $\tau_{rs50}^*$  proposed by Wilcock and  
 435 Crowe (2003) in the absence of sand dependence.

436 Interestingly, model fits using  $A_r = D_{50}/\sigma$  are not substantially different from  $A_r=1$ ,  
 437 and  $R^2=0.69$  is the same (Fig. 5). Table 1 includes additional regressions for  $A_r = D_{50}/D_{84}$   
 438 and  $A_r = 2D_{50}/(D_{84} - D_{16})$ . These fits overlap almost perfectly with those shown on Fig. 5.  
 439 As explained in section 1.1,  $A_r$  should account for surface GSD and bed topography  
 440 influences on thresholds. The fact that regressions are not improved by including these  
 441 variables may suggest that transport disequilibrium is a more important control on threshold  
 442 evolution over a broad range of surface GSD and bed roughness. Parameters estimated for  
 443 dimensional  $\partial q_s/\partial x$  (Eq. 8) indicate that the dimensionally balanced model performs equally  
 444 well (Table 1). Because these variants do not substantially improve  $\tau_{c(q_s)}^*$  model fits, we use  
 445 the simplest dimensionally consistent model (Eq. 10 with  $A_r=1$ ) in the analysis below.

### 446 3.3 Influence of $\tau_{c(q_s)}^*$ on morphodynamics

447 Next, an idealized morphodynamic model demonstrates how the proposed  $\tau_{c(q_s)}^*$   
 448 relations influence the evolution of channel profiles, focusing on reach slopes and timescales  
 449 of adjustment. Because the modeling goal is to isolate and understand effects of evolving  
 450  $\tau_{c(q_s)}^*$ , the underlying model is arguably the simplest reasonable representation of  
 451 morphodynamic feedback. Inspired by Parker (2005), the model describes a channel reach in  
 452 which slope evolves through aggradation and degradation. The downstream boundary  
 453 elevation is fixed (constant base level). Sediment transport and bed elevation are modeled  
 454 using Eq. (1) (substituting  $\tau_{c(q_s)}^*$  for  $\tau_c^*$  as needed) and Eq. (7) with a single grain diameter  
 455 ( $D$ ). Unit water discharge  $q_w$  is similarly held constant for simplicity. Upstream sediment  
 456 supply rate ( $q_{sfeed}$ ) is imposed, and is varied to drive channels to new steady states.

457 Relationships among flow depth, depth-averaged velocity and discharge are imposed by  
 458 assuming that hydraulic roughness remains constant, parameterized through a Darcy-Weisbach  
 459 hydraulic friction coefficient:

$$460 \quad f = \frac{8gq_w S}{U^3} \quad (17)$$

461 For a given discharge this allows both  $U$  and  $h$  to be determined:

$$462 \quad U = \frac{q_w}{h} \quad (18)$$

$$463 \quad h = q_w^{2/3} \left( \frac{f}{8gS} \right)^{1/3} \quad (19)$$

464 Two model variations are compared: in the “Exner-only” morphodynamic model,  $\tau_c^*$   
 465 is a constant. In the “Exner+ $\tau_{c(q_s)}^*$ ” variant,  $\tau_{c(q_s)}^*$  evolves through time following Eq. (10). At  
 466 equilibrium, channel slope can be predicted for both model variants (and substituting  $\tau_{c(q_s)}^*$   
 467 for  $\tau_c^*$  where appropriate) by combining Eq. (1), (2), (12) and (19):

$$468 \quad S_{eq} = \frac{2.83}{q_w} \left( \frac{g}{f} \right)^{1/2} D^{3/2} \left( \frac{\rho_s}{\rho} - 1 \right)^{3/2} \left[ \left( \frac{q_s^*}{3.97} \right)^{2/3} + \tau_c^* \right]^{3/2} \quad (20)$$

469 For a given discharge, Eq. (20) indicates that both sediment supply and the threshold of  
 470 motion influence steady-state morphology (slope).

471 Away from equilibrium, rates of change of bed elevation along a river profile should  
 472 depend not only on the sediment flux at a given channel cross section, but also on the average  
 473 velocity at which grains move downstream. This control has occasionally been ignored in  
 474 previous models of profile evolution. In my model, it is crudely incorporated by assuming that  
 475 average bedload velocity is a consistent fraction of water velocity, broadly consistent with  
 476 previous findings that bedload velocities are proportional to shear velocity (e.g., Martin et al.,  
 477 2012). The modeling timestep is set to be equal to the time it takes sediment to move from  
 478 one model node (bed location) to the next, and is adjusted during simulations. While this  
 479 approach makes the temporal evolution of channel changes internally consistent within the  
 480 model, timescales for model response will still be much shorter than actual adjustment times  
 481 in field settings because flood intermittency is not included (so the model as implemented is

482 always at a constant flood discharge). In addition, the upstream sediment supply is imposed in  
483 the model, while in natural settings hillslope-floodplain-channel coupling could greatly affect  
484  $q_{sfeed}$  over time if significant aggradation or downcutting took place.

485 Table 2 provides parameters used for morphodynamic modeling. Although the highly  
486 simplified model is not intended for quantitative field comparisons, variables  $D$  ( $D_{50}=50$  mm),  
487  $f(0.1)$ , and  $q_w$  ( $1 \text{ m}^2/\text{s}$ ) were chosen to be broadly consistent with a moderate ( $\approx 2\text{-}3$  year peak  
488 discharge recurrence interval) bedload-transporting flood in Reynolds Creek, Idaho (Olinde  
489 and Johnson, 2015). Reynolds creek is a snowmelt-dominated channel with reach slopes that  
490 vary widely from  $\sim 0.005$  to  $0.07$ . In an instrumented reach with a slope of  $0.02$ , Olinde (2015)  
491 used RFID-tagged tracers and channel-spanning RFID antennas to measure  $\tau_{rs50}^* \approx 0.06$ . A  
492 constant  $\tau_c^*=0.06$  is used for the Exner-only models, while  $\tau_{c(q_s)}^*=0.06$  is used as the initial  
493 condition for Exner+ $\tau_{c(q_s)}^*$  models. Field constraints on upstream sediment feed rates were not  
494 available, and so  $q_{sfeed}$  values were chosen to provide reasonable model slopes. Exponents  
495  $\kappa_{dep}$  and  $\kappa_{ent}$  used the experimental calibrations, while  $k$  were chosen so that changes in  $\tau_c^*$   
496 occurred over the same range of timescales as topographic adjustments, to better illustrate the  
497 interplay of variables in morphodynamic evolution (Table 2).

### 498 3.3.1 Morphodynamic model results

499 Fig. 6 and 7 compare how longitudinal profiles respond to an increase in sediment  
500 supply, for both the Exner-only (constant  $\tau_c^*$ ) and Exner+ $\tau_{c(q_s)}^*$  models. The initial condition  
501 is a channel at equilibrium ( $q_{sout}=q_{sfeed}$ ). At  $t=0$ , sediment supply is increased by a factor 5.  
502 The Exner+ $\tau_{c(q_s)}^*$  model aggrades to a new equilibrium slope that is lower than the Exner-only  
503 model. This occurs because deposition ( $\partial q_s/\partial x < 0$ ) causes  $\tau_{c(q_s)}^*$  to decrease over time,  
504 progressively increasing transport efficiency (i.e., higher transport rates at a lower slope)  
505 compared to constant  $\tau_c^*=0.06$  (Fig. 7). Feedback causes the reverse effect for a decrease in  
506  $q_{sfeed}$ :  $\tau_{c(q_s)}^*$  progressively increases as slope decreases, leading to channel re-equilibration  
507 both sooner and at a higher slope (Fig. 7).

508 An equilibrium timescale ( $t_{eq}$ ) is measured here as the amount of time it takes from a  
509 supply perturbation ( $t=0$  in these models) to the slope adjusting to be within  $0.0001$  of its  
510 equilibrium slope (Eq. 20). In Fig. 7,  $t_{eq}$  are substantially longer for the Exner-only models

511 than for the Exner+ $\tau_{c(q_s)}^*$  models. For Exner+ $\tau_{c(q_s)}^*$ , an increase in  $q_{sfeed}$  leads to aggradation,  
512 in turn increasing local  $q_s^*$  by both increasing slope and also decreasing  $\tau_{c(q_s)}^*$  (Eq. 1, 10).  
513 Both factors adjusting enable equilibrium to be reached sooner.

514 Over a  $q_{sfeed}$  range of two orders of magnitude, equilibrium slopes change less for the  
515 Exner+ $\tau_{c(q_s)}^*$  model than for Exner-only (Fig. 8a). The ratio of these equilibrium slopes  
516 illustrates the magnitude of the change, where “ $S_{eq}$  ratio” is  $S_{eq}$  for Exner+ $\tau_{c(q_s)}^*$  divided by  
517 Exner-only  $S_{eq}$  (Fig. 8b). An order-of-magnitude decrease in  $q_{sfeed}$  caused Exner+ $\tau_{c(q_s)}^*$   $S_{eq}$  to  
518 be roughly 24% - 36% larger than Exner-only  $S_{eq}$ . An order-of-magnitude increase in  $q_{sfeed}$   
519 caused Exner+ $\tau_{c(q_s)}^*$  to be roughly 20% smaller than the constant- $\tau_c^*$  model. Calculations are  
520 also shown for several values of scaling factor  $k$ . A larger  $k$  means that  $\tau_{c(q_s)}^*$  increases or  
521 decreases more rapidly for a given amount of aggradation or degradation (Eq. 10), which in  
522 general enables a new equilibrium to be reached with a smaller change in slope.

523 Equilibrium timescales are quite sensitive to  $k$  as well as to sediment supply rate (Fig  
524 8c). Similar to the  $S_{eq}$  ratio, the “ $t_{eq}$  ratio” is  $t_{eq}$  for Exner+ $\tau_{c(q_s)}^*$ , divided by  $t_{eq}$  for the Exner-  
525 only model (Fig. 8d). There is an asymmetry in equilibrium times for aggradation vs.  
526 degradation; in general the difference between Exner-only and Exner+ $\tau_{c(q_s)}^*$  is somewhat  
527 smaller during bed aggradation, and the difference decreases with increasing  $q_{sfeed}$ .  
528 Interestingly, the highest  $k$  (2.8E-5) results in a threshold-like response where the  $t_{eq}$  ratio  
529 rapidly increases from roughly 0.01 to 0.8 (Fig. 8d). This change occurred because  $\tau_{c(q_s)}^*$   
530 “bottomed out”, i.e. reached its minimum possible value ( $\tau_{c(q_s)}^* \approx \tau_{cmin}^* = 0.02$ ) before the  
531 equilibrium slope had been reached (Fig. 8e). At that point,  $\tau_{c(q_s)}^*$  could no longer act as a  
532 buffer to reduce slope changes, and it took much longer to reach an equilibrium slope.

533 Finally, Fig. 9 shows that the spatial as well as temporal evolution of  $\tau_{c(q_s)}^*$  can  
534 influence river profiles. The models are the same as in Fig. 6. At  $t=0$ , the feed rate into the  
535 upstream-most node ( $q_{sfeed}$ ) increases by a factor of 5. Therefore, the upstream end feels the  
536 supply perturbation both sooner and more strongly than downstream nodes. Aggradation from  
537 the supply perturbation increases upstream slopes first. In the Exner-only model, downstream  
538 slopes gradually catch up. Because  $\tau_c^*$  stays constant, every location along the channel

539 eventually asymptotes to the single slope required to transport the new  $q_{sfeed}$  at the given  
540 discharge (Fig. 9a). However, for evolving thresholds, enhanced upstream aggradation caused  
541 upstream  $\tau_{c(q_s)}^*$  to decrease both more rapidly and to lower values than downstream nodes.  
542 Spatial differences in  $\tau_{c(q_s)}^*$  persisted at equilibrium, resulting in spatial variations in  
543 equilibrium slope (Exner+  $\tau_{c(q_s)}^*$ ; Fig. 9b, 9c).

#### 544 **4 Discussion**

545 In this section, the dependence of  $\tau_{c(q_s)}^*$  on sediment supply is compared to previous  
546 work.  $\tau_{c(q_s)}^*$  evolution is identified as a negative feedback on morphologic change that can  
547 impart a memory of previous channel “states” to the system. Finally,  $\tau_{c(q_s)}^*$  is interpreted as a  
548 channel state variable, analogous to temperature in thermodynamics.

549 As described in section 1.1, previous work on sediment supply-dependent thresholds  
550 of motion includes Recking (2012), who proposed high sediment supply ( $\tau_{mss}^*$ ; Eq. 5) and low  
551 sediment supply ( $\tau_m^*$ ; Eq. 6) bounds on thresholds of motion. Fig. 10 shows how these  
552 relations compare to the experimentally-constrained  $\tau_{rs50}^*$ . It should be noted again that these  
553 bounds were calibrated to the  $D_{84}$  grain size rather than  $D_{50}$  (Recking, 2012). While the actual  
554 values are therefore not expected to be equivalent,  $\tau_{mss}^*$  and  $\tau_m^*$  do tend to bound  $\tau_{rs50}^*$ . The  
555 low-supply bound  $\tau_m^*$  is roughly 2-4 times larger than the experimental constraints. The high-  
556 supply bound  $\tau_{mss}^*$  is similar in magnitude to  $\tau_{rs50}^*$  and predicts the decrease during the feed  
557 period. The (linear) correlation between  $\tau_{mss}^*$  and  $\tau_{rs50}^*$  is weak ( $R^2=0.13$ ) although statistically  
558 significant ( $p=3E-5$ ). Nonetheless, given that threshold of motion uncertainties are typically  
559 large, Eq. (5) arguably provides a surprisingly good independent prediction of our  
560 experimental disequilibrium transport data, based on experimental slope,  $D_{84}$  and  $D_{50}$ .

561 The  $\tau_{c(q_s)}^*$  model is consistent with previous interpretations that high sediment supply  
562 corresponds to low thresholds of motion, and vice-versa (Recking, 2012; Bunte et al., 2013).  
563 In the  $\tau_{c(q_s)}^*$  model (Eq. 10), an increase in upstream sediment supply that causes net  
564 aggradation will lower  $\tau_{c(q_s)}^*$ , unless  $\tau_{c(q_s)}^*$  has already reached its lower physical limit ( $\tau_{cmin}^*$ ).  
565 Conversely, a decrease in supply that causes net erosion will increase  $\tau_{c(q_s)}^*$ , unless  $\tau_{c(q_s)}^*$  is

566 already high ( $\approx \tau_{c \max}^*$ ). However, while the  $\tau_{c(q_s)}^*$  model can thus explain an inverse relation  
567 between supply and thresholds of motion, it is worth noting that Eq. (8) and (10) describe a  
568 subtly different feedback:  $\tau_{c(q_s)}^*$  does not directly increase or decrease with supply, but rather  
569 with the history of sediment supply changes relative to transport capacity over time. If  $q_{sin}$   
570 equals  $q_{sout}$ ,  $\tau_{c(q_s)}^*$  could remain constant regardless of whether  $q_{sin}$  is high or low.

#### 571 4.1 Negative feedback and asymmetric approaches to equilibrium

572 The evolution of  $\tau_{c(q_s)}^*$  acts as a negative feedback because it reduces the  
573 morphodynamic response to perturbations. Reach slopes and  $\tau_{c(q_s)}^*$  both change in the  
574 direction that brings transport back towards equilibrium, allowing smaller slope changes to  
575 accommodate supply changes (Fig. 6, 7, 8a,b, 9). However, as with other buffered systems,  
576 there is a limit to how large of a perturbation can be accommodated by  $\tau_{c(q_s)}^*$  (as illustrated by  
577  $k=2.8E-5$  in Fig. 8c,d,e). The amount of possible  $\tau_{c(q_s)}^*$  change depends on how close  $\tau_{c(q_s)}^*$  is  
578 to  $\tau_{c \min}^*$  or  $\tau_{c \max}^*$  (Eq. 9). When changes in  $\tau_{c(q_s)}^*$  are negligible but transport and morphology  
579 are not equilibrated, then the time to equilibrium ( $t_{eq}$ ) increases because only channel  
580 morphology can adjust (Fig. 8c, d, e).

581 The experiments suggest that  $\tau_{c(q_s)}^*$  changes faster in response to aggradation than  
582 degradation (Fig. 2, 5). This asymmetry is expressed in the best-fit exponents:  $\kappa_{dep}$  is smaller  
583 than  $\kappa_{ent}$  for all scenarios tested (Table 1). Note that because  $\partial\theta_s/\partial x$  is much smaller than 1  
584 (i.e, spatial changes in bed elevation are small compared to the horizontal distance the change  
585 is measured over), the smaller exponent ( $\kappa_{dep}$ ) corresponds to a larger change in  $\tau_{c(q_s)}^*$  for a  
586 given  $\partial\theta_s/\partial x$  (Eq. 10). For a given increment of sediment thickness ( $\theta_s$ ), aggradation is  
587 more efficient at decreasing  $\tau_{c(q_s)}^*$  than degradation is at increasing  $\tau_{c(q_s)}^*$ . Future work is  
588 required to explore how specific physical processes vary during net deposition or erosion and  
589 lead to asymmetry in  $\tau_{c(q_s)}^*$  change. Still, a tentative hypothesis linking bed roughness and  
590  $\tau_{c(q_s)}^*$  change asymmetry is that during deposition, clasts tend to deposit preferentially in  
591 topographic lows, because these tend to be the most sheltered locations, and simply because  
592 of the direction of gravity. Preferentially filling in lows tends to decrease bed roughness, in

593 turn reducing topographic sheltering and hydraulic friction and increasing near-bed flow  
594 velocities. All of these factors decrease  $\tau_{c(q_s)}^*$ . However, erosion does not simply have an  
595 opposite but symmetric effect on bed topography as deposition. Clasts are not preferentially  
596 eroded from topographic lows, as these locations tend to remain the most sheltered. Instead,  
597 the process of increasing bed roughness during erosion is more complex and results from the  
598 more gradual development of stabilizing structures around keystone, as grains are rearranged  
599 locally to positions where they protrude into the flow but remain stable due to interlocking  
600 with surrounding grains. Thus, roughness reduction and enhancement should not equally  
601 sensitive to net erosion or deposition. Mao (2012) showed that bed roughness evolved at  
602 different rates during symmetric rising and falling limbs of hydrographs, influencing gravel  
603 transport hysteresis. Bed roughness due to sand ripple and dune evolution has also been  
604 shown to increase and decrease at different rates during hydrograph rising and falling limbs,  
605 leading to hysteresis in a transport system that is not threshold dominated (Martin and  
606 Jerolmack, 2013).

607 In Fig. 8c, the Exner+ $\tau_{c(q_s)}^*$  model indicates that equilibrium timescales are longer for  
608 aggradation ( $q_{sfeed} / \text{initial } q_{sfeed} > 1$ ) than for degradation. At first glance this seems to  
609 contradict the argument that aggradation is more efficient at decreasing  $\tau_{c(q_s)}^*$ . The  
610 explanation is that the equilibrium timescale does not *only* depend on the exponents, but also  
611 on how much total aggradation or degradation occurs to attain equilibrium. Slope changed  
612 more during aggradation than degradation for these particular Exner+ $\tau_{c(q_s)}^*$  models, even  
613 though  $\tau_{c(q_s)}^*$  also tended to change more during aggradation than degradation (Fig. 8a, 8e).

614 In the experiments, average slopes changed very little in response to changes in  
615 sediment supply and transport disequilibrium, while grain size and bed surface roughness  
616 changed much more (Fig. 2; bed roughness is presented in detail in Johnson et al., 2015).  
617 Because the W&CM accounted for surface grain size changes in determining experimental  
618  $\tau_{rs50}^*$  (Fig. 3), bed roughness and various unquantified mechanisms (such as grain  
619 interlocking) are interpreted to have physically caused the  $\tau_{rs50}^*$  evolution. What does this  
620 suggest for  $k$ , which scales how much  $\tau_{c(q_s)}^*$  changes for a given amount of aggradation or  
621 degradation? The best-fit  $k$  was  $2.83\text{E-}3 \text{ s}^{-1}$ , which reflects the rapid adjustment of  
622 experimental  $\tau_{c(q_s)}^*$  compared to slope changes (Fig. 5, Table 1, Eq 10). In contrast, the

623 morphodynamic modeling used  $k$  values adjusted to be 2 to 3 orders of magnitude smaller, so  
624 that the response to a perturbation in supply would involve non-negligible changes in slope  
625 (the only morphologic variable in the simple morphodynamic model) as well as in  $\tau_{c(q_s)}^*$ .  
626 Higher values of  $k$  in the morphodynamic model cause  $\tau_{c(q_s)}^*$  to adjust more rapidly and slope  
627 to adjust less (Fig. 8).

628 An implication of  $\tau_{c(q_s)}^*$  evolving with reach morphodynamics is that local channel  
629 form can retain “memories” of previous conditions, which can influence local responses to  
630 subsequent forcing. In Fig. 9b and 9c, an increase in supply led to the temporal and spatial  
631 evolution of  $\tau_{c(q_s)}^*$ , which in turn caused spatial variations in equilibrium slope. Upstream  
632 reaches acted as filters of the supply perturbation to downstream reaches. In nature, spatially  
633 and temporally-averaged morphodynamic equilibrium will reflect “channel-forming”  
634 discharges and a representative sediment supply from upstream, but floods, local supply  
635 perturbations and history add to spatial variability in both  $\tau_{c(q_s)}^*$  and morphology. I also  
636 acknowledge that the model parameters were calibrated to flume experiments at steep 8% and  
637 12% slopes with a GSD that includes scaled boulders (Table 1; Johnson et al., 2015); future  
638 work is required to determine how the surface GSD influences the strength of  $\tau_{c(q_s)}^*$  evolution,  
639 and how well the model predicts  $\tau_{c(q_s)}^*$  changes in lower slope gravel-bed rivers.

#### 640 4.2 State variable framework for modeling morphodynamics

641 Next, I argue that  $\tau_{c(q_s)}^*$  should be redefined as a state variable (or state function) for  
642 gravel-bed channels, and outline a possible state variable approach for modeling the  
643 morphodynamic evolution of channels. The term “bed state” has long been informally used to  
644 describe collective aspects of local channel morphology, such as surface GSD and armoring  
645 and clustering, that change with relative ease and influence transport rates (e.g., Church,  
646 2006; Gomez and Church, 1989). Although explicitly defining  $\tau_{c(q_s)}^*$  evolution and related  
647 feedbacks in terms of state and path variables appears to be novel (to my knowledge), channel  
648 morphodynamics have long been implicitly described using similar ideas. For example,  
649 Phillips (2007) presented a qualitative conceptual model of landscape evolution in terms of  
650 improbable system states, arguing that although deterministic process “laws” act on  
651 topography, the actual outcome (i.e., any particular landscape) depends on initial conditions



652 and in particular is sensitive to history. Many other works have similarly generalized complex  
653 channel process and response feedbacks to understand morphodynamics (e.g., Fonstad, 2003;  
654 Phillips, 2011, 2009; Chin and Phillips, 2007; Phillips, 1991; Stark and Stark, 2001; Yanites  
655 and Tucker, 2010).

656 State variables are integral to many disciplines, including control systems engineering  
657 and thermodynamics. Thermodynamic state variables include temperature, pressure, enthalpy  
658 and entropy. By definition state variables are path-independent (Oxtoby et al., 2015). For  
659 example, temperature ( $T$ ) describes the amount of thermal energy per unit of a material. A  
660 change in temperature depends only on the initial and final states (i.e.,  $\Delta T = T_2 - T_1$ ), but does  
661 not depend on the path, i.e. the history of temperatures between times  $t_2$  and  $t_1$ . In contrast,  
662 heat--the flow (transfer) of thermal energy--is a path variable (or process variable), not a state  
663 variable. Heat flow between bodies is both controlled by and changes the temperature of those  
664 bodies, but the amount of total heat transferred does depend on the path. Three other points  
665 about state variables are relevant to morphodynamics. First, state variables are rarely  
666 independent of one another. For example, Gibbs free energy is a state variable calculated from  
667 temperature, enthalpy and entropy (Hemond and Fechner, 2014). Second, although state  
668 variables are technically only defined at equilibrium, in practice they are useful for  
669 understanding gradually evolving systems (e.g., Kleidon, 2010). Third, the evolution of  
670 systems involving multiple state variables are usually described with coupled differential  
671 equations.

672 Channel morphodynamics can be described by a similar framework of state and path  
673 variables. Analogous to heat, the cumulative discharges of both water and sediment are path  
674 variables that drive bed state evolution. Channel morphology can be described by numerous  
675 bed state variables, including but not limited to surface GSD, slope, width, depth, bed  
676 roughness, surface grain clustering, interlocking, overlap and imbrication, and finally  $\tau_{c(q_s)}^*$ .  
677 Analogous to temperature, I explicitly define  $\tau_{c(q_s)}^*$  as a state variable. The amount of change  
678 change in  $\tau_{c(q_s)}^*$  from time  $t_1$  to  $t_2$  does not depend on the progression of values in between.  
679 However, the amount of sediment transported between  $t_1$  and  $t_2$  does depend on the history of  
680  $\tau_{c(q_s)}^*$ , and also influences the history of  $\tau_{c(q_s)}^*$  (Eq. 8, 10).

681 Entropy is the state variable perhaps used most often to characterize channel systems  
682 (e.g., Chin and Phillips, 2007; Leopold and Langbein, 1962; Rodriguez-Iturbe and Rinaldo,

683 1997). Entropy can provide a closure for underconstrained sets of equations, by assuming that  
684 geomorphic systems inherently maximize their entropy at equilibrium (Kleidon, 2010; Chiu,  
685 1987). A limitation of some maximum-entropy landscape models is that physically-based  
686 surface processes are not always explicitly modeled, making them less useful for predicting  
687 landscape responses to environmental perturbations, even if they can create reasonable  
688 equilibrium morphologies (Paik and Kumar, 2010). In contrast to entropy, state variable  $\tau_{c(q_s)}^*$   
689 has a clear process-based meaning.

690 I suggest that landscape evolution models could incorporate subgrid-scale channel  
691 feedbacks by treating  $\tau_{c(q_s)}^*$  as a state variable. Conceptually, the  $\tau_{c(q_s)}^*$  model “lumps“  
692 processes related to multiple bed state variables (sections 1.1, 2.1). Similarly, because many  
693 *channel* state variables influence transport and therefore are not independent of  $\tau_{c(q_s)}^*$ , I  
694 hypothesize that aspects of morphology can be implicitly subsumed into evolving  $\tau_{c(q_s)}^*$  for  
695 modeling purposes, because  $\tau_{c(q_s)}^*$  captures essential feedbacks over spatial and temporal  
696 scales of interest. This is similar to the channelization approach of Stark and Stark (2001).

#### 697 4.3 Form drag vs. parsimony

698 Calculations of best-fit  $\tau_{rs50}^*$  and transport rates used total shear stress (Eq. 12), rather  
699 than partitioning stress into form drag and a lower effective stress for calculating transport  
700 rates (skin friction). Although not a state variable, form drag is physically justifiable because  
701 larger clasts that protrude higher into the flow (e.g. stable boulders) tend to account for a  
702 disproportionate amount of the total stress through drag, turbulence generation and pressure  
703 gradients. Form drag corrections have been incorporated into many transport models to enable  
704 reasonable transport rates to be calculated using  $\tau_c^*$  values typical of systems without form  
705 drag (e.g., Rickenmann and Recking, 2011; David et al., 2011; Yager et al., 2012a).  
706 Conversely, another common approach (and that taken here) is simply to use higher  $\tau_c^*$  (e.g.,  
707 Bunte et al., 2013; Lenzi et al., 2006), consistent with acknowledging that  $\tau_c^*$  can be a  
708 physically meaningful fitting parameter to predict transport. Using field data, Schneider et al.  
709 (2015) recently compared gravel transport predictions based on (a) form drag corrections and  
710 (b) higher reference stresses. For the most part, they found that both approaches could provide  
711 similar accuracy. They also noted that “uncertainties in predicted transport rates remain huge

712 (up to roughly 3 orders of magnitude)” (Schneider et al., 2015), and suggested that factors  
713 including supply effects may account for remaining discrepancies. Although beyond the scope  
714 of the present analysis, form drag effects could be separated from best-fit  $\tau_{rs50}^*$  by using a  
715 calculated skin friction stress rather than total stress. However, doing so would add extra  
716 uncertainty to the shear stresses, while still not directly accounting for effects of sediment  
717 supply. Implicitly subsuming form drag into  $\tau_{c(q_s)}^*$  arguably provides a simpler and more  
718 parsimonious approach for modeling transport and morphodynamics.

## 719 **5 Conclusions**

720 I propose a new model in which feedback causes  $\tau_{c(q_s)}^*$ , the nondimensional critical shear  
721 stress for gravel transport, to evolve through time as a function of sediment transport  
722 disequilibrium (Eq. 8, 10). Net erosion tends to increase local  $\tau_{c(q_s)}^*$  (reducing transport rates),  
723 while net deposition tends to decrease  $\tau_{c(q_s)}^*$  (increasing transport rates). Laboratory flume  
724 experiments described by Johnson et al. (2015) are used to evaluate the proposed  $\tau_{c(q_s)}^*$   
725 model. The experiments intentionally explored disequilibrium bedload transport and  
726 morphodynamic adjustment. Thresholds of motion were back-calculated from the  
727 experimental data using the Wilcock and Crowe (2003) model for mixed grain size transport.  
728 I also show that the Wilcock and Crowe (2003) hiding function is consistent with our  
729 experimental data, supporting its applicability to steep channels.

730 After empirically calibrating three model parameters, the  $\tau_{c(q_s)}^*$  model—a differential  
731 equation--can explain nearly 70% of the variability in experimental thresholds of motion. I  
732 then incorporate  $\tau_{c(q_s)}^*$  into a simple morphodynamic model for channel profile evolution.  
733 Changes in  $\tau_{c(q_s)}^*$  are negative feedbacks on morphodynamic response, because not only slope  
734 but also  $\tau_{c(q_s)}^*$  evolve when perturbed.

735 Finally,  $\tau_{c(q_s)}^*$  is redefined to be a state variable for fluvial channels. State functions and  
736 path functions are fundamental to many disciplines such as thermodynamics, because they  
737 allow the evolution of systems to be calculated. The same should be true for  
738 morphodynamics. Conceptualizing landscape evolution models in terms of feedbacks among  
739 evolving state variables and path functions may improve our ability to predict landscape  
740 responses to land use, climate change and tectonic forcing.

741

742 **Acknowledgements**

743 I thank Alex Aronovitz for conducting the flume experiments, Wonsuck Kim for aiding in the  
744 experimental design, Lindsay Olinde for helpful discussions, and Mike Lamb and Jeff  
745 Prancevic for sharing their  $\tau_c^*$  compilation. I also thank Jens Turowski, two anonymous  
746 reviewers and AE Daniel Parsons for constructive feedback. Support came from NSF grant  
747 EAR-1053508.

748

749 **Appendix 1 List of variables**

|     |                 |                                                                                |
|-----|-----------------|--------------------------------------------------------------------------------|
| 750 | $A_r$           | Dimensionless parameter for incorporating grain size or roughness ratios in    |
| 751 |                 | Eq. (10) [1]                                                                   |
| 752 | $b$             | Dimensionless hiding function exponent; either described by Eq. (16) or fit as |
| 753 |                 | a single value [1]                                                             |
| 754 | $B$             | Dimensionless “feedback factor”; Eq. (9) [1]                                   |
| 755 | $c_1, c_2, c_3$ | Dimensionless empirical constants in Eq. (4) [1]                               |
| 756 | $D$             | Grain diameter, for model cases with a single size only [L]                    |
| 757 | $D_{50}$        | Median grain diameter [L]                                                      |
| 758 | $D_{s50}$       | Median grain diameter of bed surface [L]                                       |
| 759 | $D_i$           | Grain diameter of size class $i$ [L]                                           |
| 760 | $f$             | Darcy-Weisbach hydraulic friction coefficient; Eq. (17) [1]                    |
| 761 | $Fr$            | Froude number [1]                                                              |
| 762 | $F_i$           | Areal fraction of grain size class $i$ on the bed surface; Eq. 13 [1]          |
| 763 | $F_s$           | Areal fraction of sand on the bed surface; Eq. 4 [1]                           |
| 764 | $g$             | Gravitational acceleration [ $LT^{-2}$ ]                                       |
| 765 | $h$             | Water depth [L]                                                                |

|     |                |                                                                                 |
|-----|----------------|---------------------------------------------------------------------------------|
| 766 | $\kappa_{dep}$ | Exponent for net deposition in $\tau_c^*$ -evolution models; Eq. (8), (10). [1] |
| 767 | $\kappa_{ent}$ | Exponent for net erosion in $\tau_c^*$ -evolution models; Eq. (8), (10). [1]    |
| 768 | $k$            | Scaling factor for $\tau_c^*$ evolution. Dimensions are [1/T] for Eq. (10)      |
| 769 | $\lambda_p$    | Bed porosity [1]                                                                |
| 770 | $q_{bi}$       | Volume sediment flux per unit width of size class $i$ in Wilcock and Crowe      |
| 771 |                | (2003); Eq. 13 [ $L^2/T$ ]                                                      |
| 772 | $q_s$          | Volume sediment flux per unit width [ $L^2/T$ ]                                 |
| 773 | $q_s^*$        | Nondimensional volume sediment flux; Eq. (1) [1]                                |
| 774 | $q_{sin}$      | Sediment flux entering a channel bed area (reach) of interest [ $L^2/T$ ]       |
| 775 | $q_{sout}$     | Sediment flux exiting a channel bed area (reach) of interest [ $L^2/T$ ]        |
| 776 | $q_{sfeed}$    | Sediment flux entering upstream end of overall model domain [ $L^2/T$ ]         |
| 777 | $q_w$          | Volume water discharge per unit width [ $L^2/T$ ]                               |
| 778 | $\rho$         | Water density [ $M/L^3$ ]                                                       |
| 779 | $\rho_s$       | Sediment density [ $M/L^3$ ]                                                    |
| 780 | $S$            | Water surface slope [1]                                                         |
| 781 | $S_{eq}$       | Water surface slope when reach is at equilibrium [1]                            |
| 782 | $\sigma$       | Bed roughness, measured here as the standard deviation of detrended bed         |
| 783 |                | elevations [L]                                                                  |
| 784 | $\theta_s$     | Thickness of sediment deposited or eroded in a time interval; Eq. (10) [L]      |
| 785 | $t$            | Time [T]                                                                        |
| 786 | $t_{eq}$       | Equilibrium timescale for morphological adjustment [T]                          |
| 787 | $\tau$         | Shear stress; Eq. (3), (12) [ $MT^{-2}L^{-1}$ ]                                 |
| 788 | $\tau^*$       | Shields stress (nondimensional shear stress) [1]                                |

|     |                   |                                                                                    |
|-----|-------------------|------------------------------------------------------------------------------------|
| 789 | $\tau_c^*$        | Critical Shields stress (nondimensional critical shear stress); Eq. (1) [1]        |
| 790 | $\tau_{c(q_s)}^*$ | Critical Shields stress in new threshold evolution model; Eq. (8), (10) [1]        |
| 791 | $\tau_{c \max}^*$ | Imposed maximum bound for $\tau_{c(q_s)}^*$ in Eq. (9) [1]                         |
| 792 | $\tau_{c \min}^*$ | Imposed minimum bound for $\tau_{c(q_s)}^*$ in Eq. (9) [1]                         |
| 793 | $\tau_{mss}^*$    | High sediment supply nondimensional reference stress end-member bound in           |
| 794 |                   | Recking (2012) transport model; Eq. (5) [1]                                        |
| 795 | $\tau_m^*$        | Low sediment supply nondimensional reference stress end-member bound in            |
| 796 |                   | (Recking, 2012) transport model; Eq. (6) [1]                                       |
| 797 | $\tau_{ri}^*$     | Reference Shields stress for size class $i$ , from Wilcock and Crowe (2003) (Eq.   |
| 798 |                   | 15) [1]                                                                            |
| 799 | $\tau_{rm}^*$     | Reference Shields stress for geometric mean surface diameter, Eq. (4) [1]          |
| 800 | $\tau_{rs50}^*$   | Nondimensional reference Shields stress for surface grains of size $D_{s50}$ , Eq. |
| 801 |                   | (15) [1]                                                                           |
| 802 | $U$               | Depth-averaged water velocity, Eq. (17), (18) [L]                                  |
| 803 | $u_\tau$          | Shear velocity; Eq. (13) [L/T]                                                     |
| 804 | $x$               | Position measured horizontally (distance along channel) [L]                        |
| 805 | $z$               | Position measured vertically (bed elevation)[L]                                    |
| 806 | $W_i^*$           | Nondimensional bedload transport rate for grain size class $i$ , in Wilcock and    |
| 807 |                   | Crowe (2003), Eq. (13), (14) [1]                                                   |
| 808 | W&CM              | Abbreviation for Wilcock and Crowe (2003) transport model.                         |

809

## 810 Captions

811 Figure 1. Threshold of motion data from both field and experimental studies. A power law  
812 regression to these data gives  $R^2=0.34$ , indicating that a majority of the variability is not  
813 explained by slope alone. Dotted lines indicate common range of  $\tau_c^*=0.03$  to 0.06 often

814 assumed for modeling transport, although measured data fall well out of this range. Data have  
815 been additionally filtered to only include  $D_{50} > 2$  mm (i.e. gravel) and slopes between 0.002  
816 and 0.2. Data were compiled and provided by Prancevic and Lamb (2015), based in part on  
817 Buffington and Montgomery (1997), with additional data from Olinde (2015) and Lenzi et al.  
818 (2006).

819

820 Figure 2. Flume experiment data (Johnson et al., 2015). a. Sediment transport rate in ( $Q_{sfeed}$ )  
821 and out of the flume. The upstream sediment supply rate was zero other than during the  $Q_{sfeed}$   
822 period. Experiment 1 was run for a longer duration than the others but shows similar trends.  
823 Note that the outlet  $Q_s$  adjusts much faster to match the increase in supply than it does to  
824 decrease during periods of no input. b. Median bed surface grain diameters decreased during  
825 the feed of finer gravel, and then increase beyond their previous stable bed. c. Flume-averaged  
826 bed slopes changed relatively little even as transport rates and  $D_{50}$  changed greatly in response  
827 to initial bed stabilizing and supply perturbations.

828

829 Figure 3.  $\tau_{rs50}^*$  fits to the experimental data with the W&CM. , “W&CM fit“ uses Eq. (16) to  
830 calculate hiding function exponent  $b$ , while “Power-law fit“ calculates a best-fit  $b$  along with  
831  $\tau_{rs50}^*$ . Error bars give 95% confidence intervals on  $\tau_{rs50}^*$  based on the regressions; although  
832 uncertainty can be broad the trends are clear and consistent. Shaded area indicates times of  
833 fine gravel addition (sediment feed) in each experiment.

834

835 Figure 4. Data points are based on power-law fits to exponent  $b$ . The W&CM hiding function  
836 (Eq. 16) does a good job matching the data, although it was not fit to these points. The first 6  
837 measurements of each experiment (roughly the first 10 minutes) were excluded because of  
838 large scatter associated with the greatest bed instability. The axes reflect the left and right  
839 hand sides of Eq. (15), but uses dimensional stresses to be consistent with plots shown in  
840 Wilcock and Crowe (2003).

841

842 Figure 5. Best-fit models (Eq. 4, 8 and 10) compared to experimental constraints. The periods  
843 of upstream sediment supply ( $Q_{sfeed}$ ) are indicated by the grey boxes for each experiment.

844

845 Figure 6. Profile evolution, comparing the morphodynamic responses of models with and  
846 without threshold evolution. The initial condition is an equilibrium channel with  $\tau_{c(q_s)}^*=0.06$ ,  
847 upstream sediment supply  $q_s=1e-3$  m<sup>2</sup>/s, and an initial equilibrium slope of 0.0147. Sediment  
848 supply is increased 5x at  $t=0$ . Lines are each 5 model days apart, and indicate the evolution to  
849 a new transport equilibrium.

850

851 Figure 7. Slope and critical shear stress evolution, for sediment supply increases (which  
852 correspond to Fig. 6 models) and decreases by factors of 5. As in figure 6,  $t=0$  corresponds to  
853 an equilibrium condition where the initial slope and initial threshold are consistent with the  
854 initial upstream sediment supply. Slope and  $\tau_{c(q_s)}^*$  were averaged over nodes 3-10, leaving out  
855 the first and last two nodes because of minor model boundary effects.

856

857 Figure 8. Morphodynamic model sensitivity to sediment supply perturbations and  $k$ . All  
858 models started at the same equilibrium condition as shown in Fig. 6 and 7. a. Slope  
859 adjustment, normalized by the initial equilibrium slope. The correspondence of Eq. 20 and the  
860 morphodynamic model calculations demonstrate that the models did asymptotically attain  
861 equilibrium slopes. b.  $S_{eq}$  ratio is the ratio of equilibrium slopes of the Exner+ $\tau_{c(q_s)}^*$  model  
862 divided by  $S_{eq}$  for the Exner-only model, to show the relative affect that that  $\tau_c^*$  evolution has  
863 on equilibrium slopes. c. Equilibrium timescales for model adjustment. d.  $t_{eq}$  ratio is the ratio  
864 of  $t_{eq}$  for the Exner+ $\tau_{c(q_s)}^*$  model divided by  $t_{eq}$  for the Exner-only model. Values are lower  
865 than 1, indicating that the  $\tau_c^*$  evolution has a large influence on equilibrium timescales. e.  
866 Evolution of  $\tau_{c(q_s)}^*$ .

867

868 Figure 9. Spatial and temporal evolution of morphodynamic slopes, for the same models  
869 shown in Fig. 6. Slope is initially at equilibrium and responds to the 5x increase in upstream  
870 sediment supply at  $t=0$ . a. The Exner-only model initially has spatial slope variability, but



871 evolves to a uniform new equilibrium slope. b, c. In the Exner+ $\tau_{c(q_s)}^*$  model, spatial variability  
872 in both slope and  $\tau_{c(q_s)}^*$  persist even at equilibrium.

873

874 Figure 10. Comparison of experimental and best-fit model constraints on  $\tau_{rs50}^*$ , compared to  
875 proposed constraints for  $D_{84}$  reference stress bounds for low and high sediment supply from  
876 Recking (2012).

877

878

879

880 **References**

- 881 Ancey, C., Davison, A. C., Bohm, T., Jodeau, M., and Frey, P.: Entrainment and motion of  
882 coarse particles in a shallow water stream down a steep slope, *Journal of Fluid Mechanics*,  
883 595, 83-114, doi:10.1017/s0022112007008774, 2008.
- 884 Buffington, J. M., and Montgomery, D. R.: A systematic analysis of eight decades of incipient  
885 motion studies, with special reference to gravel-bedded rivers, *Water Resources Research*, 33,  
886 1993-2029, doi:10.1029/97wr03190, 1997.
- 887 Buffington, J. M.: The legend of A. F. Shields, *Journal of Hydraulic Engineering-Asce*, 125,  
888 376-387, doi:10.1061/(asce)0733-9429(1999)125:4(376), 1999.
- 889 Bunte, K., Abt, S. R., Swingle, K. W., Cenderelli, D. A., and Schneider, J. M.: Critical  
890 Shields values in coarse-bedded steep streams, *Water Resources Research*, 49, 7427-7447,  
891 doi:10.1002/2012wr012672, 2013.
- 892 Buscombe, D., and Conley, D. C.: Effective shear stress of graded sediments, *Water*  
893 *Resources Research*, 48, 13, doi:10.1029/2010wr010341, 2012.
- 894 Celik, A. O., Diplas, P., Dancy, C. L., and Valyrakis, M.: Impulse and particle dislodgement  
895 under turbulent flow conditions, *Physics of Fluids*, 22, doi:10.1063/1.3385433, 2010.
- 896 Chen, L., and Stone, M. C.: Influence of bed material size heterogeneity on bedload transport  
897 uncertainty, *Water Resources Research*, 44, doi:10.1029/2006wr005483, 2008.
- 898 Chin, A., and Phillips, J. D.: The self-organization of step-pools in mountain streams,  
899 *Geomorphology*, 83, 346-358, doi:10.1016/j.geomorph.2006.02.021, 2007.
- 900 Chiu, C. L.: Entropy and Probability Concepts in Hydraulics, *Journal of Hydraulic*  
901 *Engineering*, 113, 583-599, doi:doi:10.1061/(ASCE)0733-9429(1987)113:5(583), 1987.
- 902 Church, M., Hassan, M. A., and Wolcott, J. F.: Stabilizing self-organized structures in gravel-  
903 bed stream channels: Field and experimental observations, *Water Resources Research*, 34,  
904 3169-3179, doi:10.1029/98wr00484, 1998.
- 905 Church, M.: Bed material transport and the morphology of alluvial river channels, *Annual*  
906 *Review of Earth and Planetary Sciences*, 34, 325-354,  
907 doi:10.1146/annurev.earth.33.092203.122721, 2006.
- 908 Curran, J. C., and Wilcock, P. R.: Effect of sand supply on transport rates in a gravel-bed  
909 channel, *Journal of Hydraulic Engineering-Asce*, 131, 961-967, doi:10.1061/(asce)0733-  
910 9429(2005)131:11(961), 2005.
- 911 David, G. C. L., Wohl, E., Yochum, S. E., and Bledsoe, B. P.: Comparative analysis of bed  
912 resistance partitioning in high-gradient streams, *Water Resources Research*, 47,  
913 doi:10.1029/2010wr009540, 2011.
- 914 Dietrich, W. E., Kirchner, J. W., Ikeda, H., and Iseya, F.: Sediment supply and the  
915 development of the coarse surface-layer in gravel-bedded rivers, *Nature*, 340, 215-217,  
916 doi:10.1038/340215a0, 1989.
- 917 Diplas, P., Dancy, C. L., Celik, A. O., Valyrakis, M., Greer, K., and Akar, T.: The Role of  
918 Impulse on the Initiation of Particle Movement Under Turbulent Flow Conditions, *Science*,  
919 322, 717-720, doi:10.1126/science.1158954, 2008.

- 920 Fonstad, M. A.: Spatial variation in the power of mountain streams in the Sangre de Cristo  
921 Mountains, New Mexico, *Geomorphology*, 55, 75-96, doi:10.1016/s0169-555x(03)00133-8,  
922 2003.
- 923 Furbish, D. J., Haff, P. K., Roseberry, J. C., and Schmeeckle, M. W.: A probabilistic  
924 description of the bed load sediment flux: 1. Theory, *J. Geophys. Res.-Earth Surf.*, 117, 21,  
925 doi:10.1029/2012jf002352, 2012.
- 926 Gilbert, G. K.: The transportation of debris by running water, United States Geological  
927 Survey Professional Paper, 86, 1914.
- 928 Gogus, M., and Defne, Z.: Effect of shape on incipient motion of large solitary particles,  
929 *Journal of Hydraulic Engineering-Asce*, 131, 38-45, doi:10.1061/(asace)0733-  
930 9429(2005)131:1(38), 2005.
- 931 Gomez, B., and Church, M.: An assessment of bed load sediment transport formulae for  
932 gravel rivers, *Water Resources Research*, 25, 1161-1186, doi:10.1029/WR025i006p01161,  
933 1989.
- 934 Hemond, H. F., and Fechner, E. J.: *Chemical fate and transport in the environment*, Elsevier,  
935 2014.
- 936 Iseya, F., and Ikeda, H.: Pulsations in Bedload Transport Rates Induced by a Longitudinal  
937 Sediment Sorting - a Flume Study Using Sand and Gravel Mixtures, *Geogr. Ann. Ser. A-  
938 Phys. Geogr.*, 69, 15-27, 1987.
- 939 Jackson, W. L., and Beschta, R. L.: Influences of increased sand delivery on the morphology  
940 of sand and gravel channels, *JAWRA Journal of the American Water Resources Association*,  
941 20, 527-533, doi:10.1111/j.1752-1688.1984.tb02835.x, 1984.
- 942 Jerolmack, D. J.: Causes and effects of noise in landscape dynamics, *Eos, Transactions  
943 American Geophysical Union*, 92, 385-386, doi:10.1029/2011EO440001, 2011.
- 944 Johnson, J. P. L., Aronovitz, A. C., and Kim, W.: Coarser and rougher: Effects of fine gravel  
945 pulses on experimental step-pool channel morphodynamics, *Geophys. Res. Lett.*, 42, 8432-  
946 8440, doi:10.1002/2015gl066097, 2015.
- 947 Kirchner, J. W., Dietrich, W. E., Iseya, F., and Ikeda, H.: The Variability of Critical Shear-  
948 Stress, Friction Angle, and Grain Protrusion in Water-Worked Sediments, *Sedimentology*, 37,  
949 647-672, doi:10.1111/j.1365-3091.1990.tb00627.x, 1990.
- 950 Kleidon, A.: A basic introduction to the thermodynamics of the Earth system far from  
951 equilibrium and maximum entropy production, *Philos. Trans. R. Soc. B-Biol. Sci.*, 365, 1303-  
952 1315, doi:10.1098/rstb.2009.0310, 2010.
- 953 Lamb, M. P., Dietrich, W. E., and Venditti, J. G.: Is the critical Shields stress for incipient  
954 sediment motion dependent on channel-bed slope?, *Journal of Geophysical Research*, 113,  
955 F02008, doi:10.1029/2007jf000831, 2008.
- 956 Lenzi, M. A., Mao, L., and Comiti, F.: When does bedload transport begin in steep boulder-  
957 bed streams?, *Hydrological Processes*, 20, 3517-3533, doi:10.1002/hyp.6168, 2006.
- 958 Leopold, L. B., and Langbein, W. B.: *The concept of entropy in landscape evolution*, US  
959 Government Printing Office Washington, DC, USA, 1962.
- 960 Mackin, J. H.: Concept of the graded river, *Geol. Soc. Am. Bull.*, 101, 1373-1388, 1948.

- 961 Mao, L. C.: The effect of hydrographs on bed load transport and bed sediment spatial  
962 arrangement, *J. Geophys. Res.-Earth Surf.*, 117, doi:10.1029/2012jf002428, 2012.
- 963 Marquis, G. A., and Roy, A. G.: Using multiple bed load measurements: Toward the  
964 identification of bed dilation and contraction in gravel-bed rivers, *J. Geophys. Res.-Earth*  
965 *Surf.*, 117, 16, doi:10.1029/2011jf002120, 2012.
- 966 Martin, R. L., Jerolmack, D. J., and Schumer, R.: The physical basis for anomalous diffusion  
967 in bed load transport, *J. Geophys. Res.-Earth Surf.*, 117, 18, doi:10.1029/2011jf002075, 2012.
- 968 Martin, R. L., and Jerolmack, D. J.: Origin of hysteresis in bed form response to unsteady  
969 flows, *Water Resources Research*, 49, 1314-1333, doi:10.1002/wrcr.20093, 2013.
- 970 Measures, R., and Tait, S.: Quantifying the role of bed surface topography in controlling  
971 sediment stability in water-worked gravel deposits, *Water Resources Research*, 44,  
972 doi:10.1029/2006wr005794, 2008.
- 973 Meyer-Peter, E., and Müller, R.: Formulas for bed-load transport, *Proceedings, Second*  
974 *Congress, International Association for Hydraulic Structures Research, Stockholm*, 39-64,  
975 1948.
- 976 Nelson, P. A., Venditti, J. G., Dietrich, W. E., Kirchner, J. W., Ikeda, H., Iseya, F., and Sklar,  
977 L. S.: Response of bed surface patchiness to reductions in sediment supply, *J. Geophys. Res.-*  
978 *Earth Surf.*, 114, doi:10.1029/2008jf001144, 2009.
- 979 Nitsche, M., Rickenmann, D., Turowski, J. M., Badoux, A., and Kirchner, J. W.: Evaluation  
980 of bedload transport predictions using flow resistance equations to account for macro-  
981 roughness in steep mountain streams, *Water Resources Research*, 47,  
982 doi:10.1029/2011wr010645, 2011.
- 983 Ockelford, A.-M., and Haynes, H.: The impact of stress history on bed structure, *Earth*  
984 *Surface Processes and Landforms*, 38, 717-727, doi:10.1002/esp.3348, 2013.
- 985 Olinde, L.: Displacement and entrainment behavior of bedload clasts in mountain streams,  
986 Ph.D., Geological Sciences, The University of Texas at Austin, Austin, Texas, 139 pp., 2015.
- 987 Olinde, L., and Johnson, J. P. L.: Using RFID and accelerometer-embedded tracers to  
988 measure probabilities of bed load transport, step lengths, and rest times in a mountain stream,  
989 *Water Resources Research*, 51, 7572-7589, doi:10.1002/2014wr016120, 2015.
- 990 Oxtoby, D., Gillis, H., and Butler, L.: *Principles of modern chemistry*, Cengage Learning,  
991 2015.
- 992 Paik, K., and Kumar, P.: Optimality approaches to describe characteristic fluvial patterns on  
993 landscapes, *Philos. Trans. R. Soc. B-Biol. Sci.*, 365, 1387-1395, doi:10.1098/rstb.2009.0303,  
994 2010.
- 995 Paola, C., and Voller, V. R.: A generalized Exner equation for sediment mass balance, *J.*  
996 *Geophys. Res.-Earth Surf.*, 110, F04014, doi:10.1029/2004JF000274., 2005.
- 997 Parker, G., and Klingeman, P. C.: On Why Gravel Bed Streams Are Paved, *Water Resources*  
998 *Research*, 18, 1409-1423, doi:10.1029/WR018i005p01409, 1982.
- 999 Parker, G., Klingeman, P. C., and McLean, D. G.: Bedload size distribution in paved gravel-  
1000 bed streams, *American Society of Civil Engineers, Journal of Hydraulics Division*, 108, 1757-  
1001 1760, 1982.

- 1002 Parker, G.: Surface-based bedload transport relation for gravel rivers, *Journal of Hydraulic*  
1003 *Research*, 28, 417-436, doi:10.1080/00221689009499058, 1990.
- 1004 Parker, G., and Toro-Escobar, C. M.: Equal mobility of gravel in streams: The remains of the  
1005 day, *Water Resources Research*, 38, doi:10.1029/2001wr000669, 2002.
- 1006 Phillips, C. B., Martin, R. L., and Jerolmack, D. J.: Impulse framework for unsteady flows  
1007 reveals superdiffusive bed load transport, *Geophys. Res. Lett.*, 40, 1328-1333,  
1008 doi:10.1002/grl.50323, 2013.
- 1009 Phillips, J. D.: Multiple modes of adjustment in unstable river channel cross-sections, *Journal*  
1010 *of Hydrology*, 123, 39-49, doi:10.1016/0022-1694(91)90067-R, 1991.
- 1011 Phillips, J. D.: The perfect landscape, *Geomorphology*, 84, 159-169,  
1012 doi:10.1016/j.geomorph.2006.01.039, 2007.
- 1013 Phillips, J. D.: Changes, perturbations, and responses in geomorphic systems, *Progress in*  
1014 *Physical Geography*, 33, 17-30, doi:10.1177/0309133309103889, 2009.
- 1015 Phillips, J. D.: Emergence and pseudo-equilibrium in geomorphology, *Geomorphology*, 132,  
1016 319-326, doi:10.1016/j.geomorph.2011.05.017, 2011.
- 1017 Powell, D. M., and Ashworth, P. J.: Spatial pattern of flow competence and bed-load transport  
1018 in a divided gravel-bed river, *Water Resources Research*, 31, 741-752,  
1019 doi:10.1029/94wr02273, 1995.
- 1020 Prancevic, J. P., and Lamb, M. P.: Unraveling bed slope from relative roughness in initial  
1021 sediment motion, *J. Geophys. Res.-Earth Surf.*, 120, 474-489, doi:10.1002/2014jf003323,  
1022 2015.
- 1023 Recking, A.: Influence of sediment supply on mountain streams bedload transport,  
1024 *Geomorphology*, 175, 139-150, doi:10.1016/j.geomorph.2012.07.005, 2012.
- 1025 Richards, K., and Clifford, N.: Fluvial geomorphology: structured beds in gravelly rivers,  
1026 *Progress in Physical Geography*, 15, 407-422, doi:10.1177/030913339101500404, 1991.
- 1027 Rickenmann, D.: Comparison of bed load transport in torrents and gravel bed streams, *Water*  
1028 *Resources Research*, 37, 3295-3305, doi:10.1029/2001WR000319, 2001.
- 1029 Rickenmann, D., and Recking, A.: Evaluation of flow resistance in gravel-bed rivers through  
1030 a large field data set, *Water Resources Research*, 47, doi:10.1029/2010wr009793, 2011.
- 1031 Rodriguez-Iturbe, I., and Rinaldo, A.: *Fractal River Networks: Chance and Self-*  
1032 *Organization*, Cambridge University Press, New York, 1997.
- 1033 Sanguinito, S., and Johnson, J.: Quantifying gravel overlap and dislodgement forces on  
1034 natural river bars: implications for particle entrainment, *Earth Surface Processes and*  
1035 *Landforms*, 37, 134-141, doi:10.1002/esp.2237, 2012.
- 1036 Schmeeckle, M. W., and Nelson, J. M.: Direct numerical simulation of bedload transport  
1037 using a local, dynamic boundary condition, *Sedimentology*, 50, 279-301, doi:10.1046/j.1365-  
1038 3091.2003.00555.x, 2003.
- 1039 Schneider, J. M., Rickenmann, D., Turowski, J. M., Bunte, K., and Kirchner, J. W.:  
1040 Applicability of bed load transport models for mixed-size sediments in steep streams  
1041 considering macro-roughness, *Water Resources Research*, 51, 5260-5283,  
1042 doi:10.1002/2014wr016417, 2015.

- 1043 Shvidchenko, A. B., and Pender, G.: Flume study of the effect of relative depth on the  
1044 incipient motion of coarse uniform sediments, *Water Resources Research*, 36, 619-628,  
1045 doi:10.1029/1999wr900312, 2000.
- 1046 Sklar, L. S., Fadde, J., Venditti, J. G., Nelson, P., Wydzga, M. A., Cui, Y. T., and Dietrich, W.  
1047 E.: Translation and dispersion of sediment pulses in flume experiments simulating gravel  
1048 augmentation below dams, *Water Resources Research*, 45, doi:10.1029/2008wr007346, 2009.
- 1049 Stark, C. P., and Stark, G. J.: A channelization model of landscape evolution, *American*  
1050 *Journal of Science*, 301, 486-512, doi:10.2475/ajs.301.4-5.486, 2001.
- 1051 Strom, K. B., and Papanicolaou, A. N.: Occurrence of cluster microforms in mountain rivers,  
1052 *Earth Surface Processes and Landforms*, 34, 88-98, doi:10.1002/esp.1693, 2009.
- 1053 Turowski, J. M., Badoux, A., and Rickenmann, D.: Start and end of bedload transport in  
1054 gravel-bed streams, *Geophys. Res. Lett.*, 38, L04401, doi:10.1029/2010gl046558, 2011.
- 1055 Valyrakis, M., Diplas, P., Dancey, C. L., Greer, K., and Celik, A. O.: Role of instantaneous  
1056 force magnitude and duration on particle entrainment, *J. Geophys. Res.-Earth Surf.*, 115,  
1057 doi:10.1029/2008jf001247, 2010.
- 1058 Venditti, J. G., Dietrich, W. E., Nelson, P. A., Wydzga, M. A., Fadde, J., and Sklar, L.:  
1059 Mobilization of coarse surface layers in gravel-bedded rivers by finer gravel bed load, *Water*  
1060 *Resour. Res.*, 46, doi:10.1029/2009wr008329, 2010.
- 1061 Wilcock, P. R., and Crowe, J. C.: Surface-based transport model for mixed-size sediment,  
1062 *Journal of Hydraulic Engineering-Asce*, 129, 120-128, doi:10.1061/(asce)0733-  
1063 9429(2003)129:2(120), 2003.
- 1064 Wong, M., and Parker, G.: Reanalysis and Correction of Bed-Load Relation of Meyer-Peter  
1065 and Müller Using Their Own Database, *Journal of Hydraulic Engineering*, 132, 1159-1168,  
1066 doi:doi:10.1061/(ASCE)0733-9429(2006)132:11(1159), 2006.
- 1067 Yager, E. M., Dietrich, W. E., Kirchner, J. W., and McArdell, B. W.: Prediction of sediment  
1068 transport in step-pool channels, *Water Resources Research*, 48, doi:10.1029/2011wr010829,  
1069 2012a.
- 1070 Yager, E. M., Turowski, J. M., Rickenmann, D., and McArdell, B. W.: Sediment supply,  
1071 grain protrusion, and bedload transport in mountain streams, *Geophys. Res. Lett.*, 39,  
1072 doi:10.1029/2012gl051654, 2012b.
- 1073 Yanites, B. J., and Tucker, G. E.: Controls and limits on bedrock channel geometry, *J.*  
1074 *Geophys. Res.-Earth Surf.*, 115, 17, doi:10.1029/2009jf001601, 2010.
- 1075

Table 1. Best-fit threshold evolution models

| Model type                                          |                                      | Best-fit coefficients |                                     |                                      | $R^2$                             |       |
|-----------------------------------------------------|--------------------------------------|-----------------------|-------------------------------------|--------------------------------------|-----------------------------------|-------|
|                                                     |                                      | $C_1$                 | $C_2$                               | $C_3$                                |                                   |       |
| "Sand fraction" $F_j < 2.8$ mm, collective best fit |                                      | Eq. 14                | 0.097<br>(0.057, 0.14) <sup>a</sup> | 0.103<br>(-0.009, 0.22) <sup>a</sup> | 5.47<br>(-16.8, 5.8) <sup>a</sup> | 0.13  |
| Units                                               |                                      |                       | $k$                                 | $K_{dep}$                            | $K_{ent}$                         | $R^2$ |
|                                                     |                                      |                       | 1/s                                 | 1                                    | 1                                 |       |
| $\partial\theta_s/\partial x$ model, collective fit | Eq. 7, $A_r=1$                       |                       | 2.83E-03                            | 0.2                                  | 0.4                               | 0.69  |
| $\partial\theta_s/\partial x$ model, Expt 1 fit     | Eq. 7, $A_r=1$                       |                       | 4.12E-02                            | 0.55                                 | 0.61                              | 0.52  |
| $\partial\theta_s/\partial x$ model, Expt 2 fit     | Eq. 7, $A_r=1$                       |                       | 4.80E-02                            | 0.55                                 | 0.73                              | 0.73  |
| $\partial\theta_s/\partial x$ model, Expt 3 fit     | Eq. 7, $A_r=1$                       |                       | 2.83E-03                            | 0.22                                 | 0.41                              | 0.77  |
| $\partial\theta_s/\partial x$ model, Expt 4 fit     | Eq. 7, $A_r=1$                       |                       | 2.75E-02                            | 0.43                                 | 0.62                              | 0.75  |
| $\partial q_s/\partial x$ model, collective fit     | Eq. 5                                |                       | 9.83E-03 <sup>b</sup>               | 0.25                                 | 0.4                               | 0.69  |
| $\partial\theta_s/\partial x$ model, collective fit | Eq. 7, $A_r=D_{50}/\sigma$           |                       | 4.17E-03                            | 0.24                                 | 0.43                              | 0.69  |
| $\partial\theta_s/\partial x$ model, collective fit | Eq. 7, $A_r=D_{50}/D_{84}$           |                       | 4.83E-03                            | 0.23                                 | 0.41                              | 0.69  |
| $\partial\theta_s/\partial x$ model, collective fit | Eq. 7, $A_r=2D_{50}/(D_{84}-D_{16})$ |                       | 3.83E-03                            | 0.23                                 | 0.42                              | 0.69  |

<sup>a</sup>Confidence intervals are +-95%, based on nonlinear multiple regression in Matlab

<sup>b</sup>Units on k for Eq. 5 vary with kent and kdep

Table 2. Morphodynamic Model Parameters

Constant independent variables:

|                 |      | Units    |
|-----------------|------|----------|
| $q_w$           | 1.00 | $m^2/s$  |
| D               | 50   | mm       |
| f               | 0.1  |          |
| h               | 0.50 | m        |
| U               | 1.99 | m/s      |
| $\lambda_p$     | 0.25 |          |
| $\kappa_{dep}$  | 0.2  |          |
| $\kappa_{ent}$  | 0.4  |          |
| $\tau_{cmin}^*$ | 0.02 |          |
| $\tau_{cmax}^*$ | 0.35 |          |
| $\rho$          | 1000 | $kg/m^3$ |
| $\rho_s$        | 2600 | $kg/m^3$ |
| Total duration  | 0.5  | years    |
| # nodes         | 12   |          |
| node spacing    | 100  | m        |
| $U_{bedload}/U$ | 0.5  |          |

Initial condition:

|                        |          | Units   |
|------------------------|----------|---------|
| $q_{sfeed, init}$      | 1.00E-03 | $m^2/s$ |
| S, init                | 0.0147   |         |
| $\tau_{c(qs), init}^*$ | 0.06     |         |

Variables changed:

|             |                        | Units   |
|-------------|------------------------|---------|
| $q_{sfeed}$ | 1E-5 to 1E-1           | $m^2/s$ |
| k           | 2.8E-6, 5.7E-6, 2.8E-5 | 1/s     |



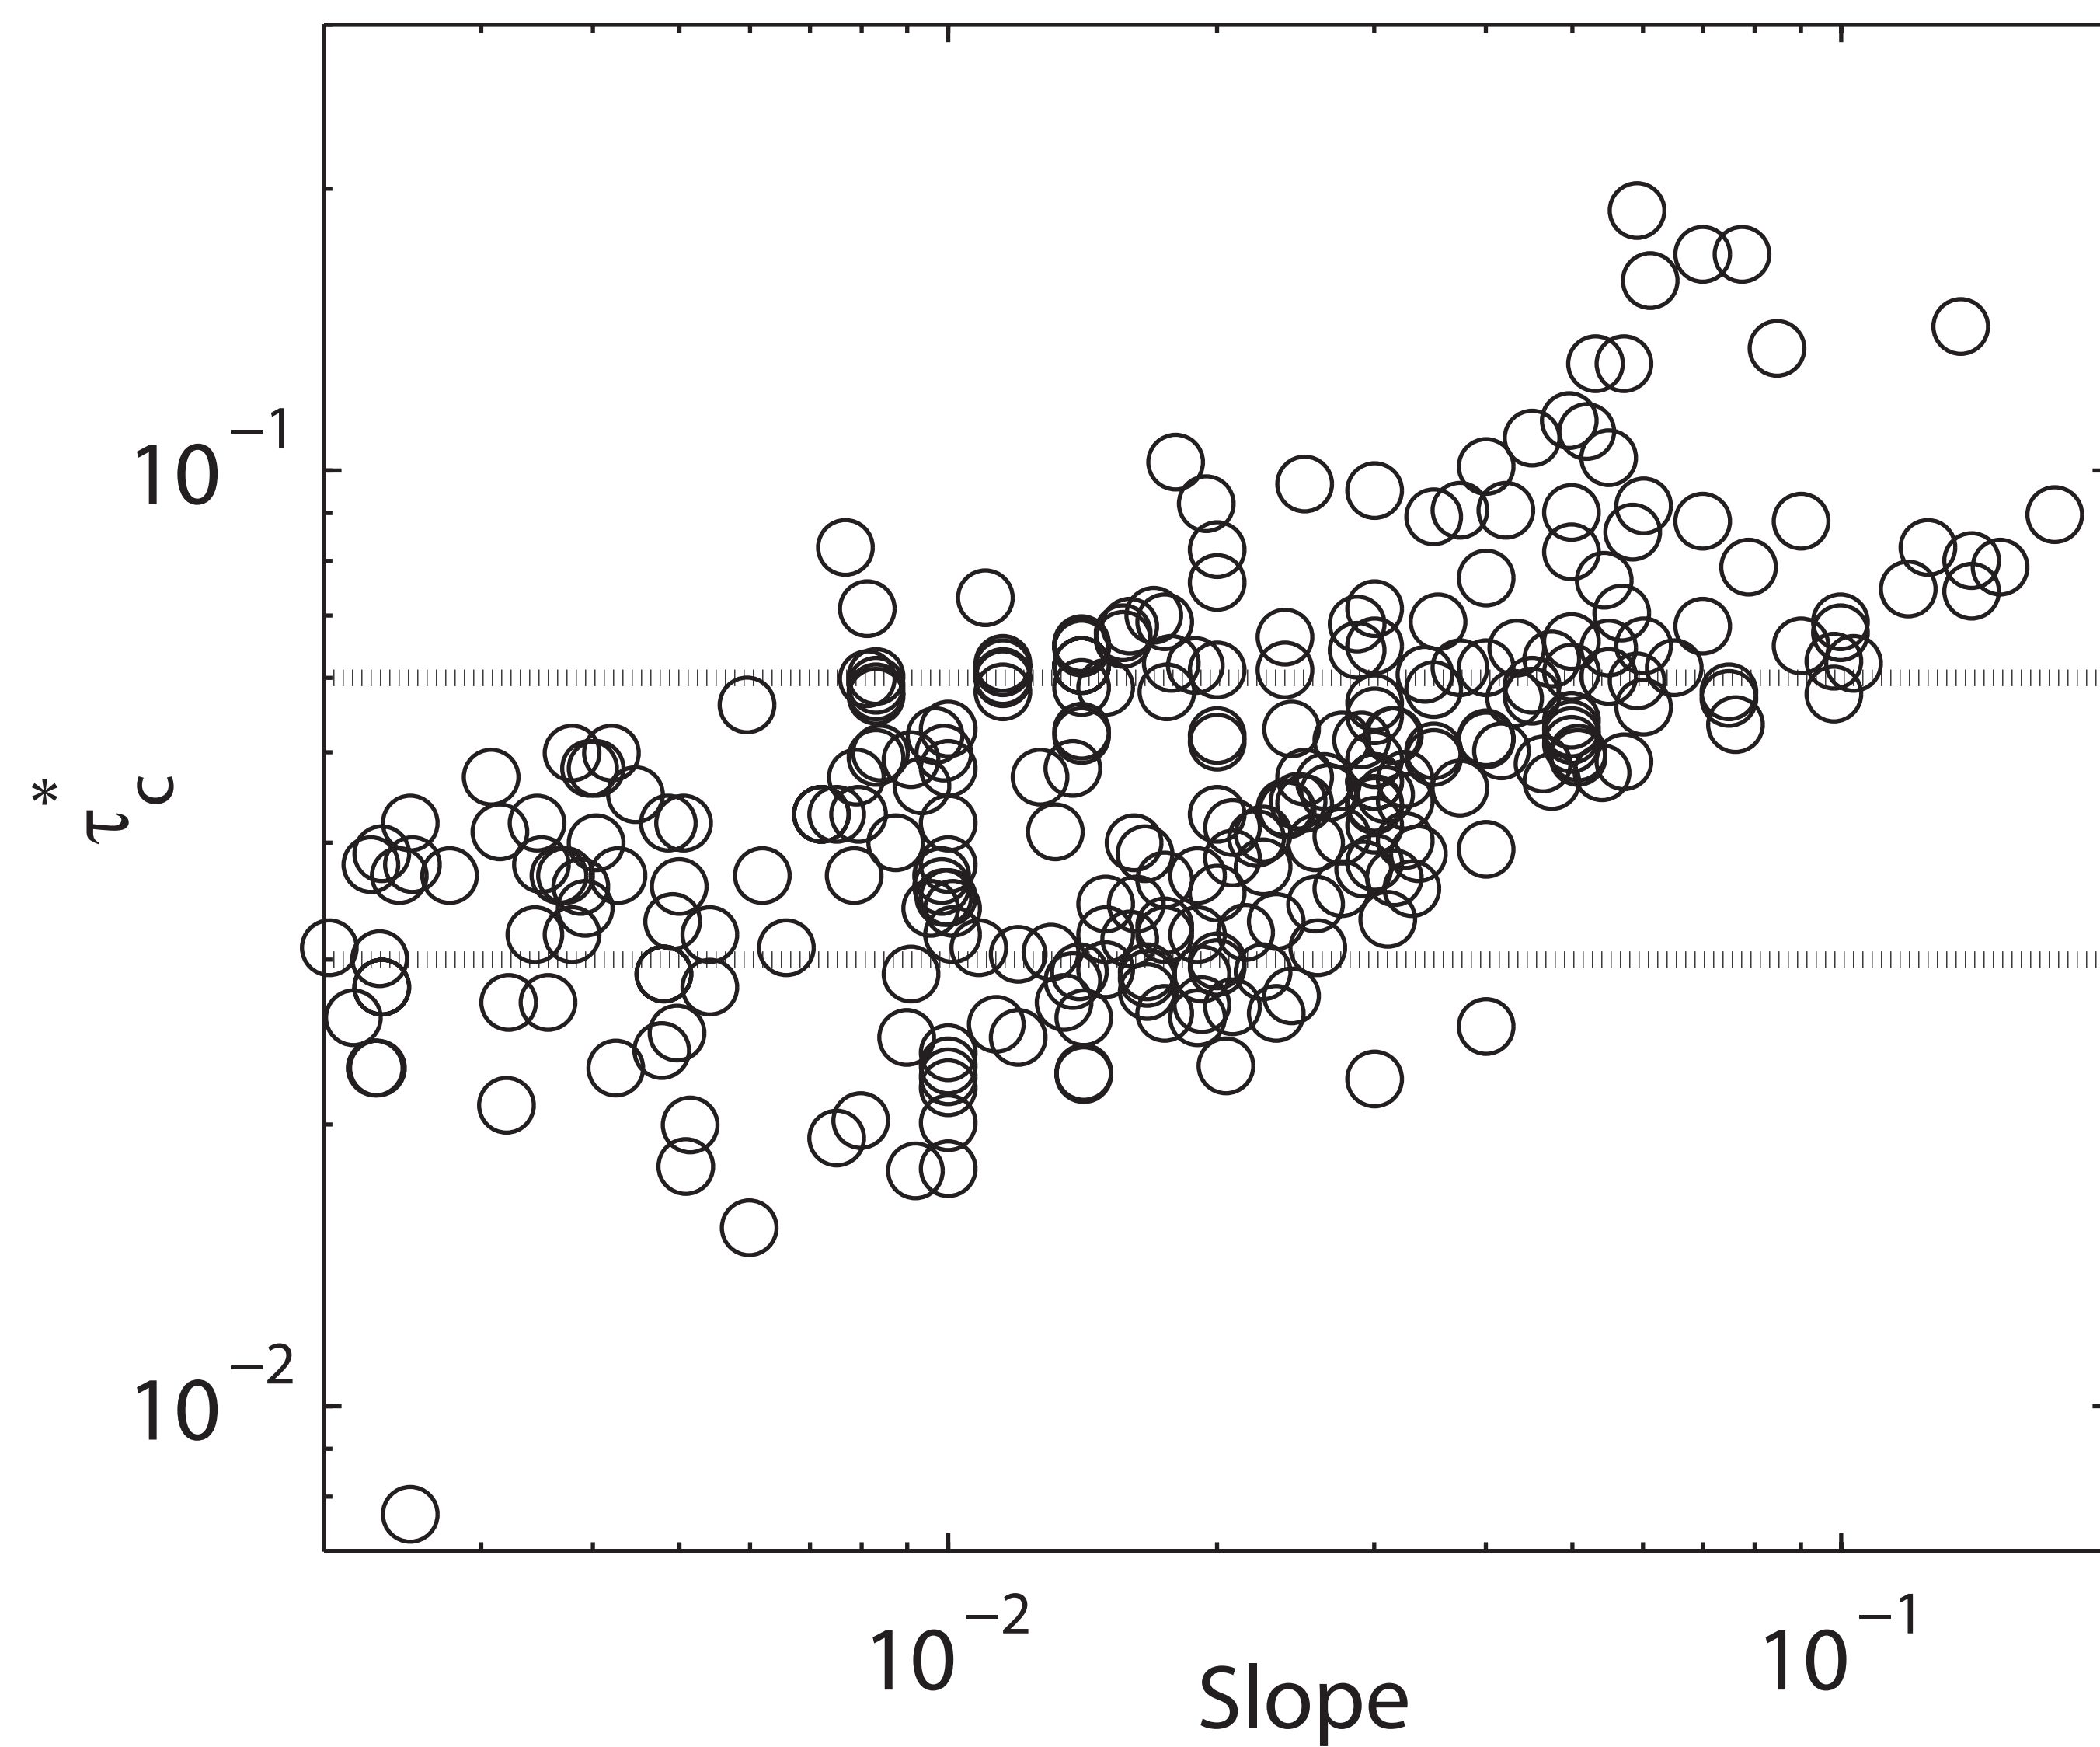

Figure 1. Threshold of motion data from both field and experimental studies. A power law regression to these data gives  $R^2=0.34$ , indicating that a majority of the variability is not explained by slope alone. Dotted lines indicate common range of 0.03 to 0.06 often assumed for modeling transport, although measured data fall well out of this range. Data have been additionally filtered to only include  $D_{50} > 2$  mm (i.e. gravel) and slopes between 0.002 and 0.2. Data were compiled and provided by Prancevic and Lamb (2015), based in part on Buffington and Montgomery (1997), with additional data from Olinde (2015) and Lenzi et al. (2006).

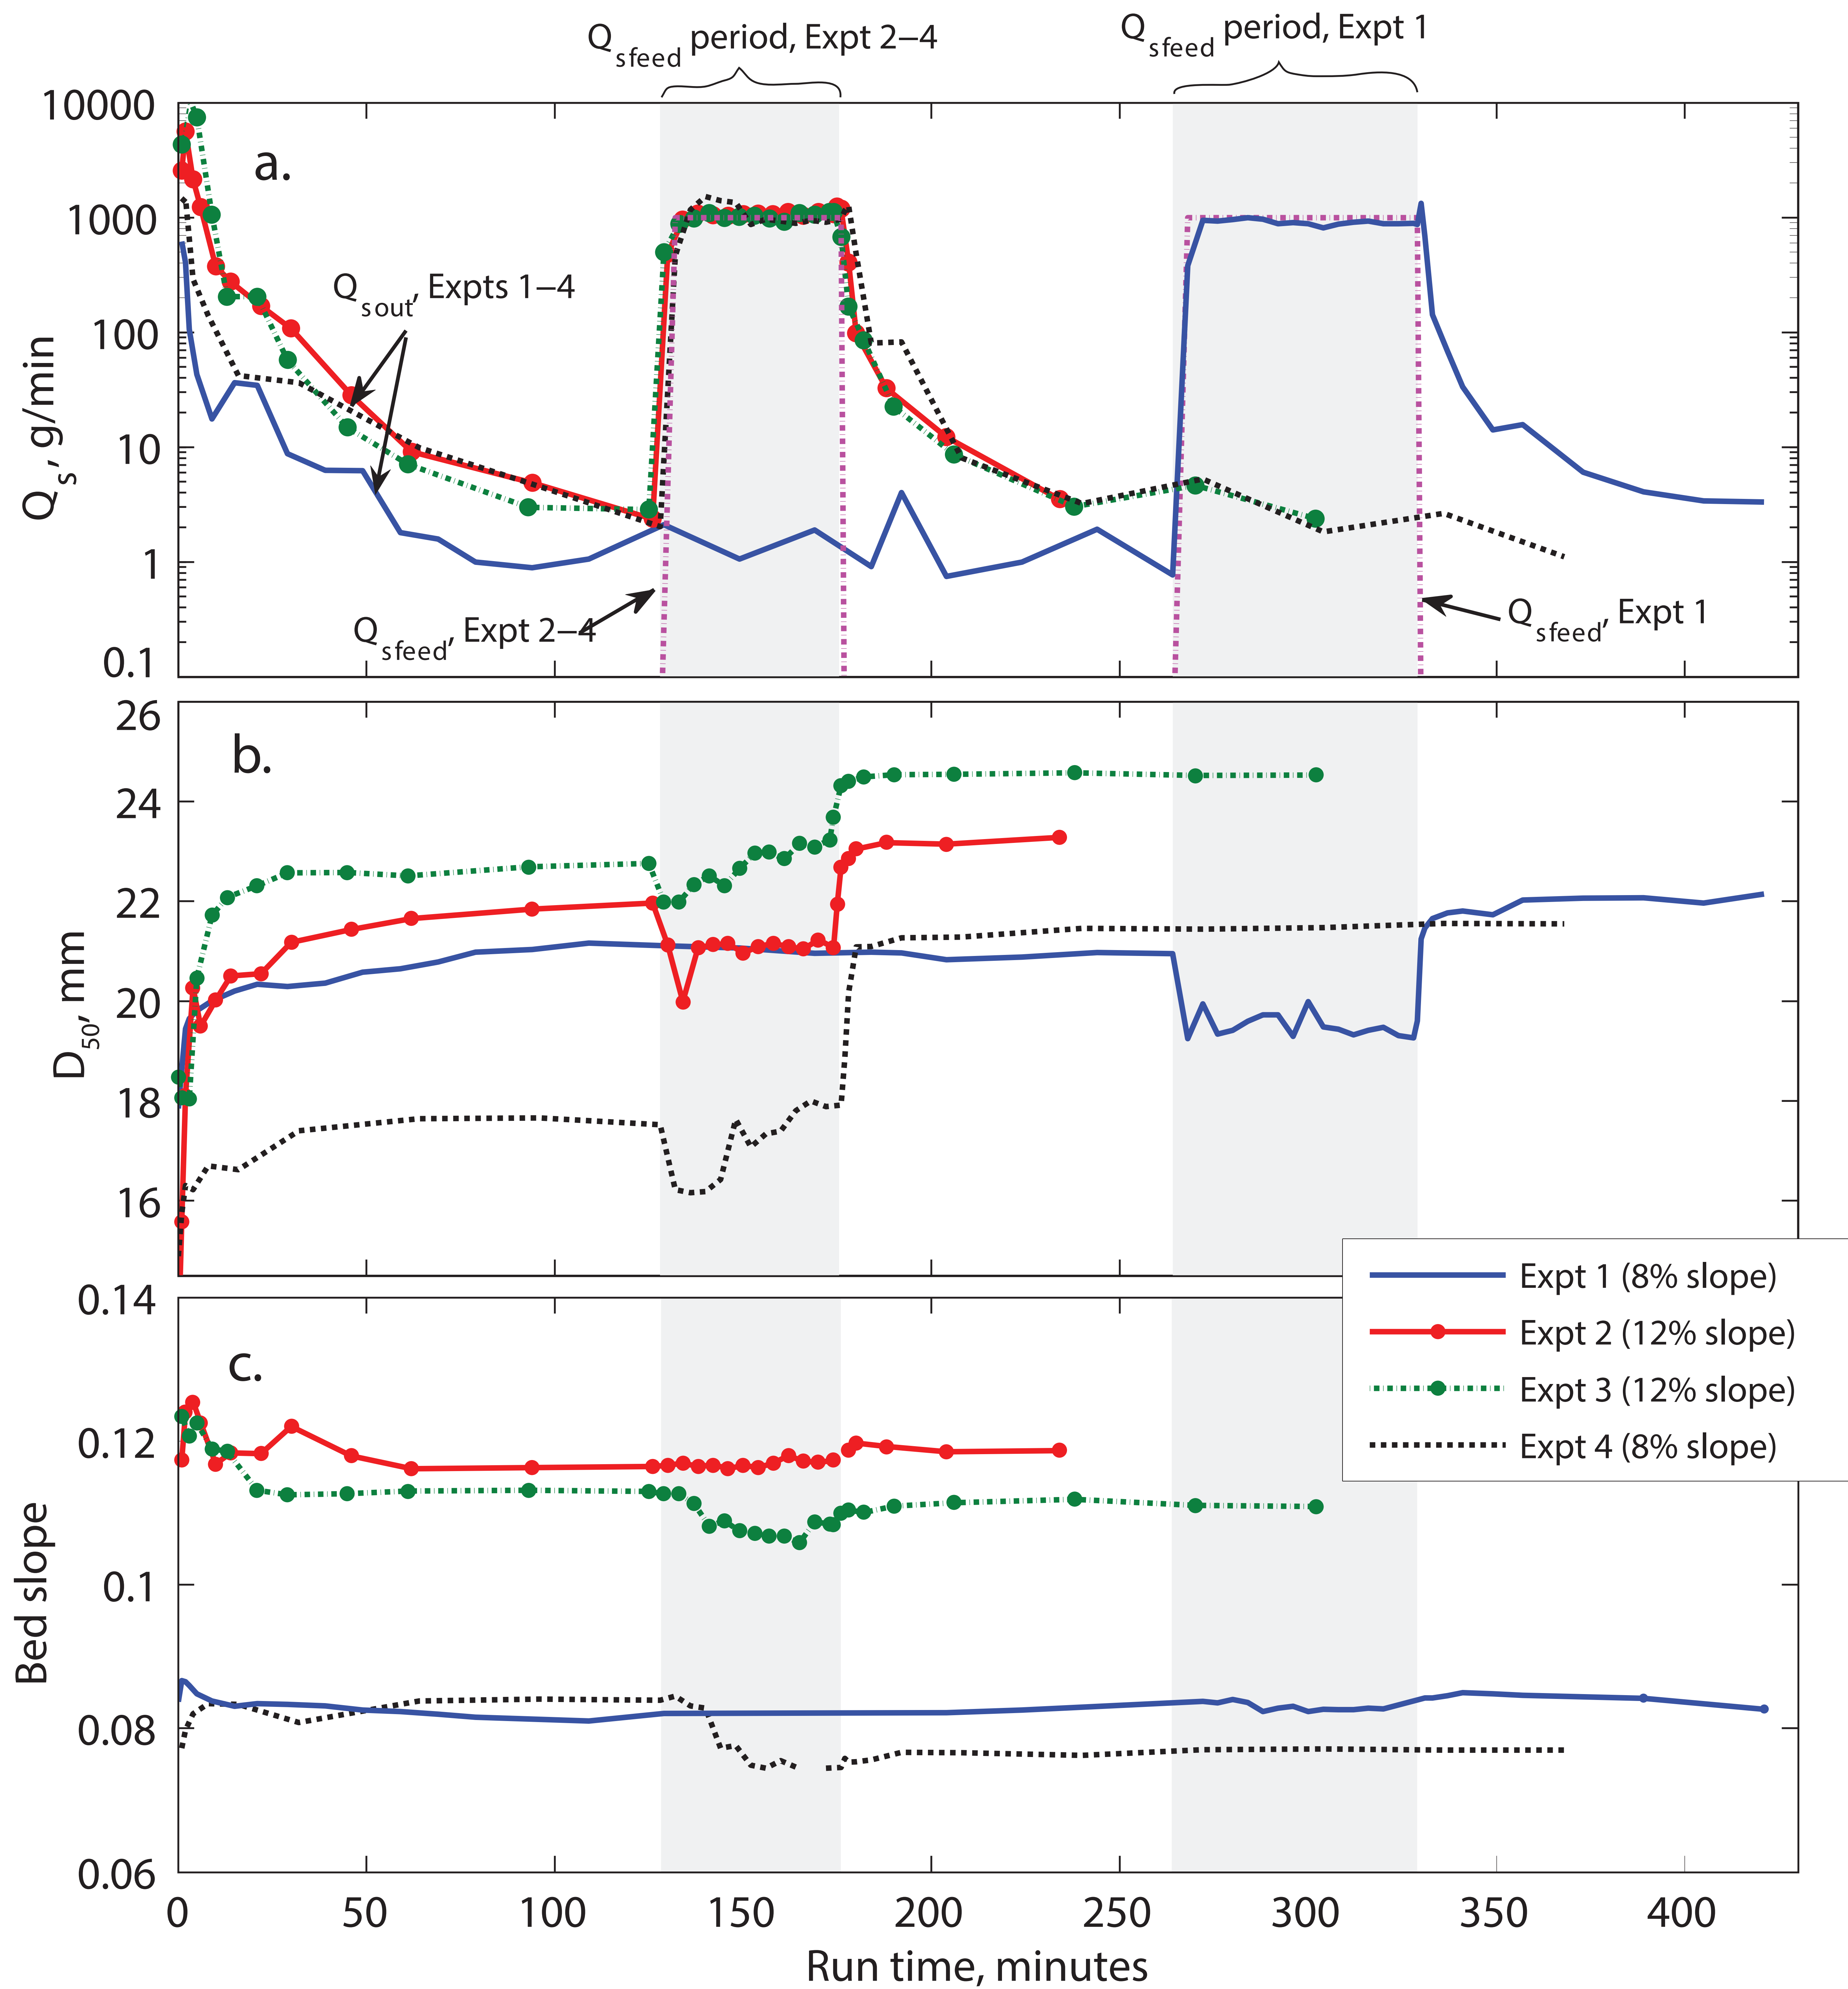

Figure 2. Flume experiment data (Johnson et al., 2015). a. Sediment transport rate in ( $Q_{sfeed}$ ) and out of the flume. The upstream sediment supply rate was zero other than during the  $Q_{sfeed}$  period. Experiment 1 was run for a longer duration than the others but shows similar trends. Note that the outlet  $Q_s$  adjusts much faster to match the increase in supply than it does to decrease during periods of no input. b. Median bed surface grain diameters decreased during the feed of finer gravel, and then increase beyond their previous stable bed. c. Flume-averaged bed slopes changed relatively little even as transport rates and  $D_{50}$  changed greatly in response to initial bed stabilizing and supply perturbations.



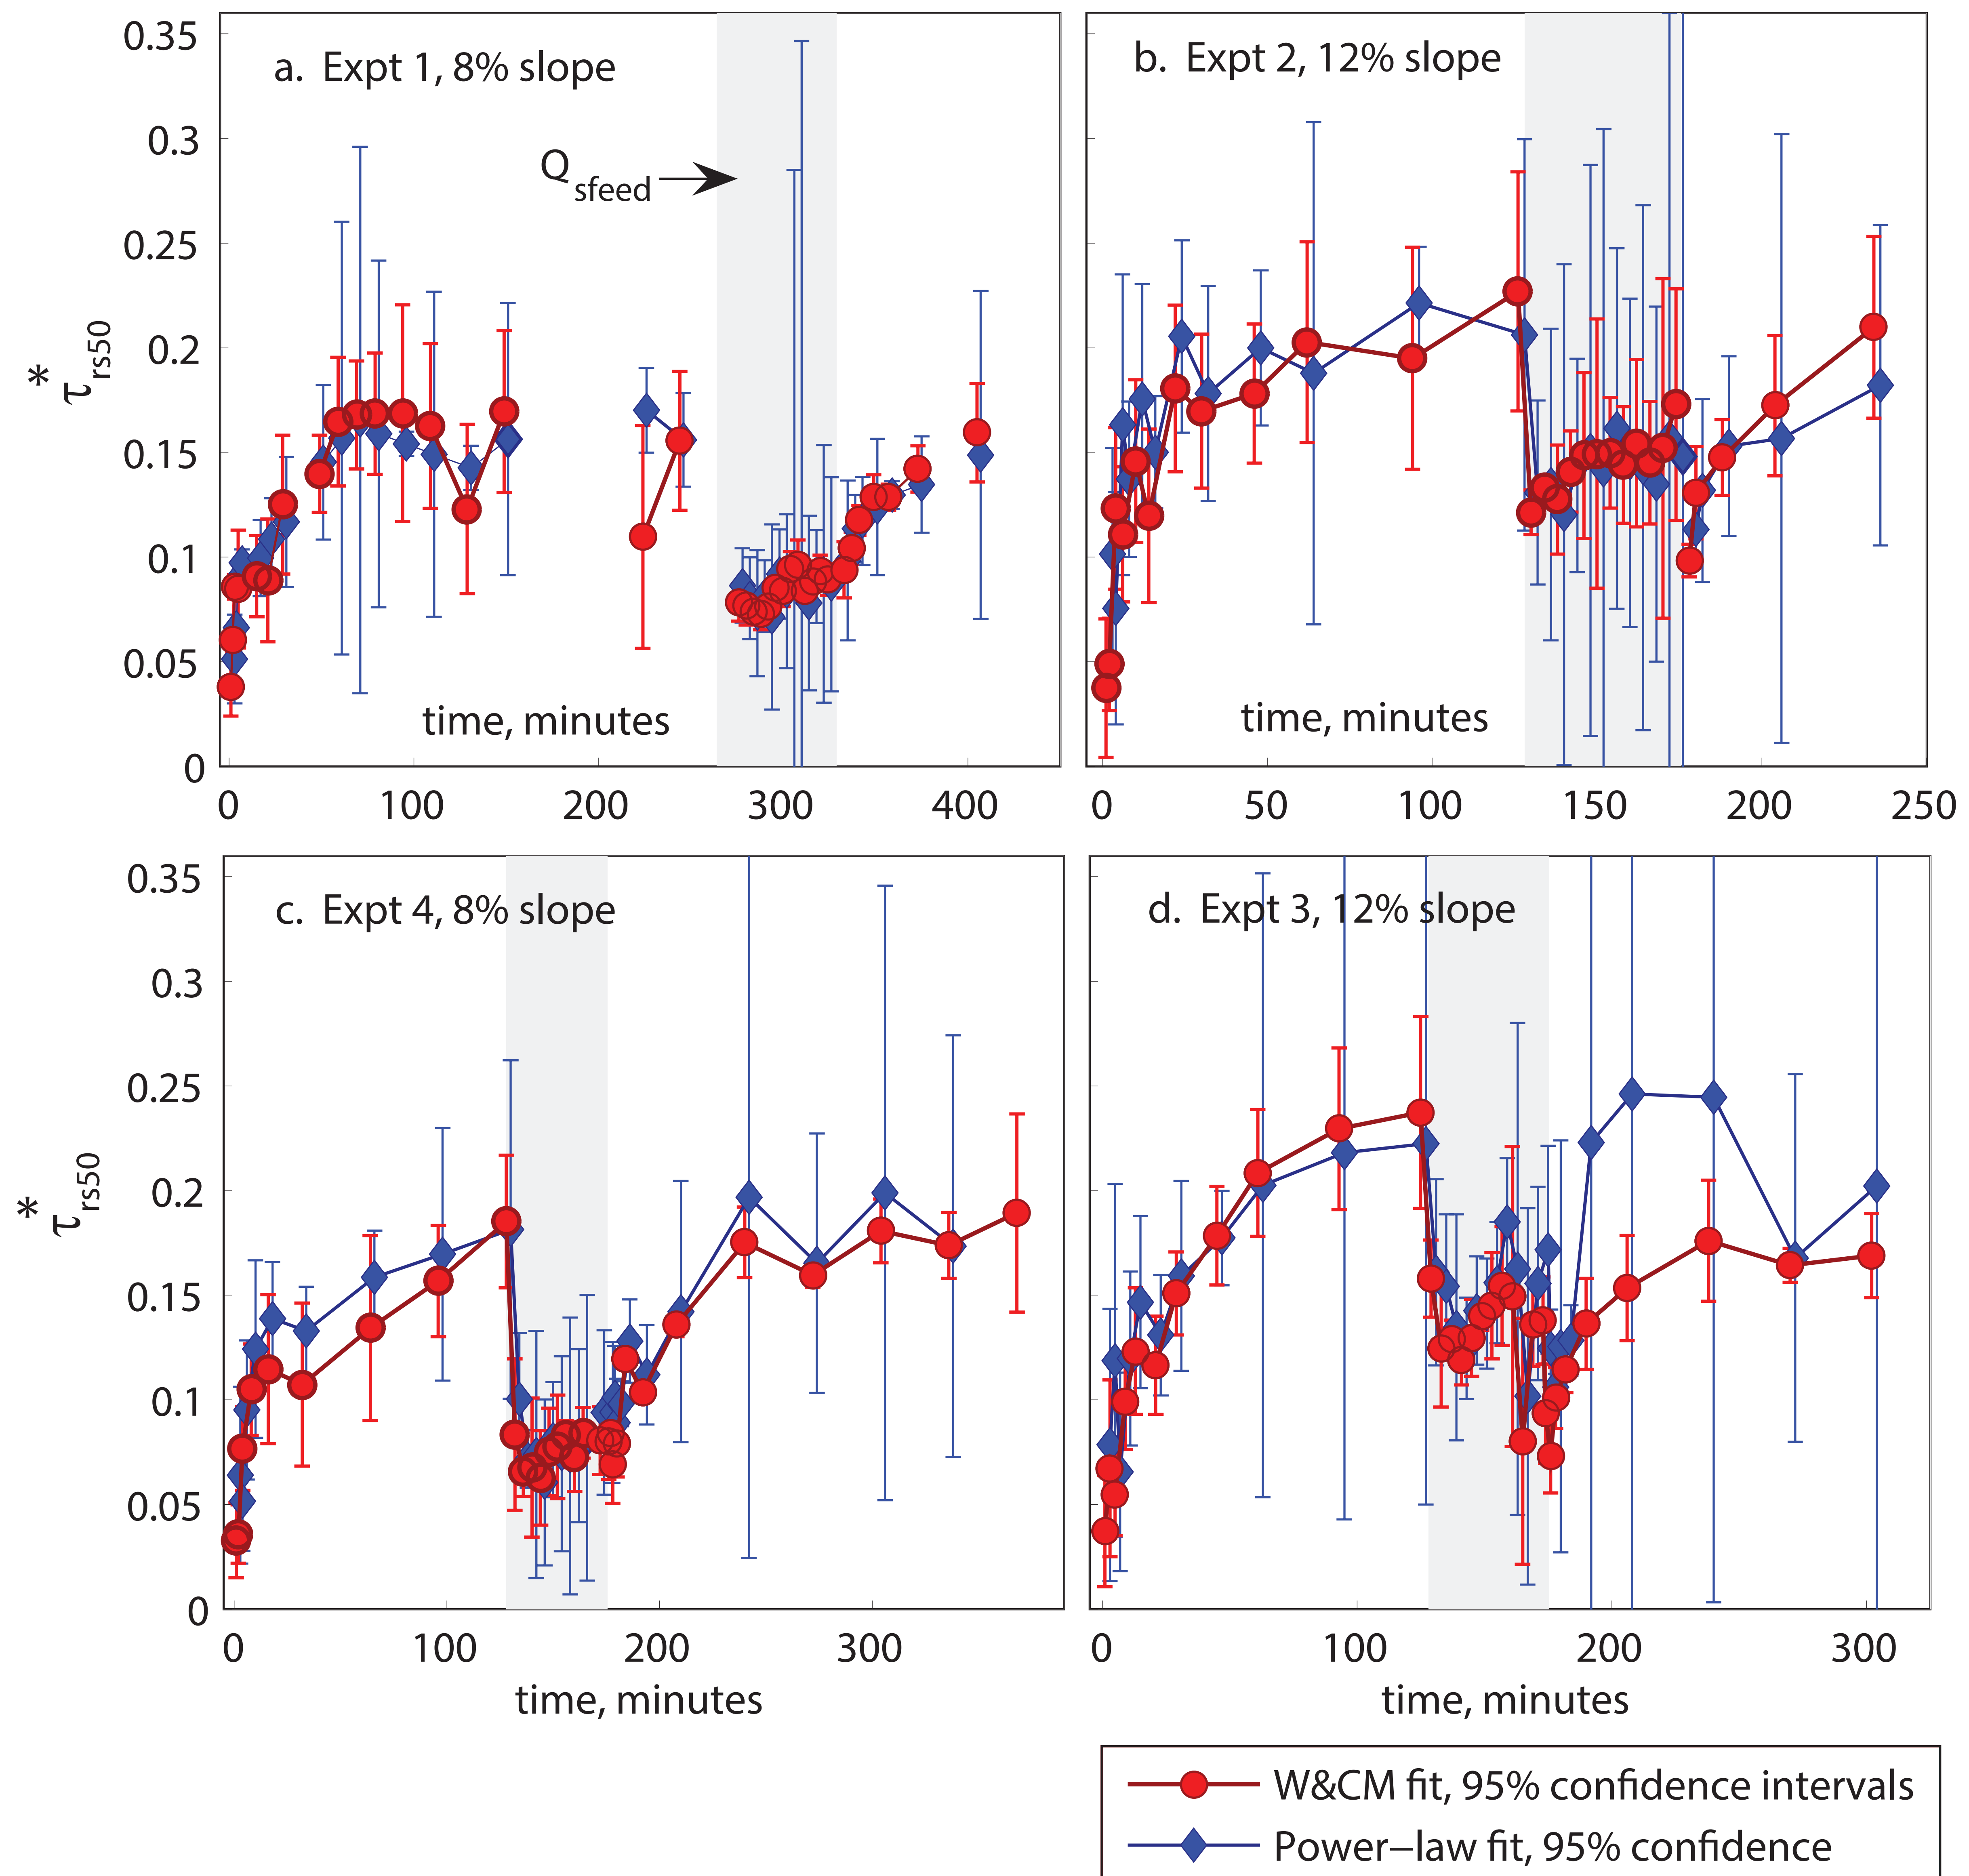

Figure 3. Fits to the experimental data with the W&CM. , “W&CM fit“ uses Eq. (16) to calculate hiding function exponent  $b$ , while “Power-law fit“ calculates a best-fit  $b$  along with the threshold parameter. Error bars give 95% confidence intervals based on the regressions; although uncertainty can be broad the trends are clear and consistent. Shaded area indicates times of fine gravel addition (sediment feed) in each experiment.

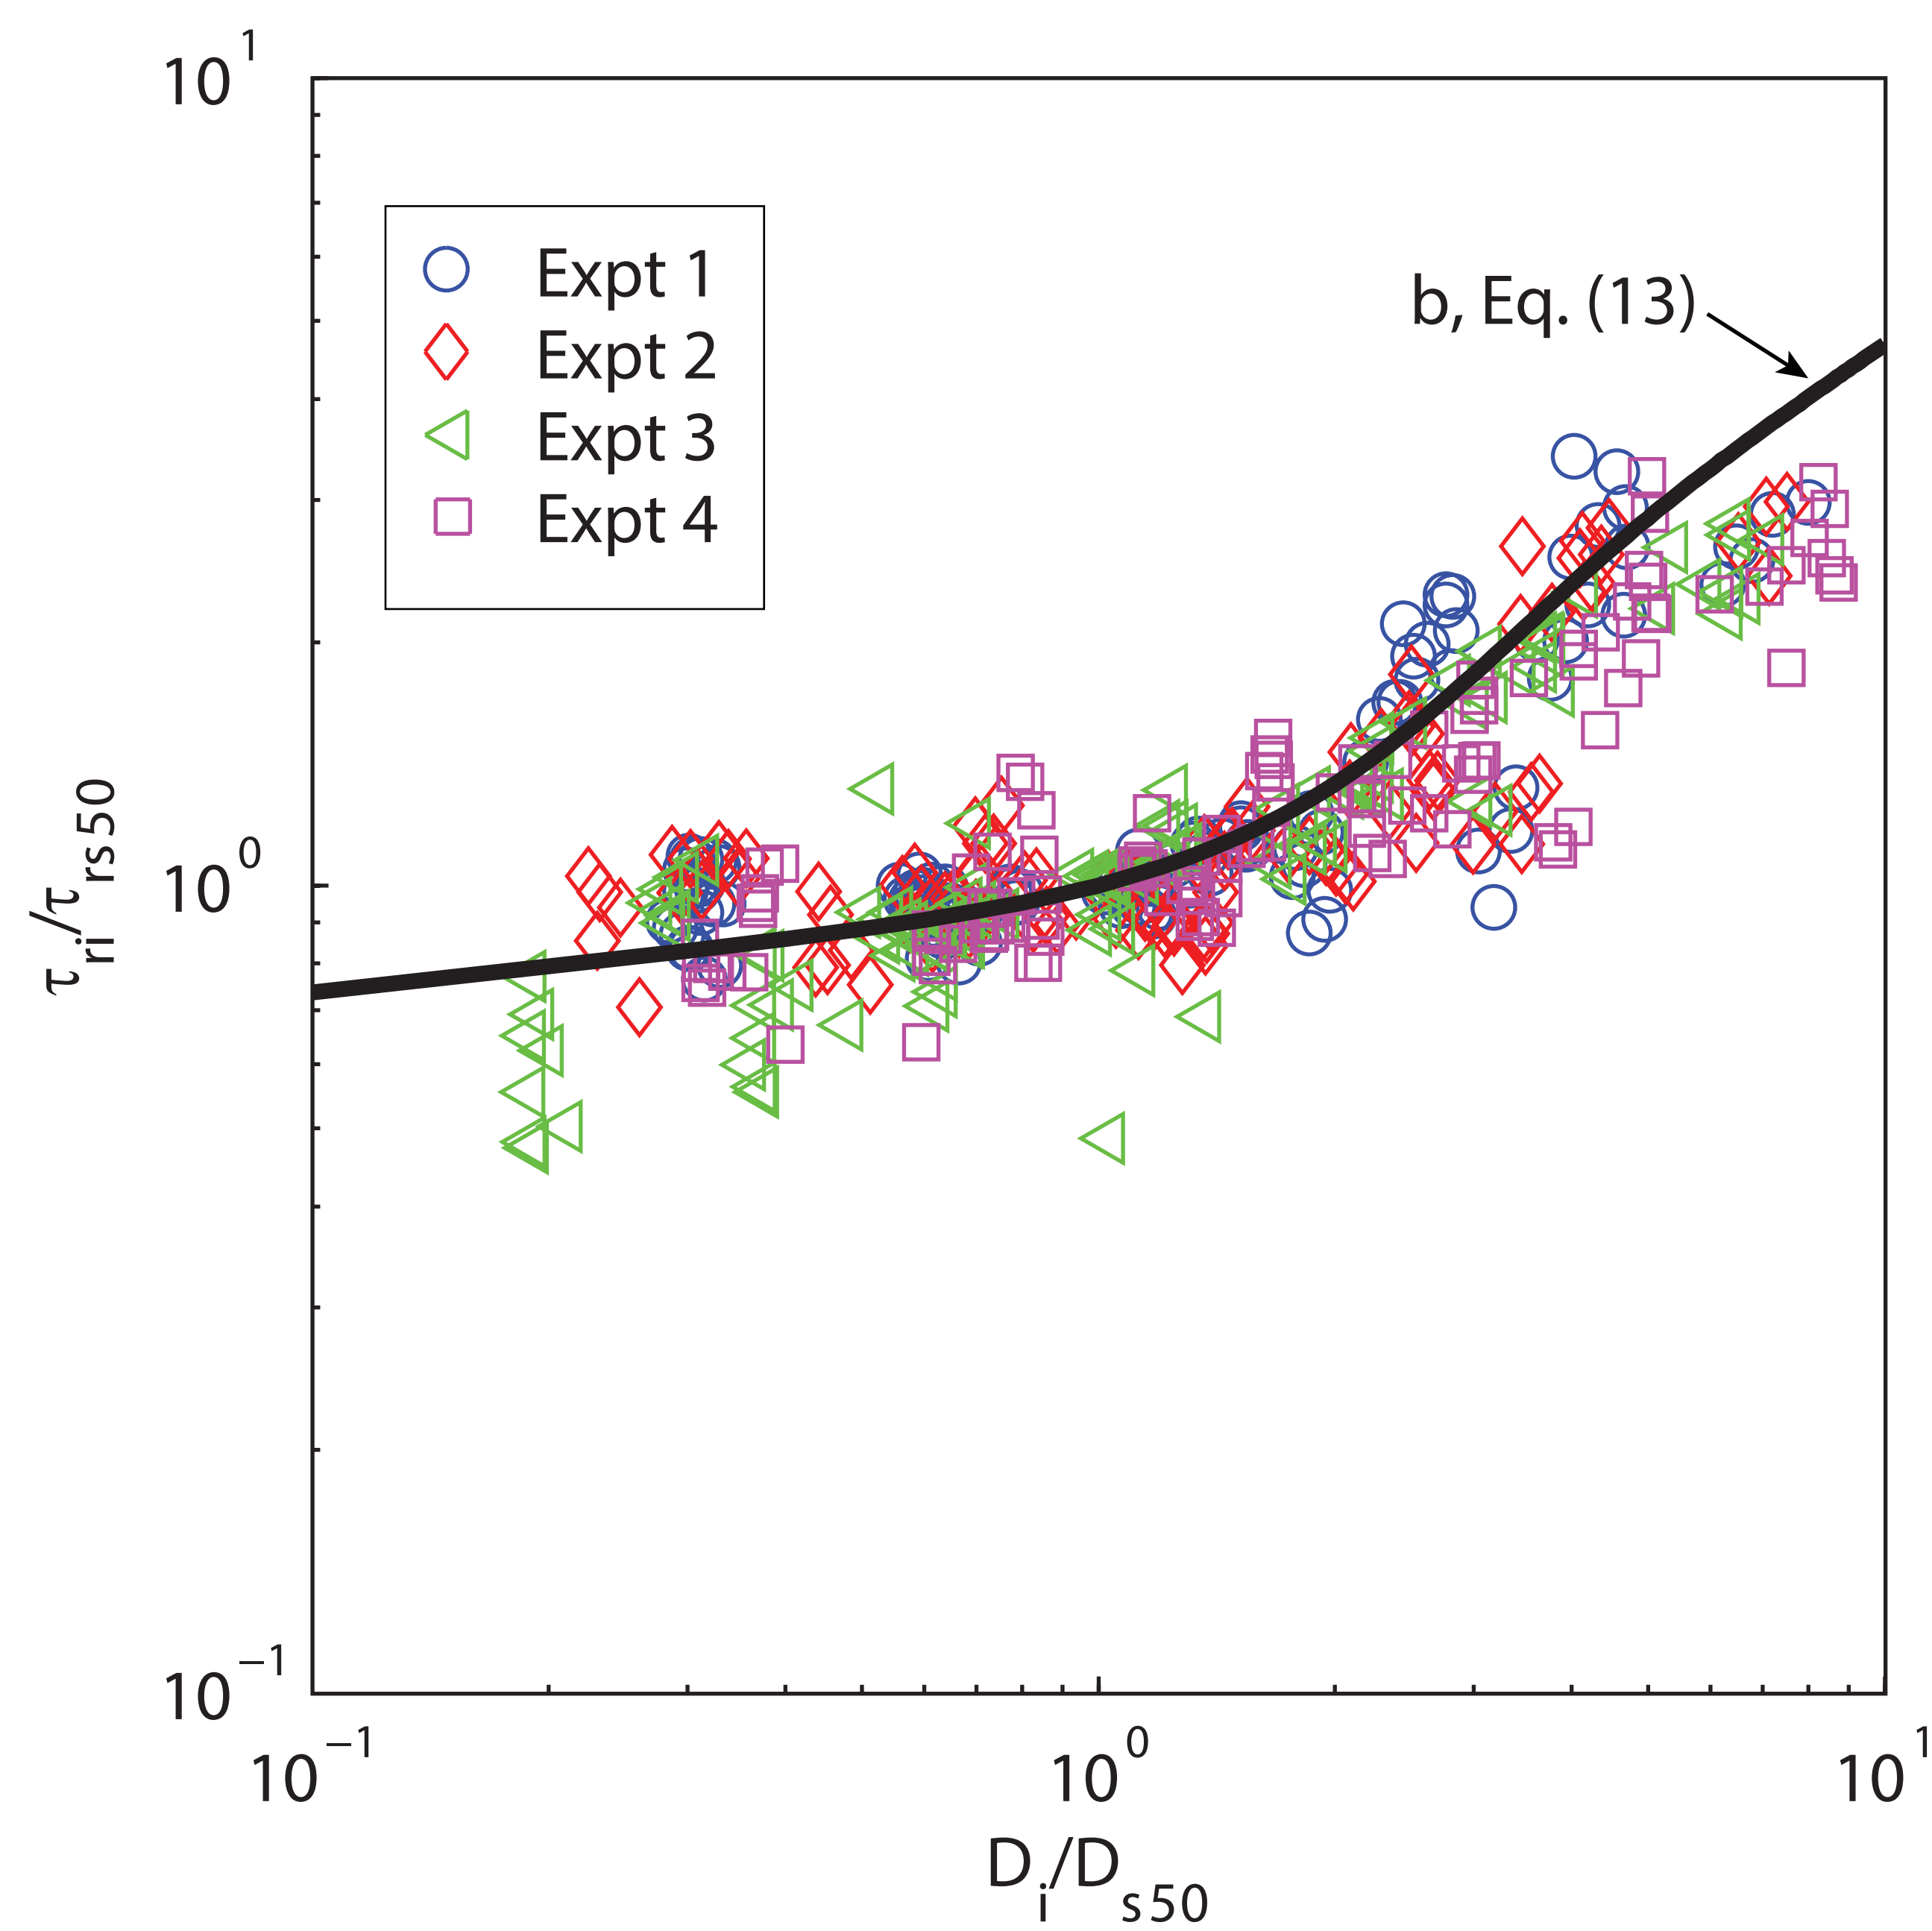

Figure 4. Data points are based on the “Power-law” fits for exponent  $b$ . The W&CM hiding function (Eq. 16) does a good job matching the data, although it was not fit to these points. The first 6 measurements of each experiment (roughly the first 10 minutes) were excluded because of large scatter associated with the greatest bed instability. The axes reflect the left and right hand sides of Eq. (15), but uses dimensional stresses to be consistent with plots shown in Wilcock and Crowe (2003).



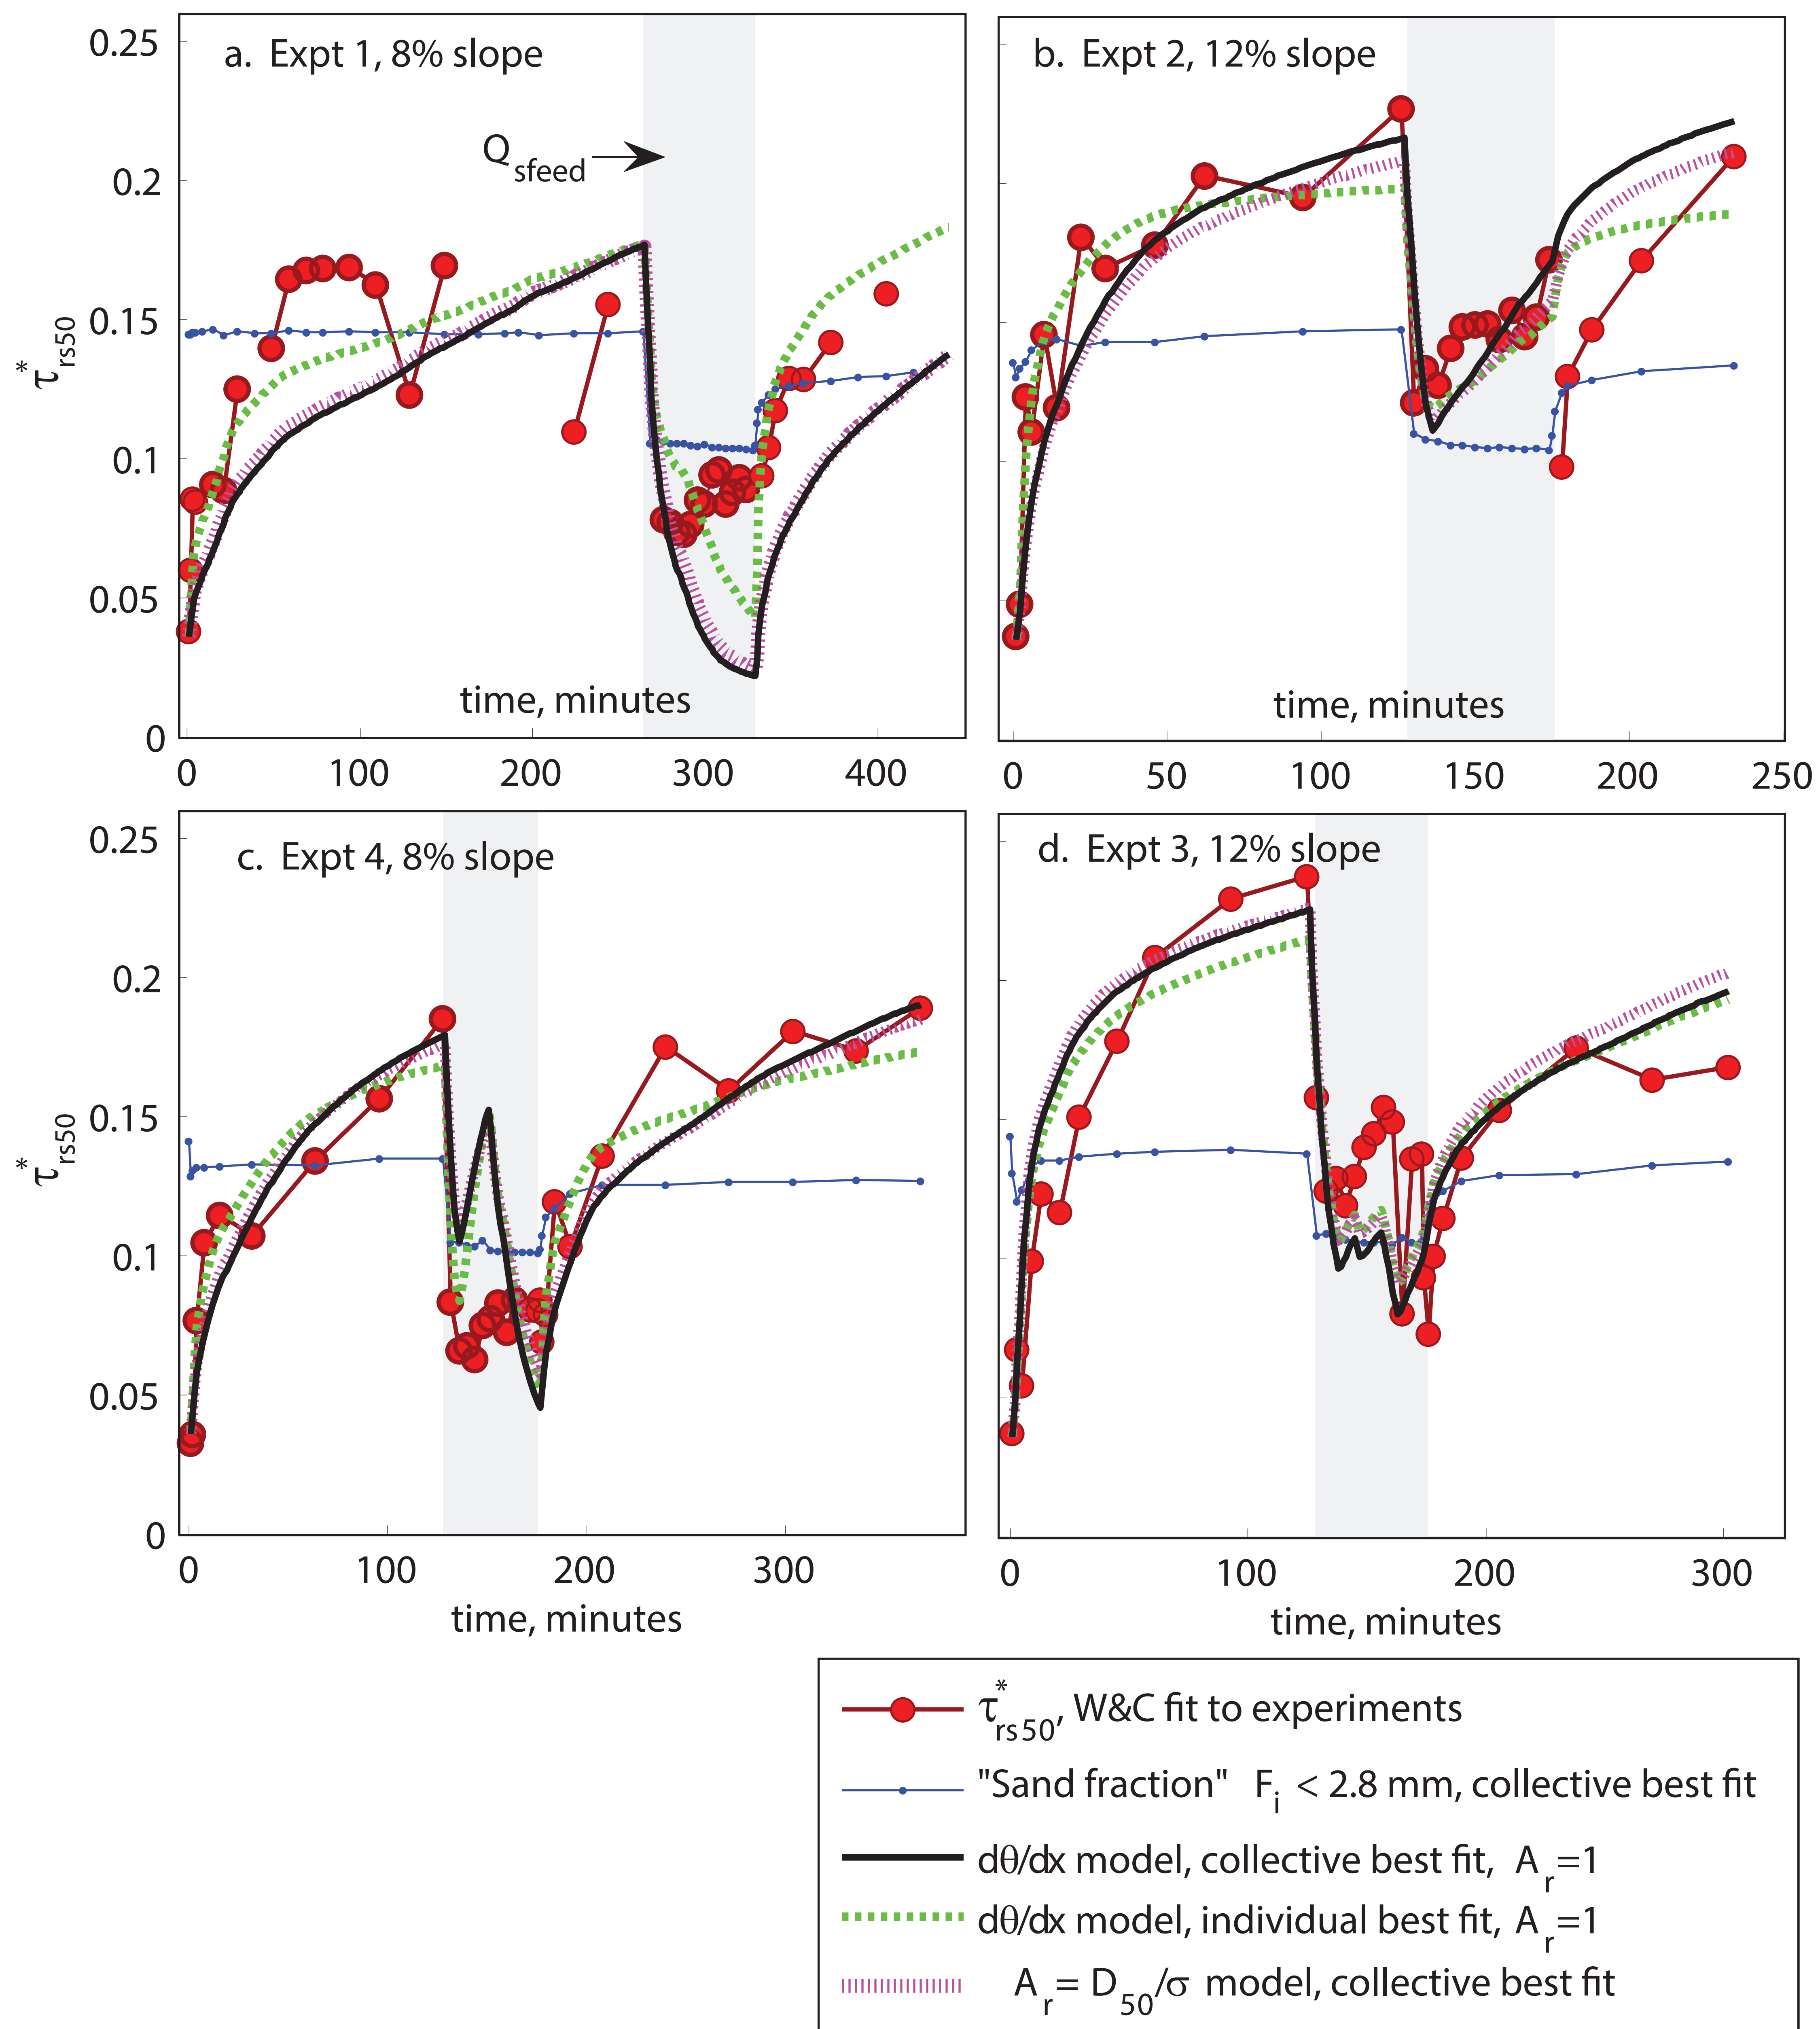

Figure 5. Best-fit models (Eq. 4, 8 and 10) compared to experimental constraints. The periods of upstream sediment supply ( $Q_{sfeed}$ ) are indicated by the grey boxes for each experiment.

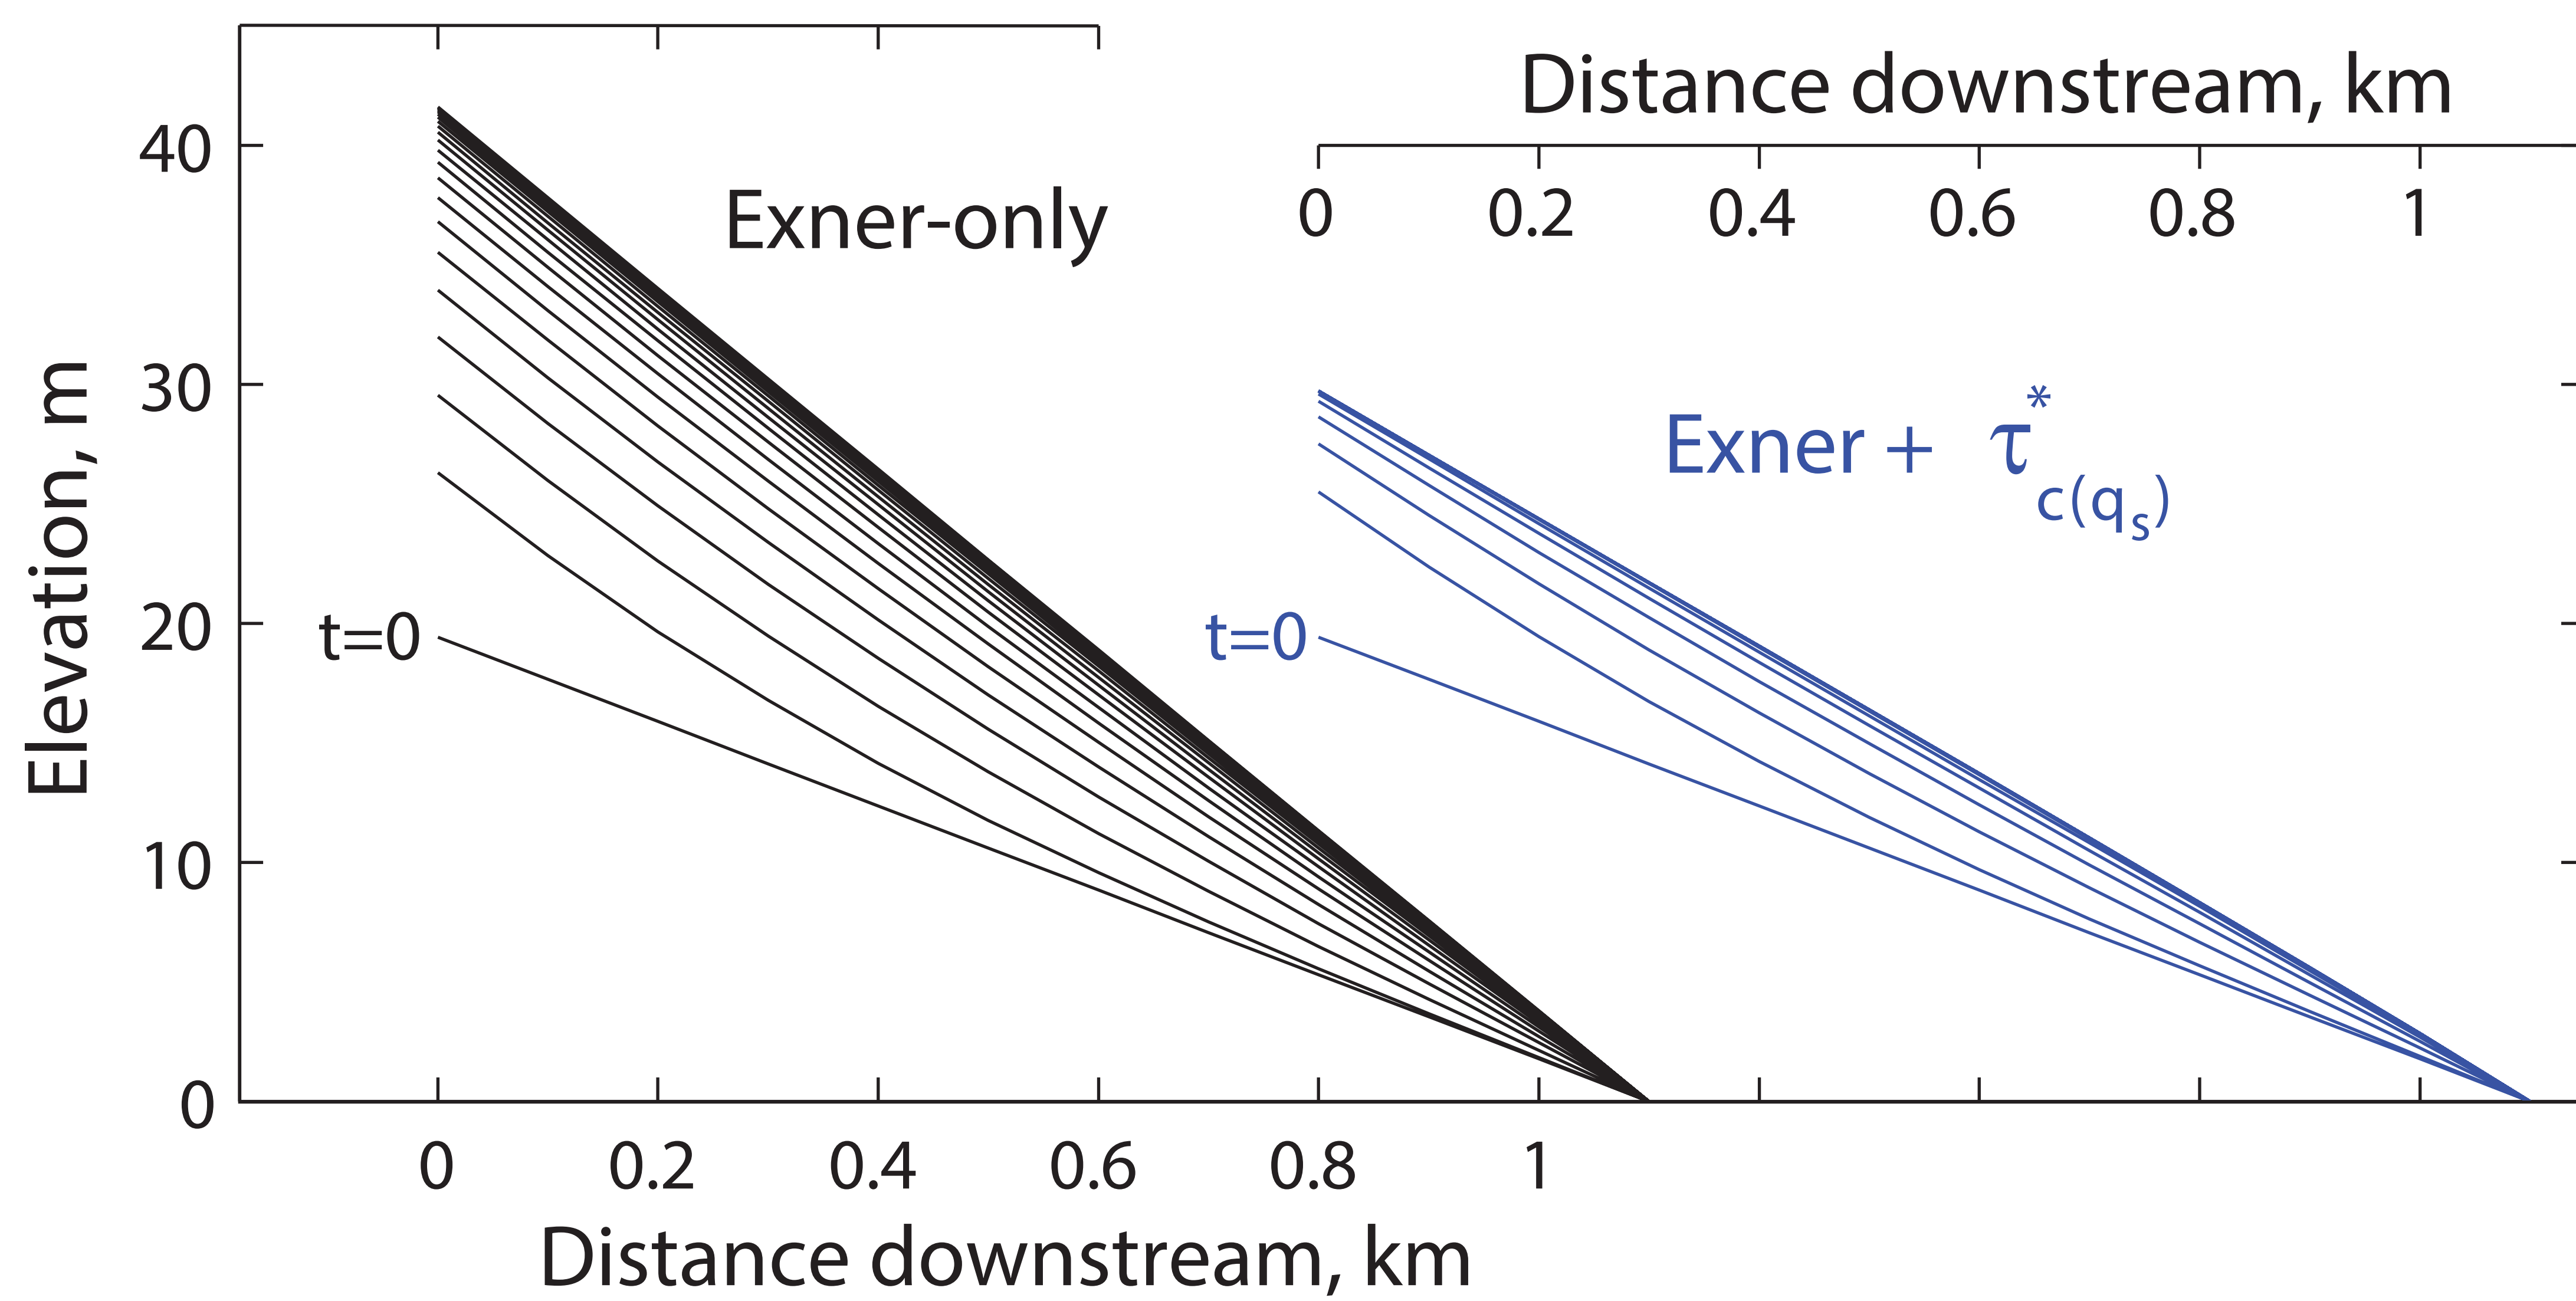

Figure 6. Profile evolution, comparing the morphodynamic responses of models with and without threshold evolution. The initial condition is an equilibrium channel with  $\tau_c^*=0.06$ , upstream sediment supply  $q_s=1e-3 \text{ m}^2/\text{s}$ , and an initial equilibrium slope of 0.0147. Sediment supply is increased 5x at  $t=0$ . Lines are each 5 model days apart, and indicate the evolution to a new transport equilibrium.



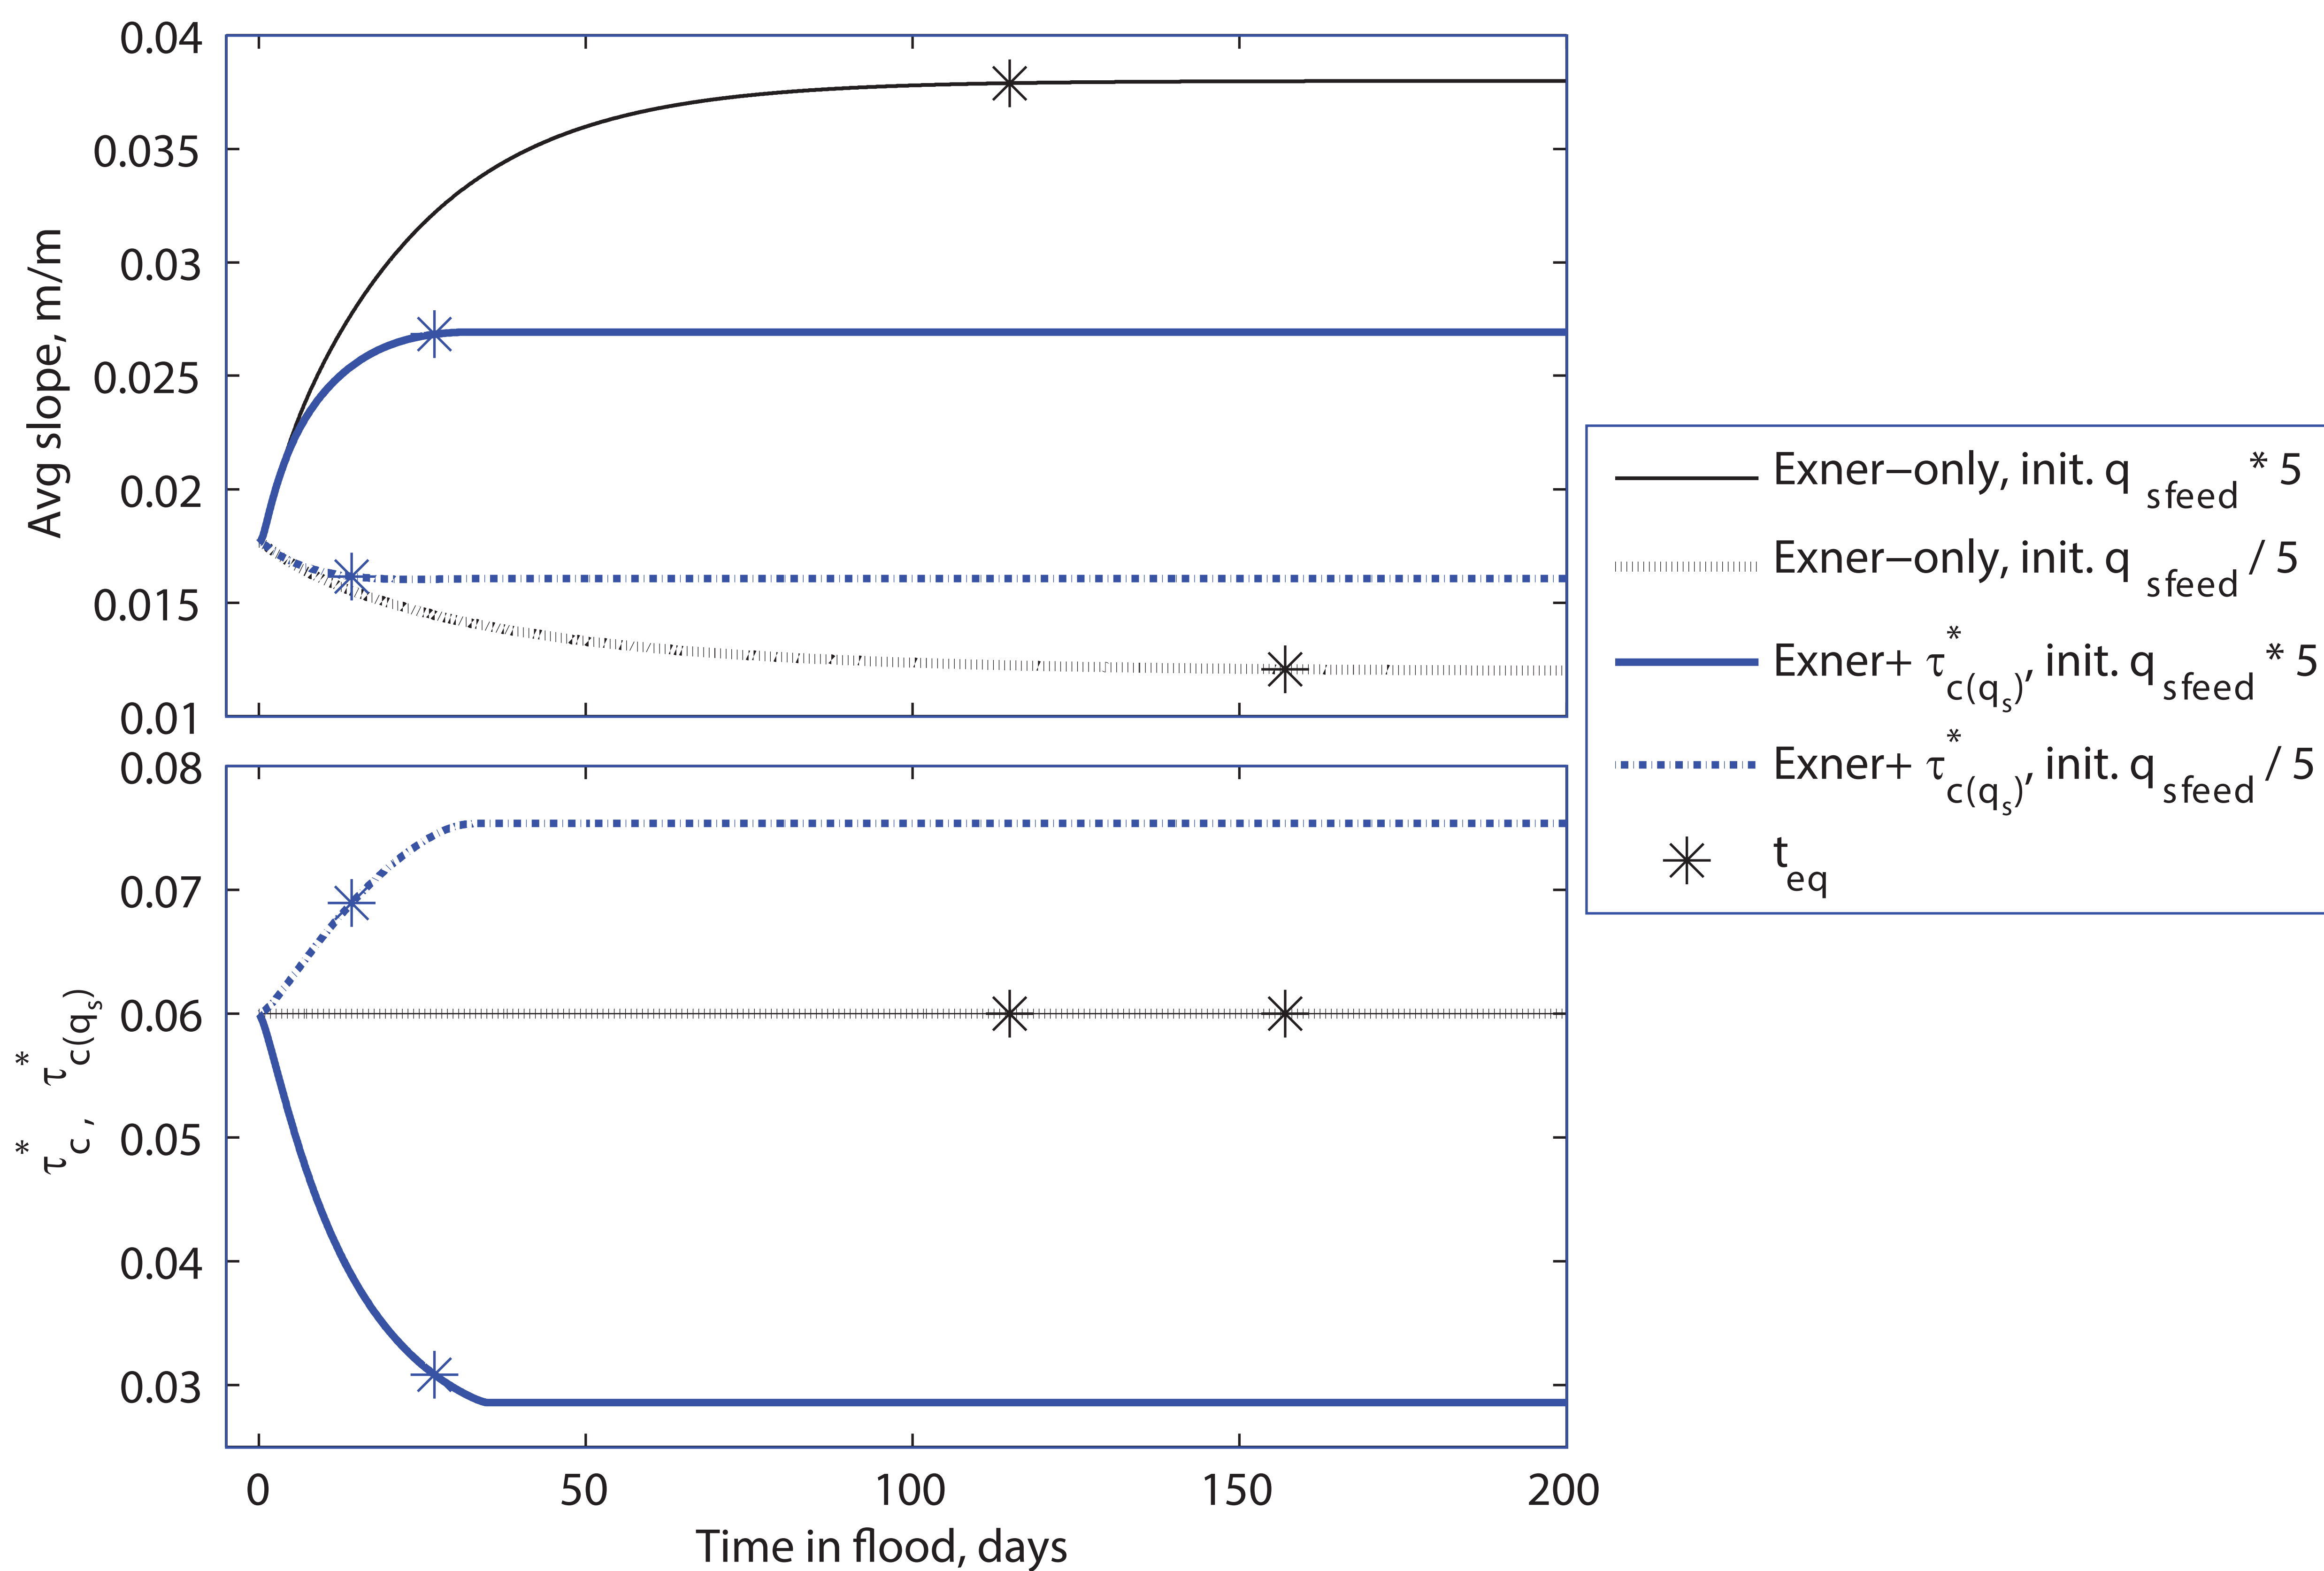

Figure 7. Slope and critical shear stress evolution, for sediment supply increases (which correspond to Fig. 6 models) and decreases by factors of 5. As in figure 6,  $t=0$  corresponds to an equilibrium condition where the initial slope and initial threshold are consistent with the initial upstream sediment supply. Slope and  $\tau_{c(q_s)}^*$  were averaged over model nodes 3-10, leaving out the first and last two nodes because of minor model boundary effects.

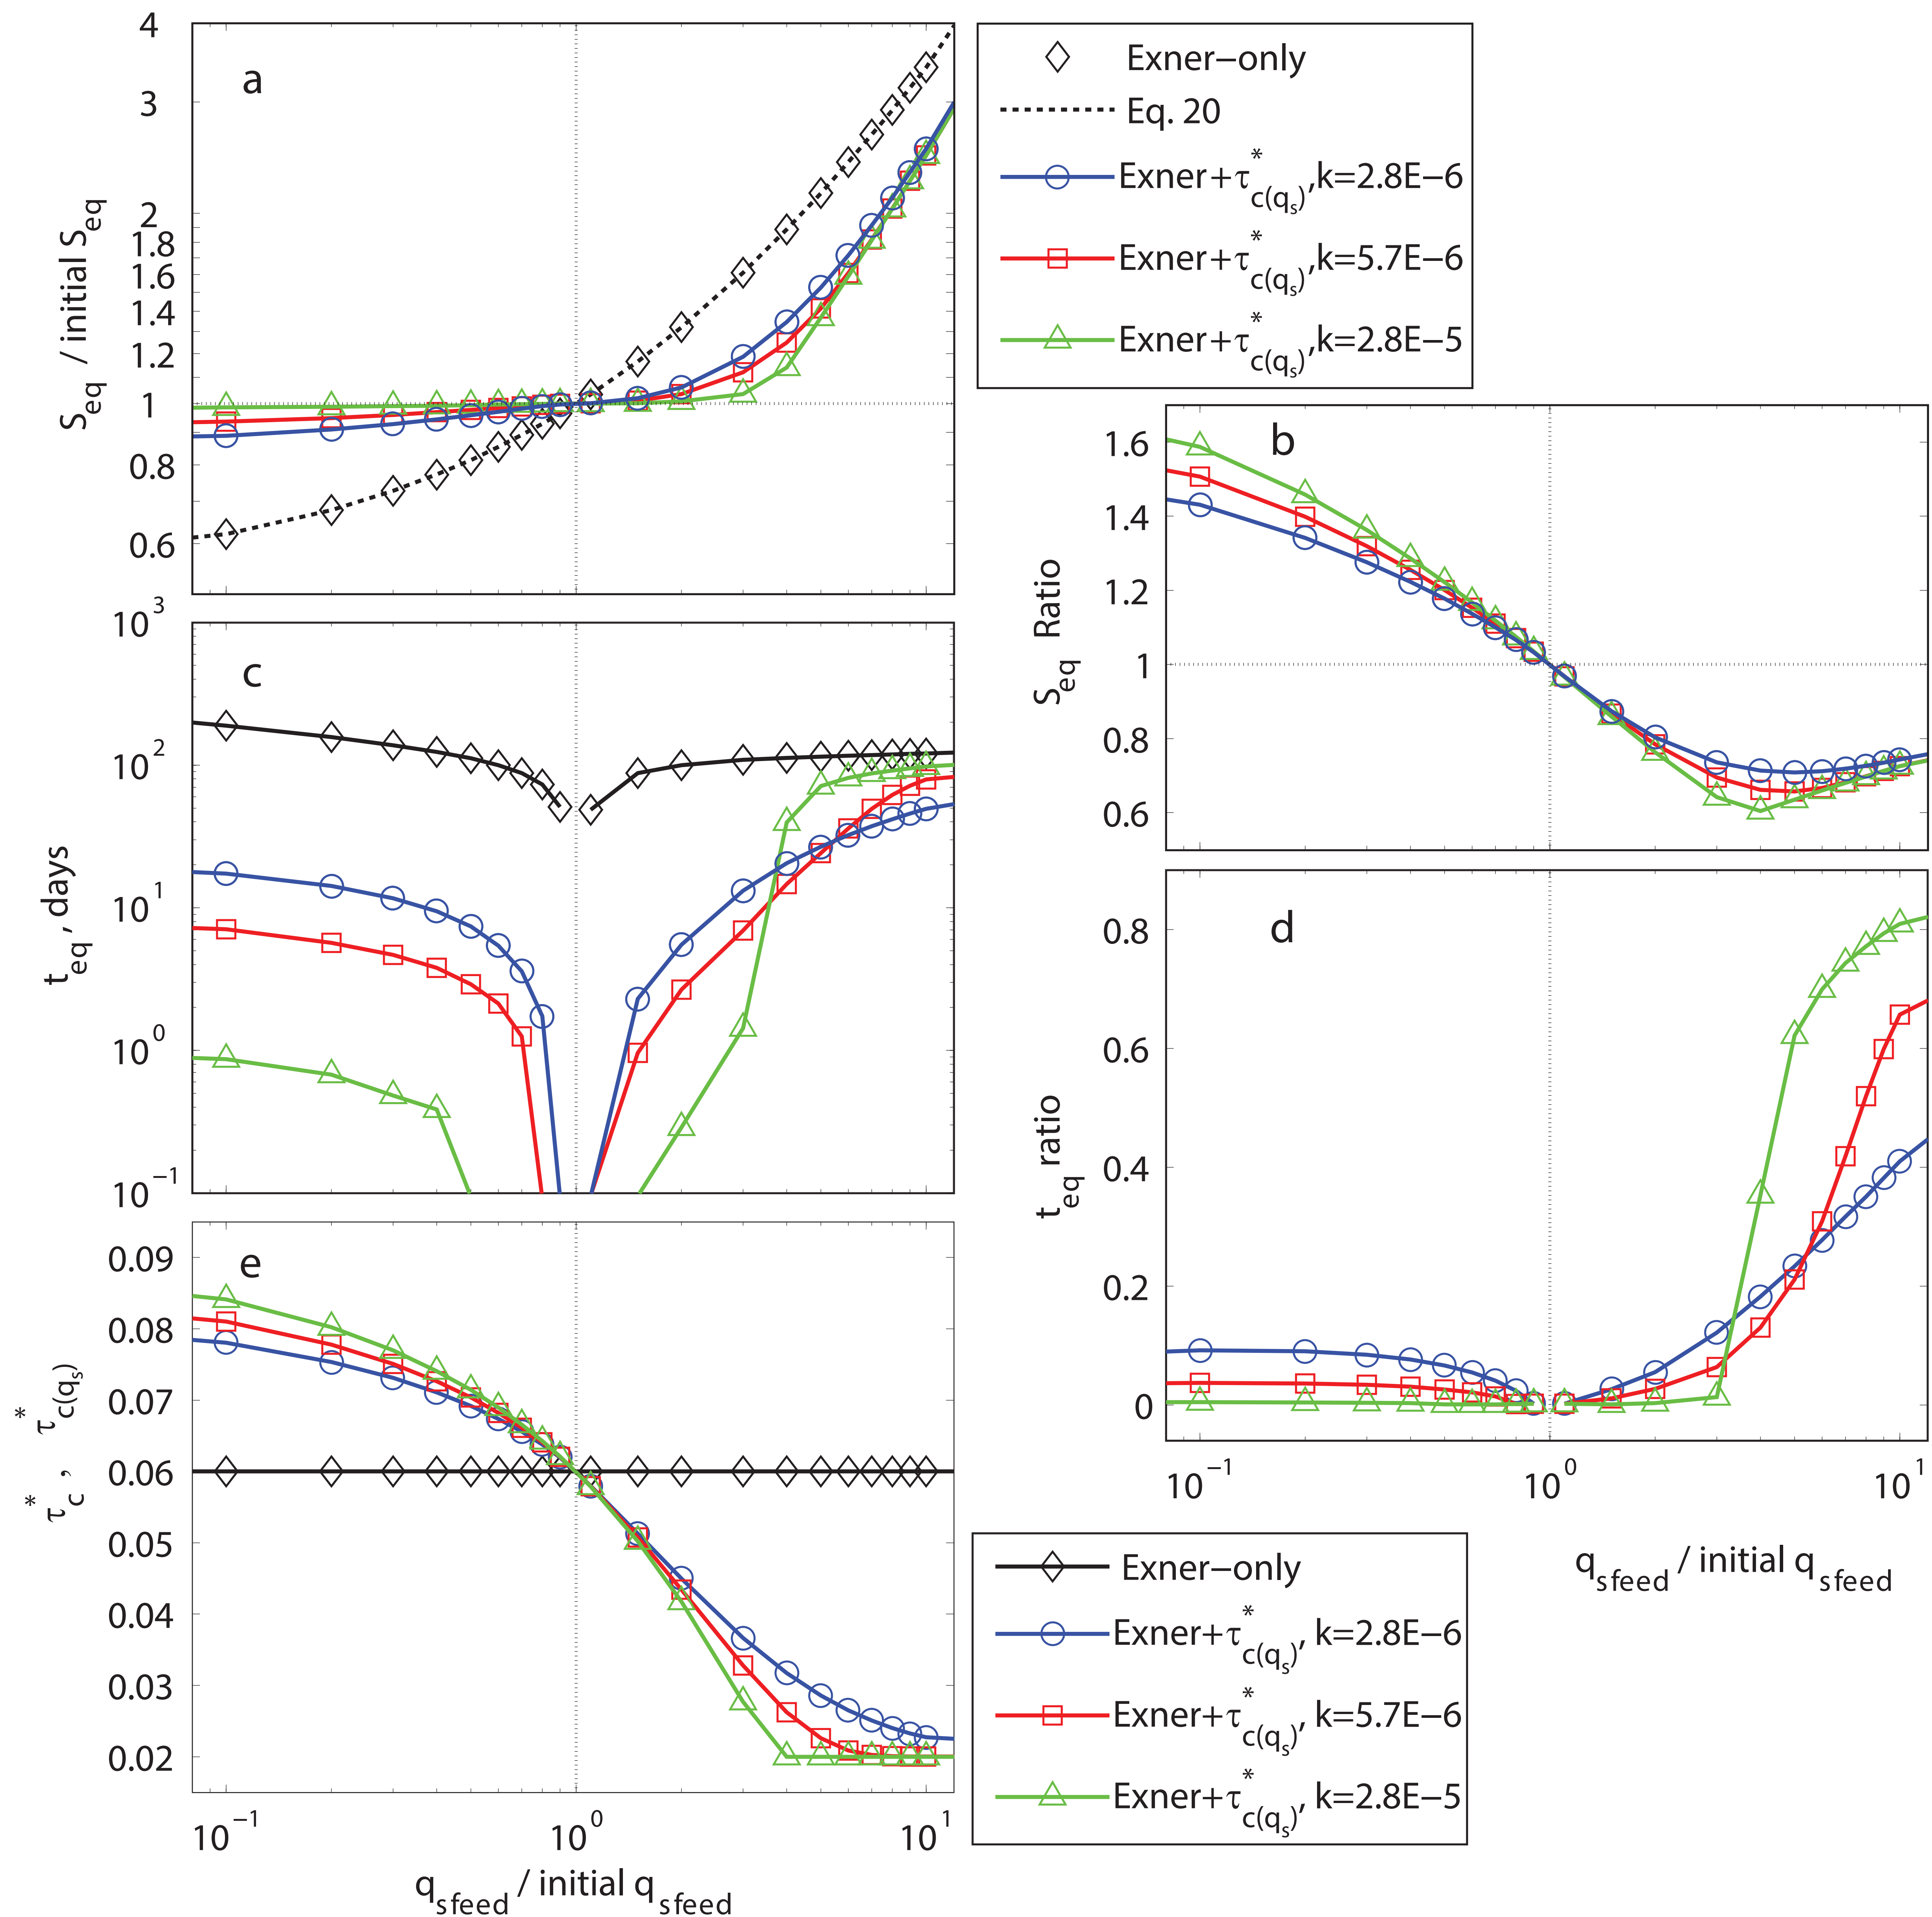

Figure 8. Morphodynamic model sensitivity to sediment supply perturbations and  $k$ . All models started at the same equilibrium condition as shown in Fig. 6 and 7. a. Slope adjustment, normalized by the initial equilibrium slope. The correspondence of Eq. 20 and the morphodynamic model calculations demonstrate that the models did asymptotically attain equilibrium slopes. b.  $S_{eq}$  ratio is the ratio of equilibrium slopes of the Exner+ $\tau_{c(q_s)}^*$  model divided by  $S_{eq}$  for the Exner-only model, to show the relative affect that that  $\tau_{c(q_s)}^*$  evolution has on equilibrium slopes. c. Equilibrium timescales for model adjustment. d.  $t_{eq}$  ratio is the ratio of  $t_{eq}$  for the Exner+ $\tau_{c(q_s)}^*$  model divided by  $t_{eq}$  for the Exner-only model. Values are lower than 1, indicating that the  $\tau_{c(q_s)}^*$  evolution has a large influence on equilibrium timescales. e. Evolution of  $\tau_{c(q_s)}^*$ .



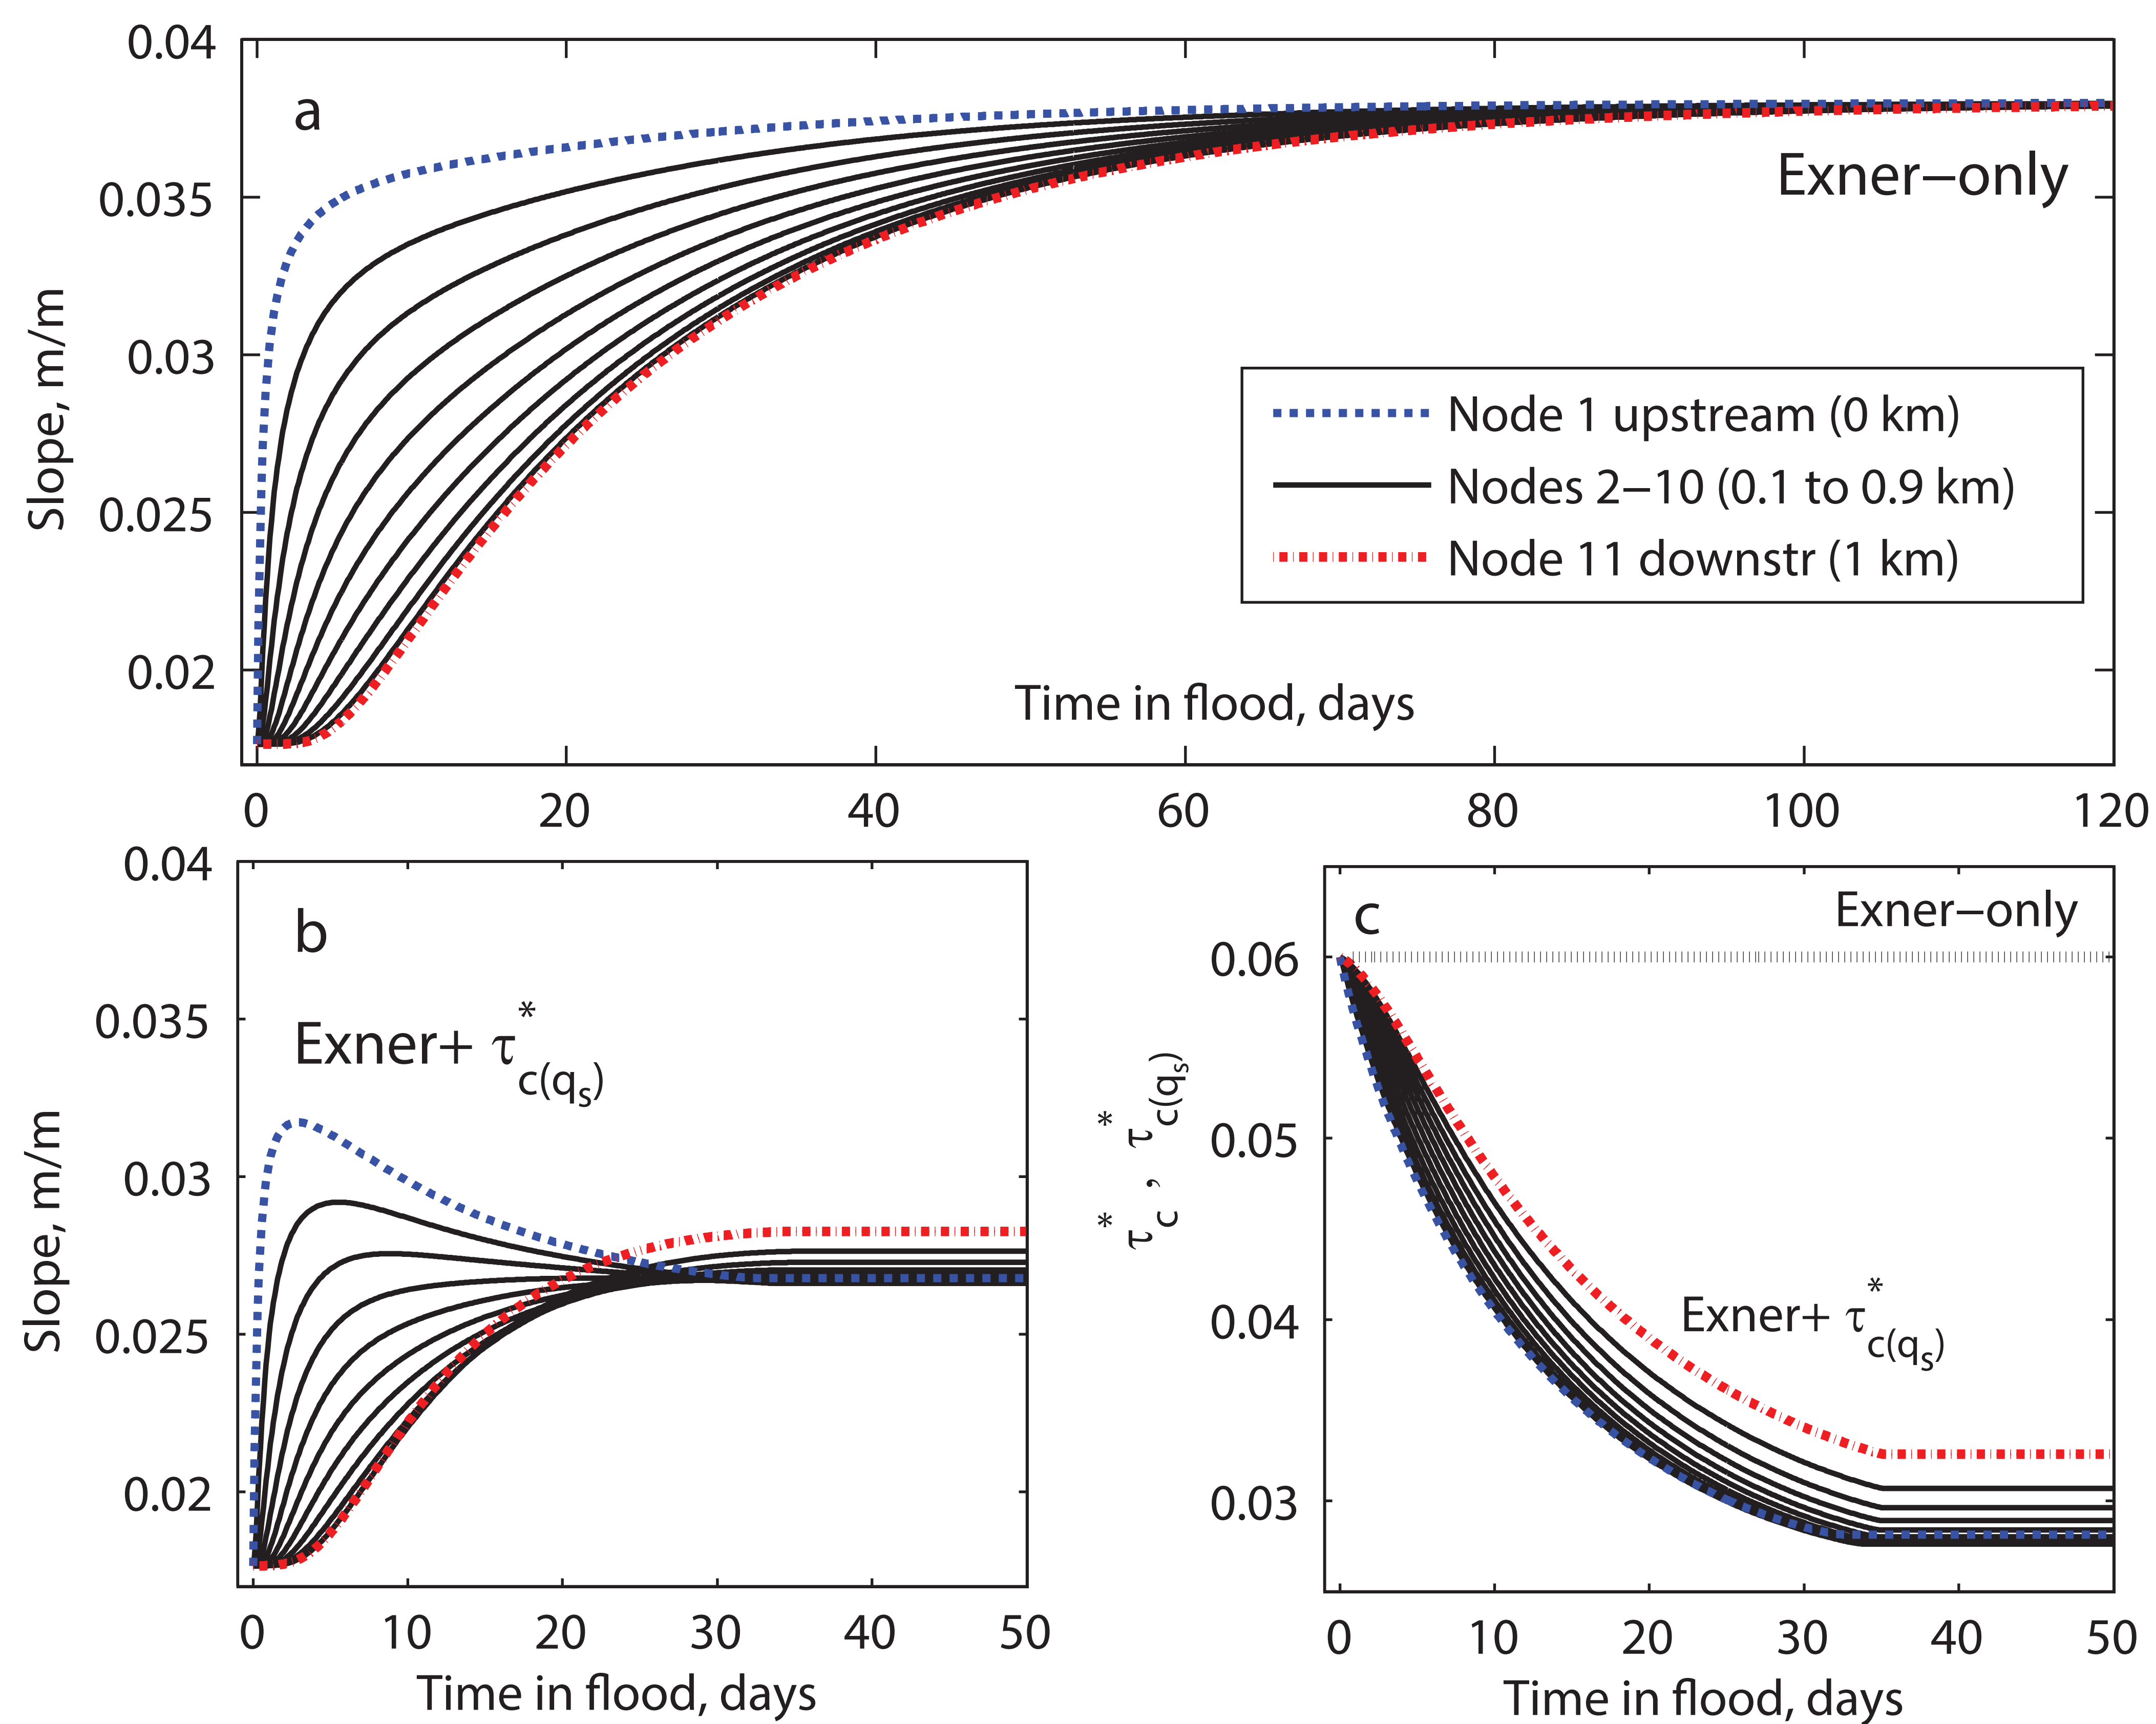

Figure 9. Spatial and temporal evolution of morphodynamic slopes, for the same models shown in Fig. 6. Slope is initially at equilibrium and responds to the 5x increase in upstream sediment supply at  $t=0$ . a. The Exner-only model initially has spatial slope variability, but evolves to a uniform new equilibrium slope. b, c. In the evolving  $\tau_{c(q_s)}^*$  model, slope and  $\tau_{c(q_s)}^*$  variability persist even at equilibrium.

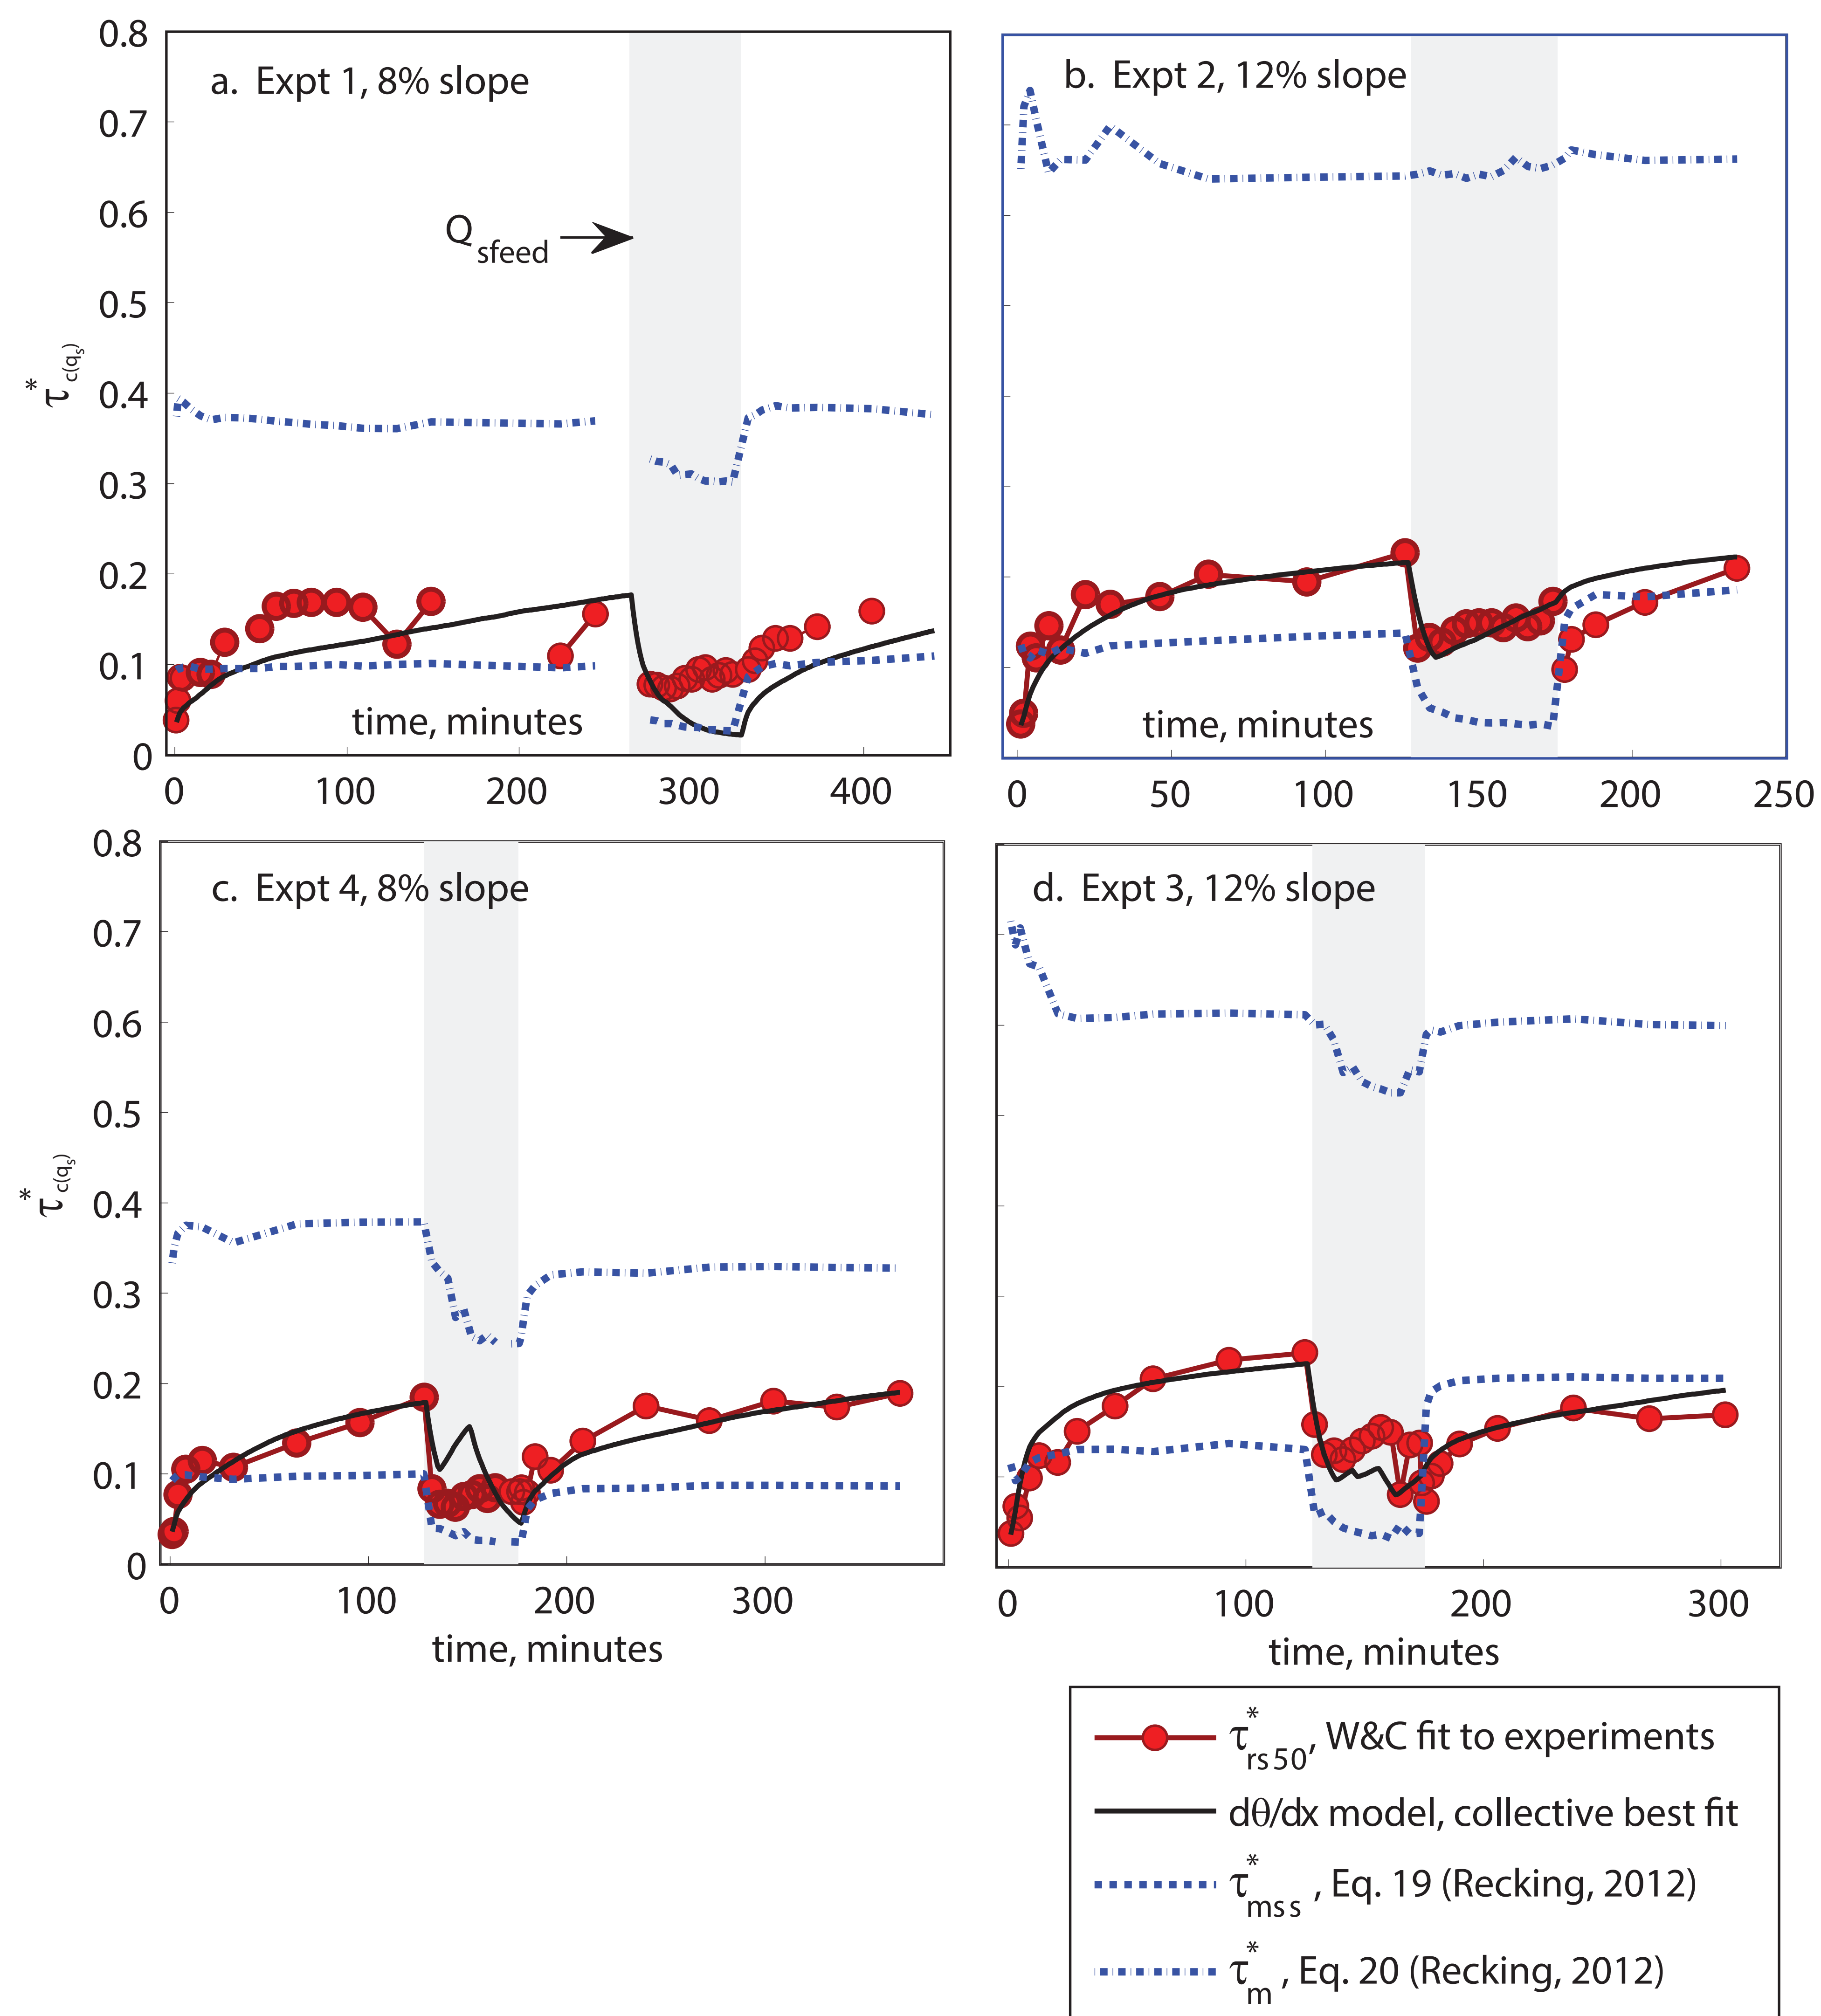

Figure 10. Comparison of experimental and best-fit model constraints on  $\tau_{rs50}^*$ , compared to proposed constraints for  $D_{84}$  reference stress bounds for low and high sediment supply from Recking (2012).
